# Supplementary material for: Systematic investigation of ABO 3 perovskite synthesis to generalise a La and Rh co-doping strategy for visible light photocatalysis
Source: Royal Society of Chemistry journal article supplement (doi:10.1039/d5na00338e), 2025-01-01
Supplement: d5na00338e2.xlsx [file d5na00338e2.xlsx]

## Sheet: Figure 2
	Intensity	Intensity	Intensity	Intensity	Intensity	Intensity	Intensity	Intensity	Intensity	Intensity	Intensity	Intensity
	a.u.	a.u.	a.u.	a.u.	a.u.	a.u.	a.u.	a.u.	a.u.	a.u.	a.u.	a.u.
2 theta	BaZrO3	La,Rh:BaZrO3	SrZrO3	La,Rh:SrZrO3	BaZr0.5Ti0.5O3	La,Rh:BaZr0.5Ti0.5O3	SrZr0.5Ti0.5O3	La,Rh:SrZr0.5Ti0.5O3	BaTiO3	La,Rh:BaTiO3	SrTiO3	La,Rh:SrTiO3
20	0.08414	0.0725	0.06182	0.05431	0.16798	0.20538	0.21035	0.23298	0.07077	0.14661	928	1290
20.028	0.08262	0.07303	0.06268	0.05326	0.17736	0.21077	0.21209	0.22906	0.06922	0.14622	918	1225
20.057	0.07658	0.07807	0.05973	0.05421	0.17763	0.20491	0.21272	0.23074	0.07139	0.15026	936	1215
20.085	0.08167	0.07303	0.05997	0.05396	0.17857	0.21124	0.21146	0.23391	0.06911	0.14844	868	1224
20.114	0.07897	0.07426	0.06287	0.05605	0.17535	0.21948	0.21035	0.23447	0.06694	0.13841	909	1272
20.142	0.08795	0.07364	0.06097	0.05286	0.17133	0.20443	0.20751	0.2341	0.07585	0.1431	925	1265
20.171	0.08636	0.07517	0.0603	0.0556	0.17334	0.2057	0.20215	0.22794	0.07284	0.14323	928	1250
20.199	0.08334	0.0783	0.05944	0.0551	0.16584	0.20285	0.20956	0.23223	0.06476	0.14648	940	1240
20.228	0.08461	0.07899	0.05797	0.05495	0.17816	0.19367	0.20578	0.23242	0.07263	0.14414	900	1169
20.256	0.08183	0.07089	0.05897	0.05605	0.16638	0.20839	0.2113	0.23074	0.0687	0.14831	948	1192
20.284	0.07913	0.06967	0.06321	0.055	0.16678	0.20649	0.20846	0.23802	0.06549	0.15951	923	1217
20.313	0.08056	0.07219	0.0593	0.05859	0.17147	0.20887	0.21067	0.23354	0.06694	0.15195	938	1260
20.341	0.08557	0.07456	0.06316	0.0565	0.17508	0.20713	0.20956	0.23596	0.06973	0.14401	916	1247
20.37	0.08159	0.07922	0.06359	0.05704	0.16879	0.19778	0.20672	0.22869	0.06942	0.14323	884	1280
20.398	0.0839	0.07678	0.05973	0.0556	0.1645	0.20554	0.21256	0.24268	0.06631	0.13984	876	1264
20.427	0.08207	0.07548	0.05787	0.05381	0.17629	0.21489	0.21367	0.23428	0.06797	0.14336	926	1299
20.455	0.08565	0.0738	0.05825	0.05605	0.17549	0.20222	0.20167	0.22776	0.06973	0.13542	887	1204
20.484	0.08366	0.07739	0.06025	0.05436	0.17133	0.20111	0.2214	0.23522	0.06797	0.13841	934	1226
20.512	0.08024	0.07456	0.05992	0.0548	0.17415	0.20428	0.21019	0.23634	0.07181	0.14622	892	1248
20.541	0.08581	0.07303	0.05701	0.0548	0.17455	0.20238	0.21193	0.2313	0.06963	0.14232	940	1220
20.569	0.08207	0.07991	0.05882	0.05426	0.1712	0.20285	0.21666	0.23578	0.06745	0.14792	950	1250
20.597	0.08199	0.078	0.06068	0.05759	0.16986	0.20412	0.20672	0.23279	0.06828	0.14388	841	1262
20.626	0.08445	0.07257	0.05987	0.05679	0.16999	0.1981	0.2143	0.23484	0.06735	0.14023	882	1320
20.654	0.08087	0.07189	0.05963	0.05754	0.17401	0.20364	0.2023	0.2369	0.063	0.14818	900	1296
20.683	0.08549	0.07219	0.05735	0.0546	0.16986	0.20602	0.20215	0.22347	0.06849	0.13815	927	1234
20.711	0.08334	0.07181	0.05968	0.0554	0.17428	0.20063	0.21019	0.23186	0.06673	0.14414	924	1200
20.74	0.07992	0.0728	0.05959	0.05505	0.17066	0.20665	0.20988	0.2382	0.06922	0.14609	884	1244
20.768	0.08159	0.07235	0.05763	0.05635	0.16812	0.2152	0.21714	0.22365	0.06942	0.14284	942	1167
20.797	0.08262	0.07471	0.05925	0.05769	0.17482	0.20618	0.21051	0.22943	0.0717	0.14531	903	1317
20.825	0.08087	0.07785	0.06192	0.05515	0.16812	0.19113	0.21035	0.2341	0.06652	0.14753	932	1202
20.853	0.08469	0.07364	0.06106	0.05635	0.16209	0.20681	0.20641	0.23391	0.07077	0.1418	962	1252
20.882	0.08135	0.07334	0.05873	0.05396	0.16356	0.20475	0.21414	0.2257	0.06984	0.14245	934	1263
20.91	0.08382	0.07479	0.06106	0.05704	0.16919	0.20697	0.2072	0.23746	0.07098	0.14974	916	1213
20.939	0.08612	0.07601	0.05944	0.05286	0.16463	0.20364	0.21051	0.23242	0.07212	0.14427	946	1245
20.967	0.08207	0.07288	0.05835	0.05441	0.16624	0.19652	0.20357	0.22906	0.07025	0.14492	912	1261
20.996	0.08501	0.07555	0.05744	0.0566	0.17026	0.20174	0.20546	0.24175	0.06963	0.14023	909	1203
21.024	0.08103	0.07899	0.06387	0.0555	0.1562	0.20491	0.20656	0.22552	0.06745	0.13932	904	1235
21.053	0.08231	0.0741	0.05892	0.0547	0.16919	0.19557	0.21824	0.22253	0.06517	0.14323	907	1182
21.081	0.08286	0.07387	0.05658	0.05406	0.16798	0.19208	0.20751	0.2175	0.06859	0.14063	916	1205
21.109	0.08469	0.0767	0.05763	0.05301	0.16517	0.20253	0.21272	0.23783	0.07004	0.14154	948	1238
21.138	0.08406	0.06929	0.0614	0.05809	0.17066	0.20348	0.20941	0.24417	0.06922	0.14766	913	1266
21.166	0.08199	0.07257	0.05963	0.05809	0.17749	0.20048	0.2012	0.24305	0.07004	0.15299	888	1225
21.195	0.0808	0.07479	0.05882	0.05336	0.16289	0.19319	0.20372	0.23223	0.0658	0.14063	911	1233
21.223	0.0792	0.07433	0.06163	0.05898	0.16383	0.19652	0.21303	0.21955	0.06507	0.13841	913	1191
21.252	0.08302	0.07823	0.05658	0.05391	0.17214	0.20348	0.20357	0.22197	0.06611	0.14466	885	1184
21.28	0.08334	0.07479	0.05944	0.05789	0.15834	0.20301	0.20151	0.22981	0.0689	0.14961	933	1258
21.309	0.07976	0.07617	0.05849	0.06093	0.16705	0.20396	0.2042	0.2341	0.063	0.14635	918	1242
21.337	0.08127	0.07502	0.05763	0.05879	0.16597	0.20079	0.21209	0.21675	0.07004	0.1431	939	1221
21.365	0.087	0.07815	0.05601	0.05301	0.16718	0.18812	0.20609	0.22608	0.06953	0.13841	894	1225
21.394	0.08223	0.07647	0.05811	0.0557	0.15901	0.19984	0.19867	0.22999	0.06435	0.13594	891	1257
21.422	0.08326	0.07639	0.05992	0.05774	0.16705	0.20697	0.20562	0.23895	0.07129	0.14049	948	1184
21.451	0.08087	0.07334	0.06397	0.05948	0.17508	0.20808	0.21019	0.22981	0.0631	0.14583	895	1223
21.479	0.0835	0.07441	0.06216	0.05455	0.16745	0.21077	0.21004	0.21992	0.06331	0.13815	910	1161
21.508	0.08135	0.0738	0.05706	0.05699	0.16155	0.19826	0.21019	0.23149	0.06725	0.14635	906	1170
21.536	0.08064	0.07548	0.05982	0.05759	0.15914	0.20396	0.20688	0.2341	0.06973	0.13021	939	1223
21.565	0.08095	0.07364	0.05792	0.05684	0.16075	0.21156	0.21004	0.22925	0.07067	0.14219	884	1194
21.593	0.07825	0.07448	0.0604	0.05485	0.16021	0.20111	0.19867	0.23484	0.07015	0.14076	882	1226
21.622	0.08072	0.07563	0.05911	0.05356	0.17227	0.20491	0.20514	0.22943	0.06797	0.14961	949	1250
21.65	0.0835	0.07349	0.06063	0.0546	0.1637	0.20681	0.21161	0.23298	0.07263	0.13646	890	1231
21.678	0.0796	0.07212	0.0572	0.05585	0.15847	0.19446	0.20656	0.22794	0.06714	0.13893	962	1197
21.707	0.07626	0.07517	0.05759	0.05431	0.16397	0.20063	0.2083	0.21768	0.06704	0.14453	890	1193
21.735	0.08231	0.06883	0.05682	0.05366	0.15539	0.19873	0.20593	0.24156	0.07222	0.1388	901	1221
21.764	0.08032	0.07349	0.05839	0.05426	0.15981	0.19113	0.20309	0.22235	0.06953	0.13346	927	1157
21.792	0.08294	0.07181	0.05911	0.05396	0.16731	0.20127	0.20814	0.22421	0.07388	0.13659	917	1112
21.821	0.07952	0.07204	0.0573	0.05694	0.15687	0.20048	0.19899	0.22104	0.07098	0.13867	938	1190
21.849	0.08135	0.07196	0.05768	0.0561	0.16169	0.19873	0.20309	0.23223	0.06984	0.14531	948	1257
21.878	0.0831	0.0741	0.0583	0.05645	0.15861	0.1924	0.19994	0.22869	0.07232	0.1431	887	1170
21.906	0.08294	0.07532	0.06035	0.05505	0.15486	0.20174	0.19978	0.21806	0.06808	0.14583	877	1211
21.934	0.08215	0.06982	0.05916	0.05595	0.16129	0.19462	0.20578	0.22496	0.07139	0.13776	985	1219
21.963	0.08382	0.07296	0.05616	0.05152	0.16303	0.19588	0.19915	0.2257	0.06611	0.13802	918	1213
21.991	0.08	0.07769	0.05558	0.05699	0.1641	0.20238	0.19804	0.22608	0.07201	0.13073	923	1265
22.02	0.08588	0.0751	0.05792	0.05545	0.16316	0.19192	0.20956	0.23484	0.06797	0.1474	936	1211
22.048	0.08111	0.07403	0.05963	0.05605	0.17254	0.20222	0.20278	0.23279	0.06507	0.13203	913	1196
22.077	0.07849	0.0741	0.05925	0.05431	0.16249	0.19921	0.20956	0.23951	0.07139	0.14427	945	1169
22.105	0.08453	0.07701	0.05792	0.05719	0.16597	0.20079	0.2042	0.23074	0.06528	0.13841	903	1160
22.134	0.07833	0.07632	0.05768	0.05749	0.16075	0.20523	0.21524	0.2313	0.06704	0.14349	855	1194
22.162	0.08207	0.07288	0.05611	0.05764	0.16222	0.19018	0.21288	0.2341	0.07346	0.13932	893	1177
22.19	0.0792	0.07227	0.06011	0.05719	0.17321	0.20174	0.19725	0.22403	0.0744	0.14063	906	1190
22.219	0.08286	0.07525	0.05992	0.05475	0.16075	0.19161	0.20909	0.22999	0.06611	0.14193	983	1257
22.247	0.07809	0.07235	0.05568	0.05864	0.16236	0.18749	0.20925	0.22347	0.06704	0.14206	918	1234
22.276	0.0808	0.07617	0.05906	0.05834	0.16196	0.19319	0.21114	0.24025	0.06994	0.13711	877	1242
22.304	0.07698	0.07578	0.05759	0.05426	0.16263	0.20063	0.20357	0.22384	0.07844	0.13958	985	1213
22.333	0.07928	0.07632	0.05539	0.0546	0.14936	0.19414	0.20388	0.21656	0.06642	0.14193	983	1188
22.361	0.08398	0.07723	0.0602	0.05665	0.16772	0.19367	0.2023	0.22328	0.07004	0.1375	888	1201
22.39	0.08429	0.07135	0.05525	0.05694	0.16397	0.19177	0.20893	0.22757	0.07222	0.13451	929	1183
22.418	0.08072	0.06891	0.05682	0.0546	0.15539	0.19161	0.20562	0.22701	0.06797	0.13112	917	1213
22.447	0.07968	0.07296	0.05778	0.0551	0.15887	0.19145	0.21272	0.22328	0.07087	0.14115	927	1217
22.475	0.08445	0.07357	0.05887	0.05674	0.15941	0.18765	0.21319	0.22794	0.07212	0.14336	906	1186
22.503	0.07801	0.07212	0.0594	0.05565	0.16209	0.19557	0.19899	0.22365	0.0716	0.13581	927	1187
22.532	0.08	0.06921	0.05859	0.0547	0.16062	0.19921	0.20215	0.21712	0.06973	0.13464	956	1241
22.56	0.07706	0.07196	0.05801	0.05704	0.1645	0.20333	0.20372	0.21824	0.07036	0.13568	966	1207
22.589	0.07642	0.07502	0.05859	0.05575	0.15579	0.19398	0.19504	0.22141	0.06766	0.13411	969	1157
22.617	0.08302	0.07395	0.05706	0.05525	0.16397	0.19097	0.19568	0.21395	0.07295	0.12747	968	1208
22.646	0.08048	0.07066	0.05563	0.05376	0.16477	0.18987	0.20388	0.22365	0.07108	0.13177	914	1158
22.674	0.07602	0.07739	0.05887	0.0547	0.15727	0.19921	0.18179	0.23335	0.06973	0.14089	994	1205
22.703	0.08032	0.06822	0.05992	0.05465	0.16691	0.19351	0.19867	0.22309	0.06704	0.13516	900	1244
22.731	0.08414	0.06822	0.05778	0.0566	0.1637	0.18242	0.19552	0.21712	0.06621	0.14206	922	1161
22.759	0.0808	0.0712	0.05725	0.05117	0.15995	0.19367	0.20104	0.23298	0.07232	0.14596	988	1179
22.788	0.07905	0.07288	0.05749	0.05376	0.16798	0.18892	0.20404	0.23447	0.07253	0.13828	904	1137
22.816	0.08032	0.0712	0.06063	0.05316	0.15995	0.18828	0.20814	0.22104	0.06839	0.14036	945	1154
22.845	0.07451	0.07135	0.05873	0.0566	0.15901	0.20048	0.2012	0.22552	0.06859	0.12956	937	1122
22.873	0.08016	0.07044	0.06235	0.05331	0.16316	0.19367	0.19962	0.22141	0.07036	0.1349	994	1175
22.902	0.08119	0.06883	0.05897	0.05222	0.14883	0.19208	0.19931	0.22104	0.06735	0.13646	986	1136
22.93	0.07785	0.07479	0.05959	0.05545	0.15419	0.18781	0.20909	0.22029	0.07118	0.13542	958	1152
22.959	0.07936	0.07059	0.05835	0.0546	0.15392	0.19794	0.19031	0.21526	0.06631	0.13906	933	1154
22.987	0.08541	0.07227	0.05782	0.05515	0.15271	0.19968	0.19899	0.22869	0.06818	0.1349	969	1114
23.015	0.07674	0.07265	0.05906	0.05197	0.14896	0.19604	0.21019	0.21377	0.06859	0.14336	943	1195
23.044	0.07698	0.07494	0.05611	0.05231	0.15807	0.18987	0.19836	0.21955	0.07108	0.13971	1023	1096
23.072	0.08127	0.07273	0.0552	0.05495	0.15928	0.1867	0.19473	0.22888	0.06704	0.14271	924	1162
23.101	0.07769	0.06998	0.05558	0.05665	0.14869	0.18242	0.19899	0.21544	0.0689	0.14141	903	1150
23.129	0.07793	0.07487	0.05849	0.05341	0.15754	0.18321	0.19189	0.22029	0.06901	0.13646	937	1235
23.158	0.08087	0.07128	0.06006	0.05226	0.15847	0.19129	0.19299	0.22253	0.06963	0.13607	960	1161
23.186	0.0804	0.06906	0.05892	0.05535	0.15807	0.18559	0.21225	0.2216	0.0716	0.1487	895	1158
23.215	0.07547	0.07403	0.0583	0.0556	0.15499	0.18559	0.19883	0.21899	0.0774	0.13438	906	1171
23.243	0.0761	0.07051	0.05782	0.05739	0.1578	0.18401	0.20325	0.22029	0.06973	0.1375	917	1190
23.272	0.08048	0.06921	0.05611	0.05087	0.157	0.18622	0.19583	0.20873	0.07087	0.14219	896	1180
23.3	0.07682	0.0715	0.05744	0.05485	0.16155	0.18622	0.19883	0.2119	0.07139	0.13672	969	1175
23.328	0.0773	0.06906	0.05982	0.0548	0.1566	0.17941	0.19931	0.21302	0.07087	0.1293	941	1173
23.357	0.07602	0.07395	0.05768	0.05515	0.15338	0.17894	0.1941	0.22291	0.06787	0.14466	946	1175
23.385	0.08048	0.06471	0.05578	0.05565	0.1562	0.19018	0.20294	0.21265	0.07108	0.14271	948	1146
23.414	0.07849	0.07433	0.05763	0.05301	0.15231	0.18575	0.20025	0.21824	0.07046	0.12669	955	1213
23.442	0.0808	0.07135	0.05439	0.0558	0.15995	0.1943	0.19315	0.22943	0.06849	0.13164	929	1177
23.471	0.0796	0.06982	0.05682	0.05102	0.15526	0.18939	0.19962	0.22552	0.0773	0.13802	917	1157
23.499	0.07928	0.06975	0.05668	0.05545	0.15807	0.19113	0.19441	0.22738	0.06725	0.14844	965	1150
23.528	0.07435	0.07044	0.0592	0.0545	0.15941	0.18416	0.19473	0.21787	0.06942	0.13945	909	1146
23.556	0.08	0.0728	0.05882	0.05381	0.15044	0.18702	0.21635	0.22123	0.06953	0.1263	936	1185
23.584	0.08127	0.07066	0.05678	0.05565	0.15687	0.19192	0.20025	0.22533	0.06745	0.13177	939	1128
23.613	0.07722	0.07105	0.06216	0.05739	0.15338	0.17688	0.19457	0.20761	0.06973	0.13398	932	1146
23.641	0.07459	0.0715	0.05882	0.0554	0.15687	0.18005	0.20009	0.22141	0.07108	0.13203	903	1200
23.67	0.07809	0.07189	0.05654	0.0549	0.1507	0.17672	0.2023	0.20612	0.07605	0.12995	974	1175
23.698	0.07769	0.07219	0.0553	0.05625	0.14977	0.19367	0.20294	0.20966	0.07212	0.1319	977	1127
23.727	0.07809	0.0725	0.05587	0.05465	0.14481	0.1848	0.20593	0.22533	0.07543	0.12747	1047	1179
23.755	0.07722	0.07219	0.05582	0.0551	0.15687	0.18416	0.2012	0.22085	0.06859	0.13294	952	1153
23.784	0.07507	0.06952	0.05778	0.0556	0.14883	0.18416	0.20073	0.21526	0.07108	0.13763	910	1176
23.812	0.08254	0.07364	0.05568	0.0556	0.15887	0.19113	0.20073	0.21246	0.06973	0.13581	895	1123
23.84	0.07793	0.07372	0.05706	0.056	0.14468	0.18068	0.19173	0.22085	0.07004	0.13542	938	1124
23.869	0.07889	0.07196	0.05554	0.055	0.16048	0.19351	0.21398	0.21694	0.06839	0.14115	943	1176
23.897	0.07817	0.07051	0.05568	0.05371	0.14923	0.18353	0.1911	0.21563	0.06466	0.12891	935	1160
23.926	0.07984	0.07021	0.05449	0.05356	0.15177	0.19034	0.19536	0.21526	0.06517	0.13021	913	1144
23.954	0.07658	0.07387	0.05773	0.0548	0.15539	0.19382	0.19441	0.22011	0.06963	0.13294	942	1193
23.983	0.08087	0.0728	0.0562	0.05669	0.15191	0.17973	0.18936	0.2175	0.06756	0.14036	896	1136
24.011	0.08795	0.07685	0.05692	0.05321	0.15405	0.19683	0.19852	0.23093	0.06849	0.13385	975	1193
24.04	0.08342	0.07892	0.05801	0.05311	0.15124	0.18511	0.19568	0.21544	0.07491	0.13086	914	1133
24.068	0.08859	0.08442	0.05578	0.05485	0.15593	0.18496	0.20388	0.20481	0.07004	0.13945	936	1087
24.096	0.08922	0.08189	0.05454	0.0554	0.15271	0.18797	0.19931	0.20966	0.06704	0.13268	875	1157
24.125	0.08461	0.07968	0.05625	0.05416	0.15459	0.19588	0.20499	0.22664	0.0688	0.13164	949	1144
24.153	0.08151	0.07532	0.05878	0.0552	0.15338	0.19256	0.19836	0.21656	0.06642	0.13516	897	1126
24.182	0.0792	0.07532	0.05325	0.05376	0.15486	0.18749	0.18447	0.21712	0.0715	0.1375	951	1210
24.21	0.08016	0.0767	0.05658	0.05679	0.16437	0.19319	0.19552	0.21283	0.06507	0.13021	924	1165
24.239	0.07833	0.07296	0.0593	0.05441	0.14896	0.19873	0.1911	0.21918	0.07212	0.13346	953	1136
24.267	0.08072	0.07097	0.06049	0.05416	0.15285	0.18892	0.19	0.22552	0.07191	0.12813	956	1174
24.296	0.07237	0.07135	0.06073	0.05406	0.1566	0.18622	0.19568	0.21115	0.07181	0.12917	891	1139
24.324	0.07738	0.07219	0.05744	0.05535	0.15338	0.18496	0.19173	0.22347	0.07336	0.12096	985	1148
24.353	0.08008	0.06837	0.05754	0.05087	0.15419	0.1924	0.19094	0.21433	0.06248	0.14023	926	1125
24.381	0.07944	0.06998	0.05963	0.05426	0.14869	0.18907	0.19504	0.21227	0.07025	0.13776	881	1106
24.409	0.07825	0.0699	0.05782	0.05754	0.15928	0.18638	0.19852	0.22029	0.0689	0.13672	913	1117
24.438	0.07602	0.06929	0.06144	0.0551	0.157	0.19208	0.1922	0.21992	0.06984	0.14063	975	1199
24.466	0.07746	0.06822	0.06011	0.0551	0.15767	0.18955	0.19867	0.21004	0.07326	0.13555	967	1111
24.495	0.07666	0.06967	0.06082	0.0561	0.16048	0.19272	0.20278	0.21153	0.06973	0.13359	944	1086
24.523	0.07443	0.06562	0.06111	0.06098	0.15673	0.19588	0.20846	0.21544	0.07274	0.13138	936	1098
24.552	0.07785	0.07166	0.06721	0.06227	0.16102	0.19572	0.20467	0.21806	0.07181	0.125	903	1209
24.58	0.07801	0.06875	0.07297	0.06336	0.16772	0.20507	0.20751	0.22123	0.06994	0.13112	903	1175
24.609	0.08334	0.07059	0.07002	0.07083	0.16772	0.21172	0.21035	0.22813	0.07398	0.13346	927	1157
24.637	0.07817	0.06753	0.07045	0.06715	0.1795	0.21188	0.21114	0.21992	0.07481	0.14128	873	1142
24.665	0.07634	0.07235	0.06597	0.06645	0.18835	0.22866	0.20578	0.22253	0.06818	0.12995	943	1101
24.694	0.07491	0.07303	0.06344	0.06172	0.20013	0.23658	0.20546	0.21526	0.07657	0.13229	936	1162
24.722	0.0761	0.0699	0.06397	0.06127	0.2079	0.2331	0.20262	0.22645	0.07077	0.14193	947	1092
24.751	0.07539	0.06837	0.06049	0.05913	0.20804	0.2342	0.19631	0.21899	0.07885	0.12943	925	1061
24.779	0.07221	0.06967	0.05759	0.05963	0.20549	0.21758	0.1952	0.21955	0.07419	0.13529	907	1099
24.808	0.08008	0.06914	0.05997	0.0558	0.19612	0.21552	0.19852	0.22104	0.07295	0.13385	957	1158
24.836	0.07499	0.06883	0.05887	0.05804	0.18513	0.21441	0.19157	0.21899	0.06538	0.1431	915	1138
24.865	0.07101	0.06753	0.05601	0.055	0.17334	0.19715	0.19915	0.21115	0.0746	0.13945	949	1178
24.893	0.07801	0.06998	0.05568	0.06023	0.16785	0.18987	0.19852	0.21358	0.07688	0.13307	886	1096
24.921	0.07523	0.0715	0.05558	0.0546	0.16182	0.19351	0.18589	0.21899	0.07232	0.14232	871	1093
24.95	0.07531	0.07204	0.05882	0.0552	0.15887	0.18496	0.19536	0.21227	0.07978	0.15013	883	1146
24.978	0.07849	0.07166	0.05568	0.05485	0.15834	0.1848	0.19978	0.20742	0.08103	0.15898	939	1094
25.007	0.0808	0.07235	0.05759	0.05411	0.15834	0.18211	0.18605	0.20948	0.09854	0.18854	931	1166
25.035	0.07714	0.07021	0.05387	0.05421	0.1574	0.17973	0.19173	0.21153	0.11532	0.19284	948	1098
25.064	0.0761	0.07601	0.05449	0.05406	0.15392	0.18781	0.19315	0.21078	0.13346	0.19544	979	1073
25.092	0.07372	0.06967	0.0552	0.0546	0.14682	0.18686	0.18731	0.22029	0.1348	0.18229	922	1085
25.121	0.07626	0.06746	0.05439	0.05291	0.14521	0.18448	0.18968	0.21041	0.12144	0.17539	1015	1109
25.149	0.07483	0.06539	0.05325	0.05157	0.14293	0.18654	0.1799	0.19698	0.10942	0.17174	930	1181
25.178	0.07658	0.06272	0.05492	0.05226	0.14963	0.18242	0.18005	0.20183	0.10113	0.16706	892	1179
25.206	0.07507	0.06799	0.05306	0.04918	0.13583	0.18242	0.1941	0.21395	0.09771	0.17565	924	1237
25.234	0.07746	0.06814	0.05763	0.05386	0.15472	0.17165	0.19362	0.21246	0.0973	0.18685	923	1106
25.263	0.07348	0.06769	0.05325	0.05535	0.15754	0.18211	0.18684	0.21582	0.11014	0.2237	920	1119
25.291	0.07348	0.0715	0.05358	0.05824	0.14481	0.18021	0.18984	0.1994	0.13594	0.26549	920	1127
25.32	0.07332	0.07013	0.05558	0.05475	0.15017	0.17023	0.18132	0.20686	0.17884	0.25482	986	1093
25.348	0.07761	0.06875	0.05635	0.05102	0.15137	0.18543	0.1952	0.21302	0.21076	0.22201	934	1101
25.377	0.06998	0.06723	0.05673	0.05182	0.14253	0.18543	0.19189	0.22328	0.1948	0.19115	977	1085
25.405	0.07714	0.0725	0.05635	0.05475	0.1432	0.18575	0.18779	0.22384	0.15118	0.16615	947	1131
25.434	0.07268	0.07311	0.05639	0.05306	0.14615	0.18496	0.19568	0.20575	0.11626	0.14271	999	1131
25.462	0.0726	0.06402	0.05468	0.05381	0.13838	0.18116	0.18116	0.20519	0.0888	0.13919	943	1132
25.49	0.07531	0.07426	0.05763	0.05426	0.14468	0.18036	0.19426	0.21004	0.07284	0.13177	949	1120
25.519	0.07356	0.06646	0.0553	0.05361	0.14615	0.18638	0.1952	0.21974	0.07823	0.13542	952	1120
25.547	0.0726	0.06486	0.05454	0.05595	0.14816	0.18432	0.19962	0.21899	0.07771	0.13424	975	1116
25.576	0.07054	0.06944	0.0532	0.0562	0.15419	0.18195	0.20246	0.216	0.07595	0.13516	970	1141
25.604	0.07396	0.0728	0.05392	0.05316	0.15392	0.1848	0.19789	0.21936	0.0717	0.13255	876	1121
25.633	0.07483	0.07265	0.05663	0.05724	0.1432	0.1867	0.19583	0.21563	0.07326	0.12682	987	1109
25.661	0.07268	0.06853	0.05425	0.05819	0.14789	0.17751	0.20325	0.22477	0.07512	0.14076	945	1114
25.69	0.07284	0.06623	0.05592	0.05485	0.14802	0.18401	0.20625	0.2285	0.06828	0.12969	919	1167
25.718	0.07324	0.06738	0.05468	0.05256	0.14588	0.17672	0.20025	0.21992	0.07367	0.13164	925	1134
25.746	0.07372	0.07433	0.05358	0.0553	0.15177	0.18116	0.20025	0.23634	0.07067	0.13424	964	1128
25.775	0.07467	0.07173	0.05754	0.05331	0.14427	0.17878	0.19426	0.21358	0.07626	0.13919	1003	1100
25.803	0.073	0.06883	0.05506	0.05625	0.14829	0.19018	0.20041	0.20481	0.07823	0.13307	992	1196
25.832	0.07141	0.07028	0.05458	0.05291	0.13918	0.16453	0.1971	0.21955	0.0745	0.1306	1061	1268
25.86	0.07491	0.06822	0.05687	0.05396	0.14789	0.18131	0.19142	0.20686	0.07315	0.13646	1126	1291
25.889	0.07372	0.07082	0.05468	0.05281	0.15378	0.17704	0.20104	0.20798	0.07554	0.12747	1239	1348
25.917	0.07356	0.06654	0.05525	0.05271	0.14347	0.16342	0.20104	0.22738	0.06859	0.13086	1384	1444
25.946	0.07586	0.06998	0.05487	0.0546	0.13905	0.17894	0.18858	0.21712	0.07191	0.13203	1317	1427
25.974	0.07722	0.06891	0.05501	0.05431	0.13168	0.18496	0.19852	0.21694	0.0744	0.13164	1285	1284
26.003	0.07626	0.06982	0.05458	0.05689	0.14534	0.1848	0.19662	0.20239	0.07305	0.12799	1269	1282
26.031	0.07539	0.06593	0.05435	0.05311	0.14119	0.17134	0.19978	0.2091	0.07326	0.12266	1121	1157
26.059	0.06982	0.07044	0.05639	0.05485	0.14936	0.17245	0.1941	0.21582	0.07232	0.12552	1036	1170
26.088	0.07022	0.06868	0.05335	0.05585	0.14682	0.18021	0.18384	0.20481	0.07346	0.1349	1093	1139
26.116	0.07245	0.0686	0.05611	0.05465	0.14601	0.17514	0.19252	0.21041	0.07388	0.12357	959	1119
26.145	0.07642	0.06891	0.05392	0.04998	0.14628	0.17751	0.19568	0.19959	0.07201	0.12982	975	1127
26.173	0.0726	0.06501	0.05111	0.05421	0.14668	0.1726	0.19647	0.20425	0.07295	0.12266	948	1138
26.202	0.07634	0.07173	0.05487	0.05271	0.14735	0.17957	0.19394	0.20836	0.07077	0.12305	1043	1147
26.23	0.07706	0.06814	0.05411	0.05202	0.1428	0.18258	0.19	0.2175	0.06642	0.12552	1021	1107
26.259	0.07427	0.0686	0.05759	0.05281	0.14025	0.17403	0.184	0.20985	0.06942	0.13411	986	1109
26.287	0.07571	0.06738	0.05744	0.05077	0.14092	0.17878	0.1952	0.21768	0.07108	0.13177	969	1178
26.315	0.0773	0.0683	0.05763	0.05197	0.14695	0.17767	0.18905	0.2106	0.07263	0.12604	946	1168
26.344	0.07499	0.07044	0.05411	0.0564	0.14709	0.18084	0.19157	0.21395	0.06932	0.12591	1006	1107
26.372	0.07881	0.06929	0.05306	0.05271	0.14012	0.17815	0.18936	0.22104	0.07377	0.12552	999	1112
26.401	0.07515	0.06662	0.05463	0.05222	0.1436	0.18496	0.19441	0.19605	0.07253	0.13385	985	1065
26.429	0.07268	0.06883	0.05368	0.05286	0.15057	0.18733	0.18842	0.20948	0.07139	0.12318	1036	1168
26.458	0.0761	0.06784	0.05801	0.05112	0.14267	0.18496	0.18621	0.21544	0.06652	0.13307	1002	1157
26.486	0.07324	0.06585	0.05678	0.05406	0.15633	0.17466	0.18794	0.20481	0.06994	0.13424	959	1162
26.515	0.07714	0.0715	0.05301	0.05192	0.14655	0.18052	0.1952	0.21115	0.07429	0.12956	905	1188
26.543	0.07229	0.06799	0.05458	0.05376	0.14575	0.17213	0.19931	0.20519	0.06476	0.12031	923	1122
26.571	0.07149	0.06348	0.05168	0.05177	0.14776	0.17783	0.19583	0.21302	0.07108	0.12565	997	1107
26.6	0.07793	0.06753	0.05301	0.05177	0.14749	0.17941	0.18526	0.21209	0.06901	0.12513	999	1161
26.628	0.07905	0.06784	0.05506	0.05286	0.14695	0.1867	0.18258	0.21899	0.07232	0.13164	940	1122
26.657	0.07419	0.06914	0.05701	0.05396	0.1424	0.17941	0.19173	0.19455	0.07108	0.12813	936	1138
26.685	0.07308	0.07143	0.05539	0.05226	0.13476	0.17102	0.19252	0.20556	0.07274	0.12852	931	1116
26.714	0.07722	0.06937	0.05597	0.05431	0.14066	0.17641	0.19426	0.20948	0.07098	0.12292	971	1167
26.742	0.07634	0.07189	0.05249	0.05495	0.14575	0.18321	0.18652	0.21936	0.07222	0.13008	941	1123
26.771	0.07412	0.0683	0.05296	0.05441	0.14267	0.17625	0.19757	0.21377	0.07357	0.12266	949	1107
26.799	0.07777	0.06921	0.05454	0.05187	0.13731	0.1734	0.19378	0.21358	0.07637	0.13138	951	1085
26.827	0.07777	0.06455	0.05201	0.05296	0.14561	0.17688	0.18573	0.2119	0.07398	0.12552	939	1197
26.856	0.07237	0.06631	0.05406	0.05684	0.13905	0.1726	0.18826	0.20798	0.06776	0.12591	961	1136
26.884	0.07483	0.0686	0.05449	0.05465	0.13891	0.18131	0.19504	0.21787	0.07212	0.1332	957	1134
26.913	0.07746	0.07044	0.05373	0.04983	0.13557	0.17435	0.18858	0.22253	0.06486	0.12135	934	1188
26.941	0.07722	0.06684	0.05363	0.05595	0.14454	0.18828	0.18384	0.216	0.06901	0.13542	935	1146
26.97	0.07427	0.06814	0.05606	0.05361	0.14883	0.17751	0.1881	0.21321	0.07015	0.12539	1000	1098
26.998	0.0738	0.06425	0.05725	0.05202	0.14628	0.1772	0.19931	0.21246	0.07087	0.13242	899	1098
27.027	0.08111	0.06738	0.05425	0.0551	0.13985	0.17435	0.19647	0.2009	0.07491	0.12318	966	1094
27.055	0.07642	0.06883	0.05525	0.05366	0.14642	0.1791	0.18668	0.20145	0.07191	0.13333	985	1106
27.084	0.07594	0.07357	0.0582	0.05336	0.1503	0.18179	0.19078	0.21656	0.07284	0.12526	899	1108
27.112	0.0804	0.06845	0.05925	0.05595	0.13557	0.17561	0.19063	0.20668	0.07844	0.12995	946	1152
27.14	0.08501	0.06906	0.05311	0.05371	0.13932	0.17767	0.19268	0.21731	0.06642	0.11979	930	1139
27.169	0.07976	0.06814	0.05216	0.0563	0.14628	0.1726	0.19268	0.21339	0.07243	0.13047	987	1108
27.197	0.08525	0.06646	0.05397	0.05615	0.14762	0.17767	0.19504	0.20108	0.07346	0.13359	950	1137
27.226	0.08119	0.0673	0.05601	0.05226	0.14468	0.19018	0.19552	0.21395	0.07305	0.13685	1006	1157
27.254	0.0827	0.06578	0.05296	0.05306	0.14682	0.18337	0.19852	0.20612	0.07046	0.13516	931	1114
27.283	0.08533	0.07074	0.05296	0.0548	0.14628	0.17546	0.20167	0.21955	0.06901	0.12813	930	1122
27.311	0.08779	0.07166	0.05316	0.05455	0.14615	0.1886	0.18905	0.20239	0.07543	0.13164	925	1116
27.34	0.08573	0.07334	0.05668	0.05704	0.14468	0.17134	0.19299	0.22253	0.06797	0.13581	904	1211
27.368	0.08565	0.06837	0.05797	0.0564	0.14802	0.181	0.20167	0.21544	0.07336	0.13047	926	1095
27.396	0.0866	0.06547	0.05759	0.0562	0.14548	0.17387	0.19394	0.21656	0.07491	0.1306	905	1144
27.425	0.08087	0.07044	0.0572	0.05271	0.14776	0.18733	0.19773	0.21675	0.07647	0.13672	949	1135
27.453	0.08437	0.07074	0.0572	0.0556	0.14293	0.18543	0.1982	0.22328	0.0745	0.13385	952	1125
27.482	0.08501	0.06883	0.05749	0.05729	0.14789	0.18416	0.19647	0.21489	0.07585	0.12565	971	1157
27.51	0.07738	0.07196	0.05792	0.06048	0.14468	0.17292	0.19489	0.21918	0.07025	0.12786	950	1114
27.539	0.08231	0.07105	0.05806	0.05884	0.14601	0.18686	0.18447	0.2216	0.07554	0.13776	945	1154
27.567	0.07944	0.07128	0.06268	0.05615	0.14843	0.18369	0.20073	0.20742	0.07357	0.12865	935	1119
27.596	0.07905	0.07212	0.06254	0.05958	0.14468	0.17831	0.20183	0.21022	0.07315	0.1362	977	1151
27.624	0.08382	0.06898	0.05978	0.05734	0.14159	0.17546	0.21493	0.20612	0.07367	0.13216	987	1146
27.652	0.07952	0.07227	0.05997	0.06028	0.14829	0.18401	0.19741	0.2091	0.07098	0.13685	960	1095
27.681	0.08247	0.07013	0.06097	0.05948	0.14856	0.17973	0.20846	0.20575	0.0745	0.12656	990	1181
27.709	0.08135	0.07212	0.05897	0.06083	0.14936	0.1829	0.19	0.21414	0.07481	0.13164	951	1141
27.738	0.0831	0.06967	0.06325	0.06068	0.13825	0.17767	0.19773	0.21787	0.07077	0.13438	989	1142
27.766	0.07889	0.06463	0.05825	0.05844	0.14521	0.17767	0.2012	0.22813	0.06797	0.13672	1007	1103
27.795	0.07642	0.06967	0.05825	0.05918	0.14159	0.18527	0.18889	0.21787	0.07201	0.12513	951	1162
27.823	0.07746	0.07227	0.05797	0.05684	0.15003	0.17245	0.19883	0.20686	0.07087	0.12917	937	1150
27.852	0.07682	0.06608	0.05839	0.05769	0.15017	0.17292	0.19678	0.21246	0.07367	0.1276	904	1110
27.88	0.07467	0.07189	0.05668	0.05794	0.14843	0.17894	0.19662	0.21302	0.07274	0.13099	1025	1109
27.909	0.07753	0.07235	0.05535	0.0549	0.14534	0.17846	0.19946	0.2188	0.0716	0.12357	943	1174
27.937	0.07396	0.0686	0.05663	0.05401	0.1503	0.17451	0.19205	0.23447	0.07409	0.12409	892	1121
27.965	0.07308	0.07196	0.0552	0.05948	0.14307	0.17751	0.19568	0.21936	0.07077	0.13047	954	1194
27.994	0.0738	0.06822	0.0573	0.05724	0.14628	0.17751	0.20057	0.22347	0.07844	0.13372	946	1096
28.022	0.07602	0.06914	0.05468	0.05445	0.14722	0.18955	0.20104	0.22626	0.07367	0.12891	933	1141
28.051	0.07467	0.06692	0.05582	0.05714	0.14682	0.18987	0.19426	0.22141	0.07626	0.13607	897	1123
28.079	0.07714	0.07013	0.05601	0.05694	0.15727	0.17181	0.19299	0.21824	0.07885	0.13333	986	1183
28.108	0.07944	0.06562	0.05749	0.05475	0.14414	0.18068	0.19994	0.22123	0.07554	0.1306	988	1090
28.136	0.07586	0.07044	0.05601	0.05455	0.14548	0.17846	0.19678	0.22048	0.07937	0.12904	947	1114
28.165	0.07523	0.07219	0.05568	0.05381	0.14387	0.18131	0.19378	0.22347	0.07978	0.13424	952	1149
28.193	0.07459	0.06875	0.05778	0.05525	0.15392	0.18036	0.19	0.21974	0.07502	0.13047	948	1168
28.221	0.07666	0.07609	0.05773	0.0566	0.14347	0.17926	0.19126	0.20966	0.07574	0.12917	1025	1158
28.25	0.07515	0.07212	0.05525	0.05794	0.1582	0.18321	0.19	0.21489	0.0775	0.13555	957	1151
28.278	0.07849	0.06868	0.05258	0.05495	0.15084	0.19097	0.19978	0.21302	0.0717	0.13568	935	1116
28.307	0.07761	0.0699	0.05992	0.05674	0.14642	0.17989	0.19441	0.21339	0.07398	0.13477	913	1134
28.335	0.08087	0.06715	0.05811	0.0551	0.14293	0.18749	0.19915	0.21227	0.06911	0.12943	979	1137
28.364	0.07936	0.06853	0.0592	0.05714	0.1491	0.18923	0.20499	0.21004	0.07191	0.1362	928	1177
28.392	0.07149	0.07257	0.05692	0.0552	0.14079	0.18052	0.19063	0.22347	0.07315	0.1319	978	1082
28.421	0.07555	0.0683	0.05868	0.06048	0.14334	0.18828	0.19504	0.21563	0.06642	0.13307	979	1146
28.449	0.0726	0.07013	0.05854	0.05669	0.14762	0.17926	0.19599	0.2216	0.06963	0.12721	974	1151
28.477	0.07054	0.07204	0.05873	0.05814	0.14293	0.18797	0.20688	0.21656	0.07419	0.13242	995	1151
28.506	0.07642	0.06898	0.05901	0.0547	0.15526	0.17086	0.19504	0.22123	0.07118	0.13542	970	1126
28.534	0.07746	0.07479	0.06025	0.0565	0.15137	0.181	0.19631	0.22048	0.06984	0.13359	1029	1191
28.563	0.07412	0.07532	0.0603	0.05749	0.15325	0.16421	0.20609	0.22645	0.07108	0.13438	993	1237
28.591	0.07873	0.07051	0.05959	0.05655	0.14749	0.1886	0.19978	0.22384	0.06984	0.13659	938	1213
28.62	0.08294	0.07639	0.06006	0.05774	0.15486	0.18448	0.18952	0.21563	0.07201	0.1349	978	1275
28.648	0.07618	0.07487	0.05982	0.05804	0.1507	0.18781	0.18763	0.22813	0.07543	0.14245	987	1192
28.677	0.08191	0.06929	0.0604	0.06018	0.14923	0.19414	0.19662	0.21694	0.07367	0.13789	1009	1182
28.705	0.07666	0.06975	0.06154	0.05799	0.15285	0.18211	0.19142	0.22216	0.07512	0.1418	1040	1203
28.734	0.0726	0.07066	0.06297	0.06078	0.15177	0.19192	0.19173	0.22123	0.07377	0.13646	979	1222
28.762	0.07467	0.07403	0.0603	0.05948	0.1495	0.19224	0.19678	0.22496	0.07916	0.14401	970	1197
28.79	0.07197	0.07158	0.06001	0.05998	0.14869	0.17181	0.19978	0.22085	0.07543	0.13464	1043	1134
28.819	0.07809	0.07395	0.06059	0.06192	0.15887	0.18702	0.20009	0.22925	0.07927	0.13659	991	1211
28.847	0.0796	0.07319	0.06116	0.05704	0.14762	0.18812	0.19915	0.21265	0.07015	0.13997	996	1261
28.876	0.07292	0.07005	0.06268	0.05819	0.14334	0.17751	0.20199	0.21806	0.07056	0.13737	998	1222
28.904	0.07332	0.07372	0.06187	0.05874	0.14869	0.18527	0.18858	0.22738	0.07481	0.13177	1030	1170
28.933	0.07523	0.07227	0.06173	0.05898	0.15486	0.18686	0.19946	0.22496	0.07108	0.13203	1016	1179
28.961	0.07594	0.0751	0.06287	0.05694	0.14816	0.18401	0.20136	0.21433	0.0745	0.13411	1010	1216
28.99	0.07602	0.07105	0.05768	0.05684	0.15204	0.18765	0.20073	0.22197	0.07222	0.14714	984	1201
29.018	0.07714	0.06891	0.05987	0.05605	0.14642	0.18606	0.19741	0.21806	0.07191	0.13398	962	1167
29.046	0.0796	0.07555	0.06254	0.0557	0.15191	0.19382	0.20073	0.2216	0.07036	0.13294	963	1180
29.075	0.07698	0.07112	0.06459	0.05854	0.1503	0.18274	0.19615	0.21974	0.07357	0.14089	957	1200
29.103	0.07674	0.07196	0.05792	0.05953	0.1574	0.18844	0.19662	0.22011	0.07056	0.13216	999	1198
29.132	0.0765	0.07143	0.05782	0.06182	0.15124	0.1886	0.20877	0.21824	0.0745	0.13333	991	1186
29.16	0.08207	0.07647	0.06063	0.05933	0.14628	0.17957	0.20751	0.21936	0.06984	0.13568	997	1195
29.189	0.07825	0.0738	0.05959	0.05814	0.15204	0.18052	0.20215	0.23018	0.07284	0.13607	978	1287
29.217	0.08	0.06914	0.05968	0.05699	0.14776	0.17846	0.20215	0.22403	0.07668	0.13646	997	1188
29.246	0.07825	0.07066	0.06092	0.05844	0.14977	0.18527	0.19741	0.22701	0.0717	0.13424	986	1213
29.274	0.07889	0.0696	0.06087	0.05789	0.15151	0.18306	0.19994	0.22347	0.07647	0.14688	1006	1281
29.302	0.07984	0.07433	0.05992	0.06088	0.14588	0.18765	0.20246	0.21302	0.07523	0.13112	1027	1234
29.331	0.07952	0.07739	0.05935	0.05819	0.14802	0.18923	0.20499	0.2257	0.07491	0.13411	1013	1201
29.359	0.07841	0.07242	0.06006	0.06421	0.15097	0.18733	0.20357	0.22011	0.08383	0.13594	992	1178
29.388	0.08278	0.07288	0.06101	0.05729	0.15271	0.18606	0.20499	0.22533	0.08497	0.14284	1023	1190
29.416	0.08	0.0715	0.06092	0.05565	0.14722	0.19287	0.19915	0.22589	0.0775	0.13841	1040	1229
29.445	0.07841	0.07624	0.0614	0.05983	0.14749	0.17577	0.20215	0.23317	0.08061	0.1332	1067	1272
29.473	0.08406	0.07143	0.05992	0.06018	0.14293	0.19572	0.20388	0.22589	0.07792	0.13438	1017	1263
29.502	0.08374	0.07395	0.06063	0.06162	0.15137	0.18416	0.20862	0.23186	0.07502	0.14401	1000	1161
29.53	0.08064	0.07884	0.05797	0.06028	0.15754	0.18828	0.19852	0.22608	0.07657	0.13255	1010	1236
29.558	0.08	0.0741	0.06201	0.05625	0.15285	0.18511	0.19931	0.22365	0.07305	0.14674	993	1204
29.587	0.08151	0.0741	0.05773	0.05889	0.14735	0.19002	0.2023	0.22738	0.0746	0.13841	985	1183
29.615	0.08509	0.07471	0.05811	0.05799	0.15271	0.18892	0.20893	0.22813	0.07554	0.14036	983	1296
29.644	0.0769	0.07884	0.05801	0.06013	0.15553	0.20095	0.20783	0.22813	0.07512	0.13594	987	1288
29.672	0.08278	0.07265	0.0602	0.05779	0.15177	0.19002	0.20041	0.23111	0.07574	0.14128	1007	1244
29.701	0.08048	0.07166	0.05973	0.05918	0.15151	0.18638	0.20546	0.23167	0.07367	0.14167	974	1251
29.729	0.07793	0.07548	0.06225	0.06292	0.1436	0.18448	0.20309	0.22962	0.07181	0.14674	998	1211
29.758	0.08048	0.07487	0.05863	0.05839	0.1582	0.19272	0.20656	0.23391	0.07346	0.13698	999	1211
29.786	0.07738	0.07235	0.06178	0.06073	0.15231	0.17846	0.20546	0.23242	0.07232	0.14049	971	1265
29.815	0.0792	0.07349	0.05959	0.05635	0.1495	0.19113	0.21177	0.22272	0.07367	0.15143	995	1255
29.843	0.08231	0.0783	0.05897	0.05953	0.16035	0.19335	0.21035	0.21489	0.07129	0.14258	1009	1250
29.871	0.08278	0.07632	0.06225	0.06053	0.1574	0.1829	0.20341	0.23746	0.07377	0.15794	1031	1141
29.9	0.08064	0.07815	0.06101	0.05889	0.15084	0.19034	0.20956	0.24193	0.07709	0.15872	1096	1237
29.928	0.08087	0.07303	0.05925	0.05754	0.16008	0.19398	0.20262	0.24119	0.07875	0.17943	1054	1285
29.957	0.08024	0.0751	0.05992	0.05789	0.16209	0.20269	0.20909	0.22048	0.07181	0.1612	1028	1254
29.985	0.07698	0.07601	0.06006	0.0559	0.15807	0.18163	0.20656	0.23111	0.07626	0.16628	1040	1183
30.014	0.0831	0.0783	0.05778	0.06277	0.15901	0.18923	0.21035	0.24566	0.07637	0.16458	1030	1283
30.042	0.08326	0.07548	0.05792	0.05655	0.16423	0.19572	0.21414	0.23018	0.07585	0.15586	1017	1262
30.071	0.0808	0.07357	0.05854	0.05754	0.15486	0.18448	0.20088	0.22888	0.07947	0.14753	1014	1278
30.099	0.07976	0.07739	0.06087	0.05794	0.16102	0.20253	0.19867	0.23428	0.07958	0.15013	1023	1268
30.127	0.07857	0.07311	0.0604	0.06272	0.16115	0.19572	0.20798	0.24398	0.07305	0.13958	1047	1216
30.156	0.08366	0.07196	0.06163	0.06013	0.16959	0.18036	0.20988	0.23932	0.07657	0.13958	1002	1290
30.184	0.0835	0.07861	0.06016	0.05973	0.14977	0.19921	0.20909	0.24231	0.07512	0.14727	1090	1294
30.213	0.07905	0.07846	0.06435	0.05933	0.15713	0.19224	0.21019	0.23652	0.07699	0.14674	1045	1213
30.241	0.08111	0.07196	0.06106	0.06127	0.16437	0.19382	0.21761	0.23783	0.07719	0.14779	1102	1249
30.27	0.08072	0.07586	0.06068	0.06043	0.15338	0.18923	0.22061	0.23559	0.07067	0.14128	1049	1265
30.298	0.07817	0.06975	0.05844	0.06162	0.15861	0.18844	0.2173	0.23615	0.07574	0.14036	1061	1246
30.327	0.08183	0.0767	0.06254	0.06058	0.15928	0.1886	0.20767	0.23428	0.07471	0.14245	1055	1261
30.355	0.08095	0.07922	0.05797	0.05684	0.15767	0.19857	0.20341	0.23876	0.07947	0.15313	1103	1274
30.383	0.08254	0.07387	0.06263	0.05874	0.1637	0.19984	0.20956	0.24063	0.07471	0.15091	1042	1255
30.412	0.08628	0.07387	0.06154	0.06117	0.15794	0.20507	0.21114	0.23783	0.07046	0.14063	1039	1267
30.44	0.08056	0.07632	0.06163	0.05983	0.14735	0.19382	0.23323	0.22869	0.07491	0.13672	1021	1253
30.469	0.08294	0.07372	0.06063	0.06033	0.15472	0.20412	0.2184	0.2341	0.07357	0.14674	1020	1181
30.497	0.07952	0.07998	0.06125	0.06172	0.16651	0.1943	0.21872	0.24193	0.07222	0.14271	1004	1244
30.526	0.07849	0.07204	0.0624	0.06461	0.16839	0.19446	0.21698	0.22832	0.07377	0.1543	1095	1244
30.554	0.08119	0.07487	0.06368	0.05933	0.16758	0.20697	0.20862	0.22776	0.07481	0.15091	1018	1255
30.583	0.08064	0.07838	0.06149	0.06192	0.16758	0.19588	0.2083	0.24678	0.07212	0.14531	1093	1292
30.611	0.08334	0.07708	0.06387	0.06147	0.15378	0.18844	0.21114	0.24902	0.07036	0.14323	1052	1231
30.64	0.08358	0.07395	0.06078	0.06282	0.16397	0.20918	0.21682	0.2466	0.0746	0.15	1096	1287
30.668	0.08326	0.07341	0.06178	0.06506	0.17401	0.19541	0.20688	0.25536	0.07419	0.14779	1034	1217
30.696	0.08191	0.07639	0.06182	0.06073	0.16316	0.19335	0.20467	0.2535	0.07263	0.14036	1057	1275
30.725	0.07825	0.08113	0.06449	0.06277	0.16008	0.19588	0.21367	0.24865	0.07139	0.14648	1039	1292
30.753	0.08429	0.07296	0.06125	0.06197	0.16263	0.20048	0.22345	0.25201	0.07388	0.14909	1017	1269
30.782	0.07833	0.07601	0.06187	0.06332	0.15606	0.19778	0.21619	0.25275	0.07305	0.14141	1070	1342
30.81	0.087	0.07395	0.06268	0.06317	0.16584	0.20016	0.21303	0.2507	0.07533	0.14284	1019	1230
30.839	0.08366	0.07448	0.06387	0.06222	0.16075	0.19952	0.22313	0.23615	0.07305	0.15104	993	1303
30.867	0.08541	0.07892	0.06478	0.05913	0.17053	0.19256	0.21887	0.25089	0.07823	0.14909	998	1257
30.896	0.08421	0.07723	0.06073	0.06137	0.16504	0.19652	0.21414	0.23093	0.07222	0.14909	1041	1311
30.924	0.0866	0.07914	0.06106	0.06147	0.16597	0.20127	0.20909	0.24622	0.07409	0.16133	1053	1287
30.952	0.08318	0.08006	0.06178	0.06033	0.15727	0.2	0.22124	0.25368	0.07336	0.14818	1004	1327
30.981	0.08286	0.07846	0.06411	0.06396	0.16597	0.19731	0.21004	0.23913	0.07554	0.14701	1039	1351
31.009	0.08732	0.08159	0.06302	0.06242	0.1637	0.19572	0.21982	0.24342	0.07782	0.15143	1012	1267
31.038	0.08135	0.07953	0.06502	0.06212	0.17227	0.18955	0.2214	0.24398	0.07875	0.15938	1052	1260
31.066	0.08549	0.08083	0.06063	0.06068	0.17522	0.20982	0.21177	0.24268	0.07626	0.15143	1065	1281
31.095	0.08708	0.08021	0.0633	0.06302	0.16691	0.19778	0.21225	0.24604	0.07678	0.14596	1062	1283
31.123	0.08962	0.07762	0.06373	0.06212	0.17214	0.19192	0.21461	0.23615	0.07523	0.15065	1079	1318
31.152	0.0893	0.08098	0.06311	0.06411	0.16839	0.20443	0.21903	0.24436	0.06994	0.16003	1117	1288
31.18	0.08628	0.07548	0.06406	0.06351	0.15928	0.20412	0.22329	0.24193	0.07025	0.15651	1081	1298
31.208	0.08692	0.08556	0.06468	0.06386	0.1653	0.21394	0.21808	0.25051	0.07429	0.15469	1051	1305
31.237	0.08429	0.078	0.06378	0.06536	0.16798	0.20633	0.22408	0.24548	0.07554	0.15534	1028	1340
31.265	0.08692	0.08052	0.06254	0.06421	0.16263	0.2076	0.21698	0.24827	0.07885	0.16367	1084	1302
31.294	0.08875	0.08212	0.06811	0.06376	0.17227	0.20333	0.22771	0.24958	0.07284	0.15964	1016	1401
31.322	0.08668	0.08251	0.06306	0.06511	0.1645	0.20728	0.21698	0.22925	0.0744	0.15872	994	1337
31.351	0.08254	0.0796	0.06082	0.06292	0.16745	0.20855	0.22692	0.24417	0.08227	0.15221	1016	1364
31.379	0.08533	0.0751	0.06473	0.06287	0.17093	0.20095	0.22487	0.24548	0.08289	0.15768	1071	1318
31.408	0.08501	0.0835	0.06563	0.06132	0.17575	0.20412	0.22361	0.24921	0.08424	0.15339	1044	1338
31.436	0.08938	0.07487	0.06244	0.06147	0.17736	0.20174	0.2296	0.25107	0.08414	0.15586	1119	1342
31.465	0.0897	0.07937	0.06611	0.06456	0.17214	0.20333	0.22645	0.25312	0.09004	0.16003	1040	1333
31.493	0.08732	0.07998	0.06578	0.06232	0.17669	0.19731	0.2214	0.2548	0.08082	0.15182	1123	1405
31.521	0.08668	0.08442	0.06606	0.06491	0.16343	0.21061	0.22282	0.24716	0.07585	0.15664	1095	1348
31.55	0.08636	0.08518	0.06621	0.06401	0.16155	0.19826	0.21603	0.24324	0.08061	0.15781	1095	1329
31.578	0.08262	0.07685	0.06606	0.06421	0.17776	0.20966	0.22045	0.24921	0.08155	0.15625	1079	1360
31.607	0.08819	0.08327	0.06549	0.06207	0.16946	0.20808	0.2225	0.26562	0.07864	0.16263	1092	1307
31.635	0.08867	0.08403	0.06768	0.06461	0.16678	0.20269	0.23276	0.2382	0.07833	0.15716	1091	1279
31.664	0.08946	0.07976	0.0694	0.06511	0.17415	0.20554	0.20862	0.24529	0.07429	0.15586	1089	1288
31.692	0.09137	0.08014	0.06797	0.06167	0.16142	0.20269	0.22629	0.24883	0.0688	0.14049	1061	1374
31.721	0.09495	0.08426	0.06873	0.06461	0.16651	0.20776	0.22503	0.24193	0.07357	0.15352	1030	1374
31.749	0.08763	0.08296	0.06411	0.06222	0.16785	0.21568	0.2244	0.25741	0.07098	0.15664	1117	1397
31.777	0.08811	0.08067	0.06797	0.06506	0.17776	0.20364	0.21651	0.25872	0.07284	0.1599	1122	1415
31.806	0.09018	0.08021	0.06387	0.06262	0.16651	0.2133	0.22771	0.24865	0.0802	0.15885	1098	1353
31.834	0.08803	0.07945	0.06616	0.06565	0.16932	0.20396	0.21903	0.25368	0.07605	0.16159	1010	1379
31.863	0.08946	0.07983	0.06597	0.06516	0.17736	0.20618	0.22298	0.25909	0.07388	0.15013	1110	1459
31.891	0.08429	0.07945	0.06473	0.06809	0.17562	0.20903	0.22077	0.24454	0.07771	0.15612	1164	1391
31.92	0.08771	0.08228	0.07059	0.06705	0.17656	0.20649	0.22187	0.26767	0.08186	0.1599	1039	1402
31.948	0.08517	0.08258	0.06768	0.06511	0.1716	0.21504	0.22692	0.26059	0.08403	0.16615	1136	1434
31.977	0.0905	0.08342	0.06363	0.06635	0.16812	0.21124	0.22645	0.26432	0.0832	0.17083	1108	1396
32.005	0.08557	0.08136	0.06649	0.0661	0.17281	0.19557	0.22124	0.25592	0.08237	0.16445	1039	1480
32.033	0.08501	0.08701	0.06854	0.06521	0.17642	0.21679	0.23623	0.25312	0.08175	0.17318	1143	1430
32.062	0.08978	0.08258	0.06702	0.06784	0.1653	0.20158	0.23623	0.27327	0.08258	0.16927	1106	1487
32.09	0.0901	0.08052	0.0674	0.06765	0.17133	0.22249	0.23071	0.25909	0.08103	0.15742	1032	1418
32.119	0.09416	0.08457	0.0654	0.06491	0.16664	0.20649	0.23671	0.26394	0.08041	0.16198	1111	1394
32.147	0.09066	0.08029	0.06764	0.0662	0.17803	0.21013	0.23465	0.2645	0.07678	0.16081	1138	1354
32.176	0.08915	0.08029	0.06587	0.06635	0.16999	0.20158	0.25075	0.27383	0.07574	0.16914	1072	1419
32.204	0.08708	0.08052	0.07006	0.06312	0.18352	0.22549	0.24081	0.26525	0.07978	0.15456	1025	1376
32.233	0.08986	0.08044	0.06706	0.06312	0.18205	0.20428	0.23686	0.26786	0.07263	0.16107	1115	1343
32.261	0.08827	0.08212	0.06525	0.06491	0.17334	0.21853	0.24822	0.26469	0.07212	0.15807	1061	1423
32.289	0.08915	0.0835	0.06825	0.0657	0.17977	0.2133	0.25217	0.26823	0.07295	0.1651	1039	1405
32.318	0.094	0.08182	0.06792	0.06814	0.19236	0.21394	0.25012	0.2798	0.06963	0.16315	1048	1404
32.346	0.08835	0.08289	0.0653	0.06177	0.18915	0.2247	0.26353	0.28875	0.07284	0.16484	1040	1463
32.375	0.09137	0.08365	0.06687	0.06834	0.19035	0.22787	0.2588	0.27383	0.07087	0.16107	1050	1431
32.403	0.08907	0.08403	0.06554	0.06063	0.17937	0.21441	0.24175	0.26469	0.07999	0.1638	1041	1361
32.432	0.08962	0.08571	0.06592	0.0658	0.1779	0.2114	0.23339	0.2729	0.07232	0.16081	1115	1350
32.46	0.09296	0.08174	0.06583	0.0669	0.1783	0.21647	0.22597	0.25443	0.07947	0.16016	1124	1436
32.489	0.08763	0.08167	0.06911	0.06834	0.17991	0.21504	0.23497	0.26059	0.07263	0.1556	1085	1405
32.517	0.09296	0.0796	0.06973	0.06341	0.19022	0.21884	0.23166	0.26506	0.07823	0.16341	1069	1400
32.546	0.08962	0.08105	0.06678	0.06471	0.1712	0.21584	0.23465	0.266	0.08372	0.15534	1114	1383
32.574	0.08978	0.07701	0.06925	0.06551	0.18098	0.2152	0.24349	0.26973	0.08113	0.15651	1103	1374
32.602	0.08803	0.07876	0.06849	0.06152	0.185	0.21124	0.22203	0.2673	0.08465	0.16523	1082	1327
32.631	0.08994	0.08403	0.06773	0.0665	0.18071	0.21061	0.23939	0.24939	0.08859	0.15495	1087	1372
32.659	0.09018	0.08358	0.06602	0.06202	0.17883	0.21821	0.23513	0.2714	0.09512	0.15964	1115	1392
32.688	0.09312	0.08594	0.0683	0.06371	0.17455	0.21694	0.22945	0.26991	0.10123	0.14896	1099	1323
32.716	0.08779	0.08747	0.06702	0.06491	0.18259	0.21473	0.23229	0.27924	0.09958	0.15924	1137	1391
32.745	0.08779	0.08273	0.0693	0.06715	0.17642	0.21489	0.23371	0.26786	0.10009	0.16237	1088	1442
32.773	0.09161	0.0838	0.06854	0.06416	0.18245	0.21267	0.23355	0.27234	0.10859	0.16289	1103	1372
32.802	0.08938	0.08182	0.06787	0.06431	0.19169	0.21979	0.22124	0.2632	0.10103	0.15091	1091	1446
32.83	0.09185	0.08816	0.06954	0.06615	0.17803	0.2274	0.22739	0.26674	0.0945	0.14896	1123	1445
32.858	0.09296	0.08235	0.06554	0.06565	0.1787	0.21457	0.21745	0.2673	0.08984	0.16497	1078	1444
32.887	0.09551	0.08273	0.06787	0.07008	0.1712	0.20697	0.22582	0.26469	0.09004	0.16003	1097	1463
32.915	0.09384	0.08121	0.06945	0.06635	0.18218	0.20808	0.2345	0.25909	0.08745	0.16549	1048	1415
32.944	0.09455	0.07563	0.07206	0.06695	0.1724	0.21504	0.23197	0.25667	0.09522	0.16875	1147	1475
32.972	0.09066	0.08296	0.06987	0.06546	0.185	0.21948	0.24759	0.26525	0.09595	0.17148	1088	1455
33.001	0.0959	0.08205	0.06754	0.0657	0.18861	0.21124	0.23797	0.26674	0.10248	0.175	1129	1366
33.029	0.09137	0.08098	0.06878	0.06655	0.16999	0.20823	0.23513	0.24753	0.09802	0.17214	1116	1430
33.058	0.09447	0.08549	0.06606	0.07003	0.17696	0.20744	0.24696	0.26637	0.1002	0.16523	1042	1386
33.086	0.08954	0.08617	0.06768	0.06675	0.18339	0.20348	0.2326	0.25518	0.08465	0.16823	1089	1431
33.114	0.09726	0.0809	0.06935	0.0656	0.17495	0.21615	0.23623	0.26674	0.08756	0.16523	1176	1409
33.143	0.09304	0.0851	0.06711	0.0662	0.17508	0.20681	0.23355	0.26376	0.07999	0.15599	1152	1406
33.171	0.08978	0.0864	0.0693	0.06595	0.18017	0.20823	0.23544	0.25909	0.07823	0.16172	1104	1367
33.2	0.09185	0.08541	0.06949	0.06526	0.17776	0.22138	0.23718	0.266	0.08662	0.15846	1042	1359
33.228	0.09447	0.08075	0.06925	0.06446	0.18459	0.22138	0.2386	0.26749	0.0887	0.15898	1134	1417
33.257	0.09137	0.08487	0.0694	0.06655	0.1787	0.2209	0.22976	0.27793	0.08942	0.15586	1114	1454
33.285	0.09026	0.08785	0.06778	0.06421	0.18553	0.21378	0.23071	0.26674	0.08538	0.16315	1126	1470
33.314	0.09447	0.08678	0.07249	0.06536	0.17776	0.2095	0.23797	0.26562	0.08414	0.16224	1108	1382
33.342	0.09304	0.09076	0.06859	0.0675	0.18299	0.22217	0.2345	0.25443	0.07989	0.1625	1112	1478
33.371	0.09805	0.09144	0.06792	0.06725	0.18808	0.21061	0.24049	0.27122	0.07668	0.16576	1062	1427
33.399	0.09614	0.09236	0.06797	0.06949	0.18473	0.20918	0.22945	0.25947	0.07906	0.16445	1113	1458
33.427	0.09439	0.08373	0.07226	0.06466	0.18178	0.22312	0.22992	0.27066	0.08548	0.15638	1058	1437
33.456	0.09678	0.08472	0.07287	0.07113	0.18245	0.21869	0.24207	0.27719	0.0888	0.16589	1163	1433
33.484	0.09416	0.08327	0.06783	0.0665	0.17281	0.2171	0.23923	0.2548	0.0973	0.16732	1124	1466
33.513	0.09638	0.08579	0.07073	0.06341	0.18526	0.21409	0.23402	0.26021	0.10786	0.18672	1122	1463
33.541	0.09559	0.08067	0.06868	0.06849	0.17991	0.20903	0.2326	0.26189	0.11646	0.17435	1140	1477
33.57	0.09598	0.08686	0.06945	0.0659	0.17883	0.21172	0.23734	0.26226	0.10838	0.17383	1120	1416
33.598	0.09161	0.08625	0.07059	0.066	0.1779	0.21267	0.23765	0.27215	0.10009	0.15729	1075	1466
33.627	0.09606	0.08472	0.07092	0.06994	0.18526	0.22296	0.23386	0.27887	0.10268	0.1737	1010	1464
33.655	0.09487	0.09343	0.06754	0.06954	0.18406	0.23104	0.24318	0.2645	0.09398	0.16784	1084	1442
33.683	0.09948	0.09236	0.0714	0.0675	0.17964	0.22613	0.23244	0.266	0.08165	0.15846	1049	1462
33.712	0.09901	0.09076	0.07292	0.0671	0.1858	0.21251	0.22266	0.26245	0.07875	0.1694	1087	1408
33.74	0.10068	0.09076	0.0704	0.06869	0.18071	0.2171	0.24917	0.25499	0.07626	0.16068	1091	1358
33.769	0.10235	0.0893	0.07164	0.06605	0.18084	0.21884	0.23592	0.25499	0.07854	0.1668	1088	1419
33.797	0.10759	0.09351	0.06854	0.06645	0.18486	0.22296	0.22945	0.27196	0.07087	0.16016	1140	1412
33.826	0.0994	0.09129	0.07268	0.06874	0.18071	0.22819	0.23197	0.25853	0.07595	0.15872	1142	1380
33.854	0.10266	0.09343	0.07387	0.06804	0.17991	0.20301	0.2255	0.26115	0.07605	0.16484	1090	1404
33.883	0.10068	0.08992	0.07049	0.06934	0.18111	0.21837	0.2468	0.27887	0.07554	0.15755	1045	1413
33.911	0.10441	0.09503	0.07135	0.06894	0.18205	0.21774	0.24554	0.27532	0.07253	0.1543	1142	1351
33.939	0.11125	0.09251	0.07149	0.06924	0.18299	0.21853	0.23623	0.25984	0.07036	0.15625	1127	1444
33.968	0.10799	0.09633	0.06968	0.06819	0.18084	0.21093	0.22519	0.28838	0.07657	0.15768	1051	1440
33.996	0.10712	0.09664	0.07226	0.0676	0.17589	0.21647	0.22976	0.27812	0.07647	0.15924	1069	1358
34.025	0.11078	0.10053	0.07359	0.07008	0.17803	0.21821	0.23497	0.27308	0.0717	0.16471	1138	1462
34.053	0.11913	0.10275	0.07383	0.0668	0.18647	0.2331	0.22392	0.27588	0.06973	0.16094	1102	1438
34.082	0.11523	0.10244	0.06959	0.07173	0.18433	0.21679	0.23576	0.26021	0.07398	0.16341	1079	1401
34.11	0.12151	0.10222	0.07221	0.06864	0.18781	0.22264	0.23686	0.26338	0.07709	0.15911	1098	1377
34.139	0.13272	0.10749	0.0713	0.06994	0.18339	0.22264	0.24381	0.27084	0.07419	0.1569	1064	1338
34.167	0.13328	0.11337	0.07235	0.06775	0.17736	0.2285	0.24759	0.26003	0.0746	0.15846	1123	1450
34.196	0.13869	0.12238	0.07245	0.06839	0.18835	0.22819	0.23718	0.26693	0.07232	0.15924	1047	1475
34.224	0.14911	0.12895	0.07178	0.07073	0.19585	0.21726	0.22377	0.26935	0.07833	0.1599	1040	1400
34.252	0.16111	0.14049	0.07387	0.06735	0.18473	0.21948	0.2345	0.26693	0.07295	0.15924	1082	1496
34.281	0.16684	0.14927	0.07749	0.06869	0.18245	0.21869	0.2446	0.27047	0.0745	0.15586	1073	1433
34.309	0.19451	0.16417	0.07302	0.07466	0.18942	0.2266	0.22392	0.26376	0.07398	0.1651	1078	1454
34.338	0.21066	0.17807	0.07445	0.06839	0.20013	0.22407	0.23528	0.27943	0.07564	0.1668	1134	1503
34.366	0.24406	0.19435	0.07726	0.07307	0.19719	0.23009	0.23181	0.27122	0.07243	0.17083	1128	1492
34.395	0.28946	0.22422	0.08016	0.07456	0.20348	0.23436	0.24586	0.27569	0.07491	0.16302	1104	1469
34.423	0.35547	0.27105	0.07816	0.07601	0.21045	0.23975	0.23592	0.26973	0.07947	0.15768	1118	1496
34.452	0.48596	0.34461	0.07702	0.07466	0.2217	0.2445	0.23276	0.26749	0.08196	0.1625	1082	1429
34.48	0.63889	0.46875	0.07735	0.07795	0.24675	0.26112	0.24254	0.27084	0.09149	0.16237	1119	1444
34.508	0.83539	0.63545	0.08273	0.07546	0.25814	0.26667	0.23655	0.26488	0.08061	0.16367	1078	1434
34.537	0.96676	0.84248	0.08164	0.07909	0.27019	0.28472	0.24412	0.26115	0.08082	0.15898	1092	1451
34.565	1	0.95867	0.08597	0.07332	0.29752	0.28789	0.23955	0.26842	0.07947	0.15729	1089	1480
34.594	0.92732	1	0.08316	0.07875	0.30851	0.31433	0.2416	0.27663	0.07771	0.15573	1145	1383
34.622	0.77583	0.94263	0.08245	0.07566	0.32163	0.31227	0.2386	0.27588	0.07564	0.15742	1096	1520
34.651	0.63793	0.80053	0.0855	0.07914	0.31775	0.32526	0.23481	0.2714	0.07367	0.15911	1069	1347
34.679	0.47284	0.63904	0.08864	0.07875	0.32163	0.32146	0.24475	0.28819	0.06994	0.1569	1054	1419
34.708	0.3639	0.48533	0.09136	0.07954	0.30422	0.33872	0.25659	0.2729	0.07232	0.16406	1106	1419
34.736	0.27316	0.36218	0.08988	0.08372	0.31641	0.33349	0.24633	0.27849	0.0773	0.15208	1184	1405
34.764	0.22083	0.27662	0.09459	0.08298	0.29645	0.32763	0.24286	0.28148	0.07181	0.15924	1071	1399
34.793	0.18227	0.22552	0.09326	0.08298	0.28292	0.32827	0.25091	0.27569	0.06839	0.16484	1098	1410
34.821	0.15984	0.19015	0.09945	0.08596	0.2785	0.32336	0.24633	0.28222	0.07284	0.16224	1100	1406
34.85	0.14799	0.16089	0.10221	0.09044	0.27033	0.33618	0.24428	0.28148	0.07543	0.15898	1116	1345
34.878	0.13471	0.14828	0.10779	0.09059	0.27086	0.34204	0.25296	0.29192	0.07025	0.16081	1043	1425
34.907	0.12867	0.12368	0.11188	0.09144	0.26698	0.33777	0.26038	0.28913	0.07108	0.15573	1064	1443
34.935	0.12159	0.1246	0.1286	0.09756	0.25988	0.34711	0.27253	0.28353	0.07098	0.16836	1074	1425
34.964	0.11698	0.11497	0.13236	0.10294	0.25037	0.33808	0.28105	0.29472	0.07284	0.16068	1086	1360
34.992	0.11427	0.11574	0.14589	0.10926	0.26484	0.34347	0.27631	0.30162	0.06984	0.15313	1125	1414
35.02	0.11189	0.11031	0.15423	0.1219	0.26376	0.33555	0.27789	0.2992	0.07212	0.15964	1085	1356
35.049	0.10529	0.10191	0.17047	0.1324	0.26537	0.34157	0.29415	0.32028	0.06341	0.15586	1075	1421
35.077	0.10425	0.10023	0.19095	0.14301	0.2718	0.33919	0.31797	0.30517	0.0717	0.15078	1067	1435
35.106	0.1041	0.10267	0.21029	0.15834	0.28707	0.35519	0.3265	0.33669	0.07253	0.14857	1071	1322
35.134	0.10616	0.09519	0.24382	0.18034	0.28252	0.3677	0.34464	0.34453	0.07181	0.16263	1079	1418
35.163	0.09948	0.09465	0.28469	0.21578	0.28975	0.36833	0.38709	0.36728	0.07574	0.16159	1118	1383
35.191	0.10203	0.09901	0.35713	0.25898	0.3081	0.38036	0.42591	0.39937	0.07025	0.15859	1066	1394
35.22	0.1041	0.0919	0.43944	0.33718	0.33048	0.39667	0.49124	0.43518	0.06818	0.1638	1085	1471
35.248	0.09654	0.0919	0.55628	0.44136	0.35231	0.42185	0.58056	0.49207	0.07056	0.16354	1106	1423
35.277	0.09423	0.09343	0.71022	0.59139	0.39076	0.44941	0.66309	0.54859	0.07046	0.15729	1074	1375
35.305	0.10322	0.09427	0.85449	0.7561	0.4075	0.4787	0.76329	0.63253	0.07336	0.16302	1082	1399
35.333	0.10441	0.09221	0.95847	0.91553	0.45425	0.5346	0.87549	0.73195	0.07647	0.15833	1078	1467
35.362	0.09336	0.08801	1	1	0.51735	0.59382	0.94382	0.85208	0.07709	0.16055	1114	1334
35.39	0.09193	0.08373	0.93918	0.98392	0.60603	0.70958	1	0.91886	0.07543	0.16159	1083	1366
35.419	0.09551	0.09137	0.80829	0.87909	0.69886	0.81378	0.99463	0.98191	0.06963	0.15872	1051	1420
35.447	0.09678	0.08846	0.66759	0.71453	0.82317	0.87918	0.9394	1	0.06932	0.16003	1085	1493
35.476	0.09654	0.09121	0.52146	0.57422	0.91105	0.9696	0.91084	0.96549	0.07491	0.15625	1130	1396
35.504	0.09511	0.08419	0.38652	0.4116	0.9716	1	0.79927	0.95281	0.06994	0.16667	1042	1422
35.533	0.08978	0.08824	0.28916	0.31254	1	0.96548	0.71737	0.86719	0.07118	0.17292	1029	1403
35.561	0.09471	0.0864	0.22339	0.24251	0.96718	0.94125	0.66009	0.77467	0.07377	0.17122	1044	1399
35.589	0.09567	0.08732	0.18362	0.19308	0.9136	0.8673	0.62632	0.7077	0.07699	0.16549	1081	1484
35.618	0.09765	0.08442	0.14899	0.16262	0.8296	0.76801	0.55799	0.67487	0.07398	0.16693	1105	1510
35.646	0.09209	0.08365	0.13165	0.13917	0.73811	0.67189	0.51381	0.64951	0.07564	0.15846	1079	1483
35.675	0.0928	0.08419	0.12136	0.12962	0.64126	0.58654	0.49755	0.626	0.07574	0.17826	1080	1449
35.703	0.09392	0.08144	0.10636	0.12001	0.54521	0.48646	0.48856	0.59989	0.0744	0.17695	1023	1544
35.732	0.09614	0.08327	0.10274	0.1107	0.45198	0.4342	0.47309	0.57564	0.07616	0.19596	1047	1552
35.76	0.09439	0.0796	0.09821	0.10533	0.39491	0.38179	0.45842	0.56501	0.07543	0.19219	1106	1603
35.789	0.09018	0.0877	0.09893	0.1111	0.33436	0.34901	0.44611	0.55512	0.08735	0.21341	1069	1548
35.817	0.09177	0.08648	0.09255	0.1122	0.29149	0.30752	0.45479	0.53628	0.08341	0.23047	1068	1573
35.845	0.09201	0.08075	0.09397	0.10274	0.2793	0.27648	0.44674	0.51446	0.08704	0.24883	1007	1645
35.874	0.08779	0.08908	0.08316	0.0998	0.24233	0.26619	0.44816	0.49841	0.08548	0.29167	1059	1632
35.902	0.09813	0.08594	0.08388	0.09686	0.24086	0.24513	0.43696	0.4792	0.08973	0.3306	1068	1538
35.931	0.08708	0.09037	0.08392	0.09577	0.20804	0.23975	0.42986	0.48554	0.1002	0.35365	1136	1570
35.959	0.08835	0.0861	0.08011	0.09134	0.19906	0.2407	0.44469	0.46913	0.09978	0.3569	1114	1559
35.988	0.09121	0.08709	0.08188	0.088	0.20161	0.24117	0.43333	0.47752	0.10662	0.34102	1089	1567
36.016	0.08787	0.08678	0.08045	0.08303	0.19678	0.23278	0.43601	0.46465	0.11356	0.32422	1095	1514
36.045	0.09241	0.08862	0.08035	0.08532	0.18419	0.22629	0.43412	0.48386	0.1289	0.31354	1071	1410
36.073	0.09264	0.08587	0.07854	0.08009	0.19638	0.22518	0.44074	0.47864	0.14164	0.33008	1147	1499
36.102	0.09082	0.08892	0.07654	0.08059	0.19076	0.22264	0.43996	0.48237	0.18475	0.42865	1061	1467
36.13	0.09042	0.08808	0.07535	0.07865	0.18567	0.22423	0.43033	0.47752	0.29707	0.6763	1121	1485
36.158	0.09089	0.08762	0.07254	0.07735	0.18138	0.21314	0.42607	0.46279	0.54264	1	1179	1476
36.187	0.08787	0.08801	0.07359	0.07606	0.18459	0.21853	0.42481	0.44507	0.86861	0.98724	1173	1561
36.215	0.08676	0.08663	0.07121	0.077	0.16852	0.22074	0.42055	0.44469	1	0.87852	1128	1520
36.244	0.09193	0.08839	0.0754	0.07685	0.18125	0.21045	0.40697	0.43481	0.85266	0.86081	1140	1516
36.272	0.08946	0.09206	0.0713	0.0771	0.18259	0.21837	0.39293	0.43033	0.72428	0.7582	1216	1543
36.301	0.08819	0.08778	0.06954	0.07875	0.17227	0.20475	0.38252	0.42865	0.64563	0.63581	1222	1521
36.329	0.09034	0.09404	0.07021	0.08009	0.17307	0.22106	0.38883	0.4225	0.51186	0.66484	1342	1580
36.358	0.09042	0.09007	0.07116	0.07685	0.16664	0.21108	0.37889	0.41336	0.47311	0.72461	1381	1696
36.386	0.0866	0.09007	0.07102	0.08352	0.17696	0.2228	0.3811	0.41466	0.54025	0.5888	1349	1678
36.414	0.08652	0.09007	0.07054	0.07785	0.17482	0.2152	0.37463	0.41653	0.57227	0.47747	1385	1690
36.443	0.09559	0.09183	0.06859	0.08059	0.17214	0.2209	0.36658	0.41392	0.45063	0.43294	1521	1756
36.471	0.08573	0.09267	0.06906	0.07914	0.18486	0.22233	0.37226	0.42268	0.36473	0.33398	1615	1736
36.5	0.08421	0.09481	0.0683	0.08118	0.17763	0.21726	0.36389	0.4363	0.29562	0.25352	1810	1861
36.528	0.0835	0.09206	0.06802	0.08228	0.1708	0.22296	0.36863	0.43313	0.20298	0.21289	1980	1891
36.557	0.09042	0.09542	0.07202	0.08318	0.16812	0.23009	0.39735	0.44376	0.1203	0.20117	1976	1961
36.585	0.08541	0.09893	0.07168	0.0891	0.16959	0.2342	0.3833	0.44898	0.09357	0.21367	2202	2100
36.614	0.08533	0.10894	0.06749	0.09253	0.16651	0.22502	0.3994	0.46596	0.08507	0.2069	2196	2263
36.642	0.08167	0.11077	0.06697	0.0998	0.1645	0.24133	0.41897	0.49245	0.0831	0.21159	2209	2364
36.67	0.08239	0.12307	0.06654	0.10448	0.16571	0.26287	0.43443	0.53124	0.07968	0.20247	2232	2492
36.699	0.08851	0.12223	0.06644	0.11324	0.16651	0.26968	0.4783	0.57769	0.08124	0.19427	2151	2599
36.727	0.08628	0.12177	0.06721	0.10931	0.16919	0.26429	0.52627	0.62265	0.07046	0.19727	2024	2706
36.756	0.08024	0.12345	0.06816	0.11648	0.16611	0.25891	0.59934	0.68625	0.07419	0.19922	2012	2760
36.784	0.08445	0.11329	0.06606	0.10946	0.15995	0.25827	0.6694	0.74091	0.07108	0.19805	2037	2662
36.813	0.0862	0.10856	0.06721	0.1103	0.16798	0.26128	0.78002	0.83137	0.06331	0.17839	2038	2721
36.841	0.08636	0.10924	0.06945	0.10159	0.16772	0.25289	0.82373	0.92278	0.06984	0.16107	1960	2683
36.87	0.08254	0.0974	0.06835	0.09925	0.16571	0.24925	0.87186	0.98303	0.06828	0.16875	2049	2593
36.898	0.08008	0.09664	0.0674	0.09472	0.16664	0.23405	0.87644	0.97351	0.06486	0.16654	2094	2678
36.927	0.08533	0.09022	0.06921	0.09179	0.16182	0.23769	0.8403	0.9847	0.07274	0.16471	2094	2832
36.955	0.08406	0.08625	0.06697	0.08586	0.16169	0.23025	0.80827	0.9737	0.06735	0.15013	2090	2760
36.983	0.08342	0.08923	0.06549	0.08153	0.15981	0.22027	0.70948	0.89591	0.06756	0.15781	2194	2807
37.012	0.08406	0.09305	0.0683	0.0785	0.16383	0.20697	0.65331	0.81048	0.06808	0.15638	2368	2853
37.04	0.08469	0.09022	0.06506	0.07596	0.1574	0.2095	0.57646	0.72934	0.07222	0.1474	2628	3099
37.069	0.08223	0.08419	0.06702	0.07456	0.16517	0.21251	0.52012	0.67711	0.06631	0.14492	2728	3332
37.097	0.08382	0.08258	0.06482	0.07576	0.15995	0.20823	0.49629	0.61071	0.07046	0.14349	3178	3937
37.126	0.07984	0.08205	0.0673	0.07257	0.16021	0.20618	0.46205	0.56128	0.06476	0.1457	3939	5072
37.154	0.08286	0.0806	0.06225	0.07203	0.16035	0.20158	0.4155	0.50159	0.06517	0.14792	5489	7454
37.183	0.07889	0.08342	0.06549	0.06809	0.16102	0.19351	0.38015	0.457	0.06642	0.14466	8609	10783
37.211	0.07889	0.0809	0.0643	0.06526	0.16062	0.20491	0.35679	0.41354	0.06663	0.14766	12775	13264
37.239	0.08127	0.08144	0.06373	0.06934	0.15593	0.1924	0.32965	0.41018	0.06258	0.13294	15671	13677
37.268	0.0796	0.07853	0.06387	0.06595	0.15177	0.19462	0.30346	0.38276	0.06445	0.14648	16669	12039
37.296	0.07936	0.07532	0.06949	0.0666	0.15673	0.18955	0.28594	0.34546	0.06911	0.14128	15602	10279
37.325	0.07801	0.07739	0.06159	0.06521	0.16222	0.19398	0.25738	0.30834	0.06383	0.14844	13427	8329
37.353	0.08549	0.07555	0.06468	0.06531	0.16477	0.19208	0.25769	0.28801	0.06497	0.15052	10620	5739
37.382	0.07674	0.07869	0.06297	0.06252	0.15164	0.18638	0.23749	0.28502	0.06435	0.14792	7524	3899
37.41	0.08008	0.07899	0.06549	0.06401	0.1582	0.17894	0.25043	0.27252	0.06321	0.13958	5165	2798
37.439	0.08103	0.0767	0.06282	0.06142	0.15553	0.18195	0.24097	0.26226	0.06538	0.13945	3355	2188
37.467	0.08159	0.07487	0.06568	0.06655	0.15204	0.18511	0.23781	0.27364	0.06134	0.13776	2439	1918
37.495	0.0808	0.07196	0.06549	0.06332	0.1574	0.18591	0.22329	0.26525	0.06331	0.14935	1924	1755
37.524	0.0796	0.0754	0.06673	0.06058	0.16182	0.18401	0.22424	0.27066	0.06569	0.13411	1639	1618
37.552	0.07753	0.07349	0.06678	0.06471	0.16062	0.18939	0.21903	0.24287	0.06248	0.14284	1444	1556
37.581	0.07571	0.07319	0.06802	0.06237	0.15325	0.18591	0.22029	0.24641	0.06673	0.14323	1338	1512
37.609	0.07865	0.07181	0.06611	0.06421	0.14776	0.18131	0.21872	0.23559	0.06383	0.14232	1304	1433
37.638	0.07905	0.07494	0.06521	0.0663	0.15553	0.17941	0.22408	0.24566	0.06321	0.13997	1301	1345
37.666	0.07427	0.07647	0.0633	0.06242	0.14869	0.18543	0.2184	0.25331	0.06559	0.14258	1278	1417
37.695	0.07992	0.07021	0.06392	0.06147	0.15258	0.18401	0.22124	0.25051	0.06507	0.13138	1161	1360
37.723	0.07976	0.07227	0.06406	0.06551	0.15874	0.18385	0.2113	0.24697	0.06331	0.13893	1154	1322
37.751	0.07944	0.06921	0.06254	0.06132	0.15057	0.18717	0.21319	0.23596	0.06683	0.1431	1119	1333
37.78	0.07825	0.0754	0.05982	0.05918	0.15526	0.18036	0.21288	0.22664	0.0601	0.14271	1123	1332
37.808	0.07817	0.06975	0.06001	0.06242	0.14869	0.18163	0.21477	0.24007	0.0658	0.13125	1096	1364
37.837	0.07626	0.07112	0.06187	0.06078	0.15311	0.16944	0.21098	0.23708	0.05813	0.1388	1134	1295
37.865	0.07857	0.07494	0.06187	0.05864	0.14856	0.17846	0.21209	0.24081	0.06258	0.13516	1092	1295
37.894	0.0796	0.07517	0.06259	0.05884	0.14963	0.17957	0.21051	0.23055	0.06165	0.1362	1097	1343
37.922	0.07658	0.07548	0.05935	0.05859	0.14749	0.19018	0.21903	0.23093	0.05844	0.13398	1030	1314
37.951	0.07642	0.07051	0.05616	0.06142	0.1499	0.17815	0.20041	0.21862	0.06279	0.13229	1090	1251
37.979	0.0796	0.06746	0.05892	0.05973	0.15365	0.18131	0.20972	0.23205	0.06186	0.1401	1100	1259
38.008	0.07626	0.07296	0.06263	0.06192	0.15017	0.18084	0.21225	0.22384	0.06362	0.12956	1049	1248
38.036	0.07547	0.07105	0.0604	0.05625	0.14601	0.16849	0.2072	0.24231	0.06559	0.13255	1033	1246
38.064	0.07467	0.06845	0.05854	0.05884	0.14588	0.1726	0.20609	0.2313	0.06134	0.13516	1083	1259
38.093	0.08119	0.06662	0.0613	0.05709	0.14709	0.17767	0.20073	0.23317	0.0602	0.13372	1037	1285
38.121	0.07714	0.07066	0.05925	0.06112	0.15057	0.17451	0.20246	0.23671	0.06103	0.13073	1030	1278
38.15	0.07936	0.0712	0.05725	0.05928	0.14012	0.18416	0.20467	0.23373	0.06134	0.12331	1029	1275
38.178	0.07292	0.07166	0.05558	0.05884	0.14789	0.17055	0.1982	0.22365	0.06155	0.13385	997	1203
38.207	0.0738	0.06715	0.05978	0.05844	0.13945	0.16801	0.19457	0.22141	0.06113	0.13411	1014	1239
38.235	0.07268	0.0696	0.05782	0.05963	0.15111	0.17498	0.20388	0.22701	0.06238	0.13659	956	1197
38.264	0.07563	0.07166	0.06049	0.05928	0.14106	0.17878	0.19899	0.23242	0.06196	0.1293	1003	1210
38.292	0.07785	0.0751	0.06135	0.05779	0.14722	0.1669	0.18337	0.22085	0.06155	0.1293	1029	1272
38.32	0.07658	0.06982	0.05663	0.05679	0.14494	0.17181	0.19536	0.21544	0.05751	0.13464	1009	1253
38.349	0.07523	0.06532	0.06087	0.05784	0.1424	0.17878	0.19789	0.23317	0.0631	0.12643	967	1183
38.377	0.07165	0.06769	0.05873	0.05854	0.14575	0.17957	0.19867	0.22682	0.06041	0.12161	1008	1178
38.406	0.07499	0.07326	0.05582	0.05908	0.14307	0.17656	0.19063	0.22981	0.05948	0.13099	937	1172
38.434	0.07761	0.07288	0.05539	0.05789	0.15338	0.16611	0.19599	0.23447	0.05782	0.13333	997	1225
38.463	0.07276	0.06837	0.06006	0.05844	0.1432	0.17039	0.19931	0.22291	0.05989	0.12565	1039	1204
38.491	0.07085	0.07059	0.05597	0.05844	0.14106	0.1715	0.20262	0.22272	0.05761	0.12487	1055	1211
38.52	0.07531	0.07013	0.0583	0.05749	0.14012	0.1688	0.19915	0.22085	0.05761	0.13177	973	1185
38.548	0.07785	0.0673	0.05911	0.05585	0.14347	0.16041	0.20641	0.21843	0.0629	0.12721	972	1190
38.576	0.07634	0.06692	0.05839	0.05978	0.13891	0.17593	0.1941	0.21656	0.05782	0.13763	930	1153
38.605	0.07046	0.07013	0.05644	0.05834	0.14468	0.17593	0.19347	0.22347	0.06165	0.12734	966	1162
38.633	0.07252	0.07021	0.05859	0.05565	0.13758	0.16485	0.19836	0.21246	0.05657	0.12552	993	1159
38.662	0.0703	0.07044	0.05692	0.0562	0.13985	0.17577	0.20388	0.22029	0.05595	0.1263	1002	1231
38.69	0.07801	0.06967	0.05597	0.05774	0.1491	0.17308	0.19725	0.23428	0.05792	0.11914	968	1141
38.719	0.07245	0.07059	0.05816	0.0556	0.14829	0.16532	0.18337	0.21638	0.05834	0.12826	940	1115
38.747	0.07213	0.07074	0.05578	0.05679	0.1428	0.16785	0.20167	0.22104	0.0603	0.12474	949	1150
38.776	0.0796	0.0673	0.05554	0.05943	0.13771	0.1601	0.20041	0.21992	0.05896	0.12344	954	1128
38.804	0.073	0.06539	0.05601	0.055	0.15378	0.17371	0.17863	0.22347	0.05606	0.12826	950	1226
38.833	0.07507	0.06562	0.05416	0.05366	0.14387	0.1707	0.18968	0.21004	0.05647	0.12344	990	1162
38.861	0.08016	0.06639	0.05578	0.055	0.14119	0.17086	0.2023	0.20854	0.05803	0.12513	979	1141
38.889	0.07125	0.0683	0.05673	0.05441	0.13717	0.17371	0.178	0.2175	0.0601	0.12448	939	1118
38.918	0.07022	0.06753	0.05335	0.05689	0.14401	0.17213	0.18463	0.2216	0.05948	0.12383	965	1146
38.946	0.07245	0.06608	0.05411	0.05729	0.14159	0.16991	0.19205	0.2272	0.05968	0.12539	940	1151
38.975	0.07571	0.06822	0.05254	0.0553	0.13838	0.17862	0.18905	0.21712	0.0574	0.11823	913	1143
39.003	0.07618	0.06188	0.05801	0.05749	0.1357	0.16801	0.18952	0.22738	0.06227	0.12057	970	1112
39.032	0.06855	0.06578	0.05377	0.05605	0.13382	0.16675	0.1911	0.2147	0.05927	0.12201	864	1074
39.06	0.07586	0.06753	0.05306	0.05585	0.13945	0.1639	0.187	0.2188	0.05243	0.12188	891	1149
39.089	0.07427	0.067	0.05558	0.05326	0.13329	0.1639	0.20057	0.21824	0.05854	0.12253	893	1173
39.117	0.07658	0.06639	0.05525	0.05331	0.13409	0.16643	0.19662	0.22906	0.05657	0.12461	920	1164
39.145	0.07507	0.0696	0.05373	0.05316	0.1349	0.15265	0.19	0.22011	0.0602	0.12995	926	1138
39.174	0.07221	0.06914	0.05463	0.05391	0.13744	0.16374	0.1881	0.21171	0.06082	0.11406	933	1089
39.202	0.07579	0.07074	0.0532	0.05416	0.13744	0.15835	0.18368	0.2175	0.05378	0.12813	934	1101
39.231	0.07332	0.06807	0.05668	0.05595	0.13744	0.16627	0.19047	0.21339	0.05823	0.1194	886	1125
39.259	0.0765	0.06043	0.05544	0.05749	0.13356	0.16595	0.19836	0.2078	0.0574	0.12422	917	1110
39.288	0.07101	0.06333	0.05449	0.05689	0.14534	0.1696	0.19741	0.20686	0.05575	0.12279	908	1157
39.316	0.073	0.06814	0.05701	0.05361	0.13396	0.16089	0.19031	0.20668	0.05792	0.12943	941	1126
39.345	0.07507	0.06578	0.05787	0.05505	0.1349	0.16611	0.20404	0.23205	0.05595	0.1207	941	1088
39.373	0.07666	0.06356	0.05397	0.05336	0.13758	0.16025	0.1911	0.2341	0.05523	0.12461	891	1092
39.401	0.08167	0.066	0.05282	0.05082	0.1365	0.15867	0.19725	0.23671	0.05803	0.12448	887	1091
39.43	0.07093	0.06501	0.05716	0.05674	0.13476	0.15519	0.18921	0.23802	0.05533	0.12083	881	1049
39.458	0.07579	0.06501	0.05263	0.0546	0.13302	0.16817	0.18211	0.24063	0.05906	0.12044	882	1037
39.487	0.07308	0.06455	0.05444	0.05455	0.12646	0.1631	0.18021	0.22981	0.05647	0.12096	882	1078
39.515	0.07435	0.06478	0.05439	0.05301	0.1278	0.15629	0.17469	0.21694	0.05678	0.12083	968	1061
39.544	0.07332	0.07089	0.05497	0.05605	0.12887	0.15756	0.1769	0.20612	0.05347	0.11471	912	1105
39.572	0.07133	0.06723	0.05468	0.05635	0.12686	0.15028	0.18479	0.20929	0.04891	0.12474	904	1029
39.601	0.07149	0.06776	0.0543	0.05082	0.12967	0.15265	0.187	0.21209	0.05492	0.12135	869	1101
39.629	0.07483	0.06066	0.0543	0.05331	0.12445	0.1574	0.18337	0.20612	0.05481	0.1207	878	1105
39.657	0.07348	0.05875	0.05501	0.05356	0.12833	0.16073	0.18289	0.205	0.05388	0.11862	860	1067
39.686	0.07459	0.05974	0.05539	0.05137	0.12632	0.15408	0.19804	0.20257	0.05347	0.11211	998	986
39.714	0.07252	0.06142	0.05635	0.0547	0.1286	0.17197	0.18321	0.19381	0.05709	0.11576	890	1054
39.743	0.06974	0.066	0.05654	0.05341	0.13007	0.14838	0.17579	0.1953	0.05761	0.11667	929	1091
39.771	0.06775	0.06417	0.05616	0.05411	0.13758	0.15534	0.18321	0.20052	0.05554	0.11589	843	1084
39.8	0.0734	0.06524	0.05535	0.05475	0.13396	0.16516	0.18116	0.20052	0.05678	0.12279	899	998
39.828	0.06879	0.06539	0.05435	0.05505	0.13275	0.15424	0.18258	0.21806	0.06507	0.11615	918	1015
39.857	0.07038	0.0602	0.05377	0.0562	0.13476	0.15059	0.18258	0.20313	0.06331	0.11406	933	999
39.885	0.07101	0.06134	0.05435	0.05291	0.12659	0.15091	0.18542	0.21321	0.07015	0.1237	887	1022
39.914	0.07078	0.06249	0.05292	0.05376	0.12592	0.15867	0.18368	0.19922	0.06435	0.11354	894	974
39.942	0.06616	0.0628	0.05106	0.05391	0.12847	0.1601	0.18763	0.20201	0.05823	0.1151	911	1063
39.97	0.06767	0.06539	0.0533	0.05261	0.12873	0.13888	0.17974	0.19287	0.05709	0.1082	846	1023
39.999	0.06775	0.06012	0.05216	0.04988	0.12177	0.14996	0.18274	0.19231	0.05595	0.11289	867	1070
40.027	0.06608	0.06562	0.05216	0.05077	0.13182	0.14711	0.17185	0.1815	0.05595	0.11341	840	1081
40.056	0.06513	0.06432	0.05473	0.05306	0.12311	0.15075	0.18431	0.19567	0.05284	0.11341	892	1098
40.084	0.07117	0.0628	0.05273	0.05236	0.11869	0.14695	0.18305	0.18896	0.05243	0.11172	835	997
40.113	0.06736	0.06241	0.05325	0.05202	0.12525	0.14616	0.18053	0.19381	0.05388	0.11549	856	1042
40.141	0.06855	0.05859	0.0552	0.0545	0.11601	0.14109	0.17311	0.19996	0.0517	0.11198	919	1105
40.17	0.06982	0.06127	0.0552	0.0545	0.13182	0.15819	0.187	0.1981	0.05036	0.11784	884	942
40.198	0.06751	0.0589	0.05096	0.04913	0.12699	0.15012	0.17406	0.19623	0.05616	0.11445	856	1082
40.226	0.0641	0.06119	0.04949	0.05017	0.12378	0.14885	0.17043	0.19343	0.05461	0.10794	883	1076
40.255	0.06243	0.06532	0.05196	0.05087	0.12672	0.14093	0.17958	0.18392	0.05316	0.10781	919	1012
40.283	0.06497	0.06394	0.05311	0.05037	0.12994	0.13634	0.17532	0.19362	0.05336	0.11341	920	1063
40.312	0.06569	0.06387	0.05454	0.04853	0.12204	0.14806	0.18068	0.18802	0.05233	0.11055	842	1000
40.34	0.06036	0.05966	0.04882	0.05122	0.11695	0.13951	0.17153	0.18672	0.04932	0.10794	907	1011
40.369	0.06076	0.06043	0.05125	0.04898	0.12163	0.14283	0.17784	0.19418	0.05191	0.10664	838	1013
40.397	0.06529	0.06119	0.05077	0.05132	0.12498	0.13777	0.17248	0.19045	0.0545	0.11081	844	1010
40.426	0.06195	0.05966	0.05158	0.05122	0.13115	0.14616	0.1709	0.20183	0.05305	0.11159	824	1061
40.454	0.06258	0.0602	0.05087	0.04928	0.12686	0.14822	0.17406	0.17888	0.05295	0.11198	844	1030
40.482	0.06577	0.0628	0.05216	0.05112	0.12123	0.15408	0.1679	0.19176	0.05554	0.10846	840	976
40.511	0.06537	0.05966	0.05006	0.05316	0.12485	0.15059	0.17074	0.19605	0.05657	0.11016	846	970
40.539	0.06807	0.05844	0.05106	0.05182	0.114	0.13872	0.16885	0.18672	0.05233	0.10586	851	1016
40.568	0.06815	0.05837	0.0513	0.04918	0.11775	0.14759	0.17216	0.18989	0.05388	0.10768	816	985
40.596	0.06616	0.05691	0.05358	0.04783	0.11721	0.15059	0.16806	0.19455	0.05461	0.10794	820	941
40.625	0.07109	0.05516	0.05335	0.04858	0.12659	0.15281	0.17311	0.1925	0.0516	0.10599	840	979
40.653	0.06274	0.06081	0.05235	0.04649	0.12324	0.15661	0.16743	0.19605	0.05129	0.10859	852	1051
40.682	0.06728	0.05921	0.05101	0.04709	0.12351	0.13207	0.17011	0.19698	0.04932	0.10365	896	1036
40.71	0.06354	0.0576	0.05096	0.04938	0.12056	0.14584	0.17264	0.1994	0.05388	0.10977	872	1014
40.739	0.06704	0.05966	0.05177	0.04764	0.1294	0.14173	0.1679	0.20015	0.04994	0.10651	844	931
40.767	0.06362	0.05676	0.05015	0.04983	0.1148	0.14283	0.17343	0.19101	0.05202	0.10378	865	989
40.795	0.06139	0.05455	0.05035	0.05042	0.12029	0.14109	0.16822	0.18504	0.05253	0.10208	901	1027
40.824	0.06187	0.05462	0.05111	0.05107	0.12137	0.14347	0.16853	0.19082	0.05191	0.10677	811	974
40.852	0.05901	0.05982	0.04968	0.04898	0.11547	0.14616	0.15749	0.18392	0.05056	0.10039	802	1039
40.881	0.0625	0.05508	0.05001	0.04888	0.11628	0.1403	0.16159	0.18112	0.04901	0.10143	858	1024
40.909	0.06322	0.05806	0.05149	0.04843	0.11065	0.13824	0.16175	0.18224	0.05378	0.10052	842	1010
40.938	0.06386	0.05691	0.04844	0.04774	0.11896	0.14774	0.17516	0.18373	0.05129	0.10417	864	1032
40.966	0.06068	0.05997	0.04911	0.05027	0.1282	0.14078	0.1739	0.17534	0.0516	0.10495	860	1006
40.995	0.06091	0.05615	0.05082	0.04569	0.11212	0.15218	0.17106	0.18821	0.05264	0.09805	798	968
41.023	0.06044	0.05577	0.0512	0.04729	0.11199	0.1365	0.15654	0.18579	0.04808	0.10026	800	1006
41.051	0.06203	0.06234	0.05015	0.04574	0.11802	0.13808	0.16632	0.18056	0.05585	0.09753	838	967
41.08	0.06044	0.05714	0.05101	0.04788	0.12284	0.13761	0.16538	0.17926	0.0517	0.10794	781	1007
41.108	0.05773	0.05546	0.05144	0.04764	0.11882	0.13729	0.16917	0.16918	0.05316	0.10169	822	980
41.137	0.06099	0.05928	0.04754	0.04928	0.11427	0.14616	0.16412	0.19101	0.0488	0.10378	818	967
41.165	0.06052	0.05814	0.04877	0.04674	0.11869	0.13508	0.15891	0.18262	0.05305	0.10352	783	954
41.194	0.05948	0.05477	0.05168	0.05017	0.11695	0.13682	0.16112	0.18094	0.04611	0.10755	809	940
41.222	0.06195	0.05745	0.04782	0.04918	0.10663	0.13555	0.1638	0.18112	0.05316	0.09609	854	918
41.251	0.0598	0.06005	0.05063	0.04873	0.11654	0.14157	0.16506	0.18709	0.05253	0.10807	828	993
41.279	0.0625	0.05508	0.05292	0.05012	0.11105	0.13824	0.16443	0.19026	0.04829	0.10052	774	988
41.307	0.06195	0.05852	0.05092	0.04968	0.11829	0.13603	0.16459	0.18635	0.04849	0.10182	764	998
41.336	0.06258	0.05584	0.04954	0.04873	0.11587	0.14062	0.16759	0.18747	0.05398	0.10273	822	952
41.364	0.05924	0.05814	0.04958	0.05117	0.11494	0.14157	0.16964	0.18541	0.05088	0.10404	811	929
41.393	0.06227	0.05302	0.04996	0.04639	0.11949	0.1403	0.16033	0.19064	0.05264	0.10443	878	905
41.421	0.06656	0.05775	0.0503	0.04913	0.10918	0.13587	0.16696	0.18765	0.04829	0.10234	816	944
41.45	0.05742	0.05623	0.05001	0.05047	0.11641	0.13808	0.16096	0.19138	0.05139	0.10326	798	971
41.478	0.06099	0.05913	0.04968	0.04883	0.10944	0.13983	0.15559	0.18635	0.05357	0.10208	822	966
41.507	0.05996	0.05569	0.04873	0.05132	0.1081	0.12969	0.15828	0.19101	0.05429	0.10521	802	939
41.535	0.05877	0.05508	0.05349	0.05027	0.11186	0.13428	0.15859	0.18429	0.05336	0.10573	805	967
41.564	0.06147	0.0547	0.04954	0.04704	0.1144	0.12732	0.15701	0.1912	0.05388	0.10143	844	959
41.592	0.06044	0.05974	0.05139	0.04808	0.11413	0.12937	0.16569	0.18224	0.05885	0.0944	869	994
41.62	0.06298	0.0573	0.05511	0.04923	0.11427	0.13428	0.16569	0.18989	0.06238	0.09974	780	987
41.649	0.06052	0.05401	0.05201	0.04928	0.10476	0.13555	0.15922	0.19157	0.06403	0.10352	812	882
41.677	0.05638	0.05523	0.05425	0.05077	0.11145	0.13017	0.15843	0.18373	0.06176	0.09818	787	910
41.706	0.05638	0.05477	0.0532	0.04918	0.11333	0.13413	0.16017	0.17627	0.05678	0.09466	847	954
41.734	0.06076	0.05355	0.0532	0.05271	0.10596	0.13207	0.15133	0.18691	0.05854	0.10013	813	1017
41.763	0.05638	0.0534	0.0583	0.05246	0.11052	0.11971	0.16759	0.18336	0.05284	0.09674	747	973
41.791	0.06036	0.05485	0.05992	0.0548	0.11052	0.13317	0.16475	0.18019	0.05305	0.09792	784	964
41.82	0.0629	0.056	0.05863	0.05789	0.11614	0.13397	0.16475	0.17907	0.05854	0.09128	789	928
41.848	0.05845	0.05264	0.06154	0.0558	0.11561	0.13222	0.16885	0.18635	0.05305	0.1043	760	946
41.876	0.05829	0.05722	0.06035	0.05829	0.1144	0.12573	0.16664	0.18094	0.04984	0.09935	787	972
41.905	0.0602	0.05248	0.06335	0.0561	0.11266	0.13444	0.17485	0.19101	0.05222	0.09753	779	929
41.933	0.05614	0.056	0.0562	0.05485	0.10931	0.1308	0.16774	0.18989	0.05129	0.09974	812	937
41.962	0.05781	0.05707	0.05639	0.05545	0.10891	0.1346	0.16096	0.18094	0.04849	0.10573	852	897
41.99	0.05829	0.05141	0.05473	0.05296	0.10743	0.12652	0.16995	0.18355	0.04849	0.09492	763	938
42.019	0.06044	0.05523	0.05163	0.05281	0.10476	0.13032	0.17279	0.19325	0.04735	0.08867	837	911
42.047	0.05686	0.05859	0.05163	0.05007	0.11145	0.13365	0.15875	0.18541	0.0486	0.09479	780	940
42.076	0.05789	0.055	0.04911	0.05097	0.10998	0.12747	0.17137	0.17646	0.05036	0.10013	788	888
42.104	0.05583	0.05607	0.05273	0.04774	0.11239	0.12589	0.17201	0.19511	0.05067	0.09779	806	879
42.132	0.05948	0.05195	0.05073	0.04918	0.10663	0.12589	0.1668	0.18262	0.04891	0.09349	759	879
42.161	0.05598	0.05317	0.04982	0.04729	0.1065	0.12114	0.1567	0.17665	0.04683	0.08984	788	925
42.189	0.05869	0.05271	0.04639	0.0445	0.1148	0.12763	0.15922	0.17665	0.04787	0.10638	770	897
42.218	0.0602	0.05248	0.04854	0.0449	0.099	0.12953	0.15338	0.18224	0.0458	0.09076	783	888
42.246	0.05885	0.05508	0.0462	0.05022	0.10998	0.12272	0.16017	0.18224	0.04414	0.09063	756	888
42.275	0.05384	0.05592	0.0513	0.04823	0.10288	0.12478	0.16459	0.18672	0.0488	0.09284	729	928
42.303	0.0594	0.05875	0.04644	0.04684	0.10703	0.13096	0.16585	0.17814	0.05212	0.10247	780	924
42.332	0.06099	0.05462	0.04701	0.0451	0.10596	0.13112	0.1436	0.17888	0.05191	0.09635	797	950
42.36	0.0563	0.05279	0.04825	0.04793	0.10395	0.12621	0.15544	0.1815	0.05129	0.1056	762	907
42.388	0.05964	0.05722	0.04815	0.04475	0.10851	0.12557	0.15591	0.169	0.04766	0.10534	782	924
42.417	0.05893	0.05775	0.0472	0.04435	0.11025	0.12637	0.16033	0.17068	0.04787	0.1013	782	965
42.445	0.05948	0.05462	0.04449	0.04843	0.11119	0.1289	0.15354	0.17124	0.05139	0.10286	792	891
42.474	0.05805	0.05661	0.04796	0.045	0.1077	0.12431	0.15054	0.17926	0.04652	0.10169	771	921
42.502	0.06219	0.05523	0.04858	0.04564	0.10074	0.12557	0.15386	0.17198	0.04715	0.09323	767	962
42.531	0.05869	0.056	0.04687	0.04679	0.11266	0.12019	0.1537	0.16769	0.04818	0.10169	822	926
42.559	0.06473	0.05661	0.04544	0.04584	0.10703	0.12747	0.15607	0.16434	0.04435	0.1026	788	913
42.588	0.06489	0.05661	0.04482	0.0442	0.1069	0.12288	0.1567	0.16396	0.04373	0.09388	777	917
42.616	0.06497	0.05806	0.04449	0.0442	0.11346	0.12811	0.16049	0.16527	0.04808	0.09505	754	897
42.645	0.06775	0.06341	0.04334	0.0449	0.09993	0.12225	0.15623	0.16452	0.04621	0.09622	799	898
42.673	0.07435	0.0628	0.04796	0.05037	0.10368	0.127	0.15196	0.17814	0.04601	0.0931	790	844
42.701	0.07555	0.0683	0.04711	0.04505	0.1073	0.12937	0.16017	0.18094	0.0516	0.09284	797	823
42.73	0.09288	0.07555	0.04673	0.04629	0.11145	0.11924	0.16001	0.16732	0.04994	0.08724	787	907
42.758	0.10688	0.08174	0.04168	0.04535	0.10824	0.12573	0.14376	0.17907	0.04673	0.10078	799	916
42.787	0.11117	0.09901	0.04339	0.04719	0.10998	0.12573	0.15228	0.16452	0.04466	0.09805	838	923
42.815	0.11586	0.10779	0.04639	0.0442	0.11748	0.12747	0.15559	0.16881	0.04891	0.09115	771	914
42.844	0.11936	0.11123	0.04539	0.04674	0.11199	0.12352	0.15102	0.18	0.04228	0.08932	762	924
42.872	0.11388	0.11161	0.04396	0.04858	0.11239	0.12747	0.15149	0.18168	0.05077	0.09167	839	867
42.901	0.10028	0.10397	0.04744	0.04266	0.11132	0.12146	0.15086	0.17777	0.04777	0.09531	839	903
42.929	0.09694	0.09641	0.04401	0.04704	0.11413	0.13302	0.14565	0.17571	0.04766	0.09648	801	895
42.957	0.08159	0.08946	0.04596	0.0451	0.11413	0.13777	0.14407	0.17217	0.04538	0.08711	782	915
42.986	0.07833	0.08144	0.04472	0.04694	0.11346	0.13872	0.1496	0.18075	0.04528	0.09258	798	881
43.014	0.0695	0.0712	0.04211	0.0434	0.11132	0.13127	0.14818	0.16564	0.04663	0.09674	781	934
43.043	0.06791	0.06898	0.04611	0.04345	0.10489	0.13222	0.16222	0.16359	0.05326	0.10143	788	925
43.071	0.06394	0.06257	0.04492	0.04584	0.11172	0.12652	0.14581	0.1621	0.04974	0.08932	770	835
43.1	0.06052	0.05814	0.0473	0.04296	0.11842	0.13254	0.15954	0.16844	0.04994	0.09583	798	884
43.128	0.05901	0.05699	0.04525	0.04525	0.11788	0.1384	0.16285	0.17124	0.0459	0.08815	766	910
43.157	0.05805	0.05546	0.04291	0.04769	0.11373	0.13634	0.14976	0.16788	0.05108	0.08841	806	907
43.185	0.05829	0.05393	0.04401	0.0436	0.11132	0.13508	0.15086	0.16974	0.04746	0.08581	799	849
43.213	0.05726	0.05164	0.04468	0.04674	0.10596	0.13064	0.15291	0.16322	0.05046	0.09583	791	887
43.242	0.05813	0.0534	0.04568	0.04281	0.10757	0.13698	0.14865	0.17124	0.04538	0.08464	765	873
43.27	0.05447	0.05592	0.04339	0.0454	0.10462	0.13698	0.15007	0.16695	0.04632	0.09023	749	876
43.299	0.05757	0.05661	0.04458	0.04883	0.10435	0.13001	0.15465	0.16844	0.0458	0.09349	767	795
43.327	0.05964	0.05355	0.04472	0.0442	0.10248	0.13064	0.15417	0.16228	0.04362	0.09219	776	869
43.356	0.05797	0.05332	0.04549	0.04654	0.10382	0.127	0.14755	0.16751	0.04756	0.09349	739	852
43.384	0.0575	0.05355	0.04582	0.04475	0.1002	0.12827	0.14644	0.16807	0.04424	0.0888	740	885
43.413	0.05821	0.05348	0.04396	0.04749	0.10516	0.12494	0.15228	0.16322	0.0459	0.0918	741	872
43.441	0.05543	0.05363	0.04663	0.045	0.10676	0.13555	0.14613	0.1634	0.04663	0.09284	775	900
43.47	0.06155	0.05111	0.04458	0.04644	0.1144	0.1327	0.15749	0.16172	0.04932	0.08789	751	906
43.498	0.05638	0.05141	0.04634	0.04689	0.11199	0.13001	0.15528	0.17254	0.0517	0.08607	750	917
43.526	0.05503	0.05271	0.04387	0.0453	0.11775	0.12573	0.15244	0.18019	0.04632	0.08438	787	868
43.555	0.05463	0.05157	0.04811	0.04594	0.1081	0.13397	0.1597	0.16918	0.04611	0.09167	770	916
43.583	0.05694	0.05241	0.04549	0.0437	0.1144	0.13745	0.15496	0.16713	0.04632	0.08932	759	926
43.612	0.05829	0.05202	0.04682	0.04579	0.11815	0.14078	0.15212	0.17086	0.04476	0.09049	772	863
43.64	0.05264	0.05065	0.04796	0.04679	0.12137	0.14283	0.15354	0.17273	0.04839	0.08945	747	910
43.669	0.05535	0.05309	0.04849	0.04629	0.11507	0.14568	0.16317	0.17571	0.05191	0.0957	789	868
43.697	0.05527	0.05195	0.05249	0.04594	0.11909	0.13476	0.16033	0.16116	0.04538	0.08906	746	873
43.726	0.05869	0.05554	0.05244	0.05127	0.12753	0.14568	0.15733	0.17329	0.04891	0.09206	744	865
43.754	0.05312	0.05073	0.05601	0.05291	0.13115	0.14727	0.15907	0.16918	0.05005	0.0931	724	868
43.782	0.05312	0.05241	0.05854	0.05669	0.13918	0.15059	0.16049	0.18206	0.0458	0.08945	760	847
43.811	0.05304	0.05202	0.05844	0.05485	0.14307	0.15994	0.16238	0.17739	0.0486	0.0931	799	855
43.839	0.05416	0.05103	0.05639	0.05849	0.14481	0.1726	0.16238	0.17422	0.04538	0.09388	791	856
43.868	0.05638	0.05034	0.05473	0.05421	0.15727	0.17799	0.16569	0.17758	0.04766	0.08984	801	940
43.896	0.05455	0.05149	0.05287	0.05401	0.15954	0.19794	0.15954	0.18336	0.04611	0.08281	770	885
43.925	0.05583	0.05088	0.05516	0.05102	0.17267	0.21663	0.1679	0.17777	0.04476	0.08958	775	866
43.953	0.0567	0.05867	0.0503	0.05381	0.19129	0.21615	0.16475	0.17366	0.04683	0.09076	773	819
43.982	0.05471	0.04958	0.0463	0.04943	0.20589	0.22993	0.16285	0.16527	0.04818	0.08359	716	917
44.01	0.05177	0.04943	0.04854	0.04988	0.22612	0.22518	0.15465	0.17236	0.04621	0.09583	787	891
44.038	0.05376	0.05157	0.05001	0.04868	0.21259	0.25257	0.15591	0.17944	0.04549	0.08802	735	842
44.067	0.05781	0.05256	0.04796	0.0445	0.22264	0.22866	0.15244	0.18056	0.04414	0.08672	759	884
44.095	0.05439	0.04966	0.04558	0.04604	0.2205	0.22407	0.16064	0.18243	0.04797	0.09219	736	868
44.124	0.0563	0.0518	0.0463	0.0444	0.20415	0.22692	0.16664	0.17142	0.0487	0.08893	775	896
44.152	0.05662	0.04943	0.04468	0.04674	0.20067	0.21219	0.15118	0.17795	0.04476	0.09167	770	821
44.181	0.05463	0.05042	0.04411	0.04609	0.18446	0.1962	0.14471	0.17441	0.04829	0.08906	740	862
44.209	0.05328	0.05141	0.04487	0.0443	0.17321	0.18844	0.14628	0.1787	0.05077	0.09427	777	880
44.238	0.05511	0.04851	0.04449	0.04321	0.16236	0.16706	0.15433	0.17142	0.04891	0.09154	719	899
44.266	0.05177	0.05164	0.04382	0.04166	0.14561	0.16295	0.15354	0.1787	0.04663	0.0862	720	824
44.295	0.05328	0.05149	0.04544	0.0449	0.14213	0.15709	0.1578	0.18187	0.04683	0.09154	719	791
44.323	0.05066	0.04905	0.04387	0.04664	0.14347	0.15582	0.16191	0.17086	0.0517	0.09544	787	872
44.351	0.05479	0.05195	0.04534	0.0455	0.12873	0.14568	0.15212	0.16639	0.04797	0.09661	763	832
44.38	0.0571	0.04882	0.04139	0.04425	0.1211	0.13492	0.15244	0.1703	0.04621	0.09648	766	855
44.408	0.05463	0.04973	0.04168	0.04564	0.11882	0.13761	0.15039	0.18168	0.0486	0.09622	732	882
44.437	0.054	0.05065	0.04382	0.04156	0.11949	0.13413	0.1526	0.17292	0.04663	0.09688	710	885
44.465	0.05145	0.04927	0.04496	0.04335	0.11333	0.13381	0.15307	0.1703	0.04963	0.09961	735	845
44.494	0.05702	0.05126	0.04439	0.04505	0.10596	0.12684	0.14976	0.17702	0.04901	0.10833	732	847
44.522	0.05328	0.0508	0.04258	0.04778	0.10676	0.1289	0.15623	0.1703	0.04839	0.10872	734	859
44.551	0.05233	0.04675	0.04606	0.04271	0.10315	0.12288	0.15449	0.18224	0.04901	0.11289	786	881
44.579	0.05042	0.05118	0.04144	0.04415	0.11078	0.11481	0.1507	0.17385	0.04849	0.1082	719	839
44.607	0.05734	0.04897	0.04177	0.04505	0.10342	0.12906	0.15812	0.17441	0.04818	0.10742	766	883
44.636	0.05408	0.04729	0.04477	0.04236	0.10583	0.11892	0.15859	0.18467	0.05523	0.10365	766	867
44.664	0.0501	0.04943	0.0393	0.04311	0.09605	0.12415	0.16206	0.17758	0.05647	0.10768	759	842
44.693	0.05312	0.05172	0.04287	0.04465	0.1006	0.12082	0.1668	0.16172	0.0573	0.10885	748	797
44.721	0.05169	0.04683	0.04515	0.04186	0.10703	0.12114	0.15039	0.18262	0.05834	0.11641	743	847
44.75	0.05328	0.04836	0.04168	0.04226	0.10596	0.12288	0.1537	0.17105	0.0603	0.11198	778	836
44.778	0.05002	0.04668	0.04282	0.04196	0.09739	0.12383	0.1608	0.16452	0.06663	0.11055	804	844
44.807	0.05431	0.05027	0.04234	0.04296	0.09806	0.12937	0.1537	0.17478	0.06507	0.12057	804	876
44.835	0.05145	0.04981	0.04244	0.04435	0.09846	0.12573	0.1496	0.16489	0.06517	0.13932	742	852
44.863	0.0536	0.05111	0.04111	0.0443	0.10007	0.12241	0.15891	0.1828	0.08341	0.19167	745	849
44.892	0.05002	0.0479	0.04534	0.04136	0.10167	0.1156	0.16049	0.17609	0.12227	0.31797	758	815
44.92	0.05241	0.0505	0.04272	0.04505	0.10315	0.12003	0.16301	0.1759	0.21801	0.45859	778	835
44.949	0.05678	0.05157	0.04234	0.04221	0.09833	0.12257	0.15433	0.18448	0.3553	0.43529	772	844
44.977	0.05511	0.05065	0.04296	0.04321	0.09739	0.12795	0.15417	0.18597	0.44389	0.32578	800	851
45.006	0.05113	0.05057	0.04453	0.04525	0.09953	0.11322	0.16254	0.17683	0.36172	0.30924	729	882
45.034	0.05105	0.05034	0.04258	0.04335	0.09926	0.11433	0.1537	0.19418	0.26443	0.31745	761	923
45.063	0.0505	0.04629	0.04449	0.04569	0.1002	0.1118	0.15654	0.18373	0.26236	0.25156	738	899
45.091	0.05352	0.0479	0.04515	0.04037	0.10074	0.11956	0.15607	0.18392	0.23863	0.17292	750	795
45.119	0.05089	0.04981	0.04606	0.04256	0.10087	0.1194	0.15481	0.17515	0.15812	0.12435	781	873
45.148	0.05495	0.04744	0.04225	0.04385	0.09967	0.11085	0.15607	0.17739	0.09636	0.11315	769	777
45.176	0.05344	0.04882	0.04539	0.04301	0.09056	0.11797	0.15307	0.17403	0.07118	0.10964	759	898
45.205	0.05121	0.04912	0.04563	0.04385	0.0994	0.11845	0.1608	0.17646	0.06393	0.10391	781	886
45.233	0.05431	0.04958	0.04439	0.04286	0.09618	0.1137	0.1597	0.17814	0.05751	0.10182	745	876
45.262	0.0501	0.04843	0.0453	0.04385	0.09752	0.12019	0.17043	0.18075	0.06414	0.09023	782	851
45.29	0.05034	0.04492	0.0422	0.04316	0.09792	0.12557	0.1578	0.16844	0.05575	0.09336	741	862
45.319	0.05702	0.04828	0.04291	0.04555	0.09926	0.11512	0.16033	0.17422	0.05471	0.10078	753	853
45.347	0.05161	0.05134	0.04372	0.04271	0.09082	0.11797	0.16285	0.16844	0.04549	0.08789	823	864
45.376	0.05304	0.04889	0.04563	0.04271	0.09873	0.12399	0.15086	0.18896	0.05233	0.1013	788	862
45.404	0.05328	0.04966	0.04368	0.0451	0.09859	0.11291	0.16459	0.17832	0.04642	0.09049	765	914
45.432	0.0536	0.04798	0.04325	0.04126	0.09297	0.11797	0.16727	0.18056	0.0486	0.09167	729	941
45.461	0.05479	0.04996	0.04268	0.04042	0.09806	0.11671	0.16838	0.18262	0.0516	0.09049	788	929
45.489	0.05463	0.04714	0.04339	0.04465	0.09591	0.12257	0.16822	0.19213	0.05005	0.0931	762	885
45.518	0.05344	0.04989	0.04568	0.0451	0.10087	0.11401	0.18258	0.18317	0.05077	0.09375	768	913
45.546	0.05423	0.05126	0.0442	0.04311	0.09618	0.11338	0.18037	0.18989	0.05056	0.09518	755	917
45.575	0.05249	0.05348	0.04368	0.0454	0.09297	0.11607	0.18179	0.20575	0.0515	0.09674	780	831
45.603	0.05201	0.05416	0.04401	0.04365	0.09471	0.11956	0.19883	0.20798	0.04466	0.09948	762	964
45.632	0.0505	0.05134	0.04487	0.04699	0.09618	0.12288	0.20988	0.21097	0.04528	0.09323	778	985
45.66	0.05161	0.05027	0.04739	0.04729	0.09015	0.1137	0.23386	0.22347	0.04528	0.09987	789	948
45.688	0.05614	0.04943	0.04449	0.04749	0.09149	0.11449	0.24018	0.23652	0.04663	0.09948	763	960
45.717	0.05209	0.05126	0.04344	0.04863	0.09457	0.11481	0.23844	0.25406	0.04787	0.09609	785	937
45.745	0.05924	0.04882	0.04649	0.0443	0.0927	0.10752	0.24412	0.25648	0.04694	0.0875	786	976
45.774	0.05527	0.04889	0.04496	0.04619	0.10007	0.11702	0.24633	0.2714	0.04373	0.09896	789	976
45.802	0.04851	0.04882	0.04449	0.04923	0.09444	0.11512	0.24791	0.27569	0.04746	0.0957	764	987
45.831	0.05312	0.05241	0.04596	0.04629	0.10127	0.11639	0.24254	0.25648	0.04476	0.08607	862	1009
45.859	0.05511	0.0518	0.04396	0.04594	0.09618	0.11702	0.22945	0.25126	0.04435	0.08958	843	985
45.888	0.04899	0.05134	0.04749	0.04574	0.09498	0.10847	0.22534	0.25126	0.04808	0.09206	911	1047
45.916	0.04692	0.05057	0.04191	0.0448	0.09538	0.12478	0.22045	0.24137	0.0486	0.08529	908	1075
45.944	0.05312	0.05256	0.04434	0.04525	0.09993	0.11591	0.21098	0.23857	0.04829	0.08815	998	1104
45.973	0.05241	0.04729	0.04315	0.04564	0.08908	0.11702	0.20451	0.22141	0.04839	0.08932	947	1068
46.001	0.05288	0.05187	0.04472	0.0435	0.101	0.11971	0.20104	0.2188	0.04994	0.09036	1036	1161
46.03	0.05352	0.04866	0.04401	0.04375	0.10315	0.12146	0.19252	0.21918	0.04974	0.08529	1080	1208
46.058	0.05463	0.04836	0.04396	0.04555	0.10033	0.11465	0.19284	0.21209	0.04797	0.08776	1139	1362
46.087	0.05455	0.05011	0.04372	0.04191	0.09658	0.11987	0.18589	0.19978	0.04715	0.0901	1280	1653
46.115	0.0501	0.04721	0.04125	0.04111	0.09524	0.11037	0.1769	0.20593	0.04725	0.08828	1661	1978
46.144	0.05416	0.04568	0.04272	0.04116	0.099	0.1137	0.1668	0.18579	0.0459	0.08438	2005	2532
46.172	0.05336	0.05088	0.04072	0.04321	0.09417	0.11987	0.16617	0.18504	0.04362	0.08346	2628	3089
46.201	0.05853	0.04736	0.04268	0.04574	0.1002	0.10721	0.16601	0.1884	0.04373	0.08841	3123	3146
46.229	0.05511	0.05248	0.04563	0.0444	0.09859	0.11544	0.15891	0.18504	0.04124	0.08776	3329	2863
46.257	0.05225	0.04599	0.03944	0.04151	0.09109	0.11797	0.15654	0.17907	0.04414	0.09271	3171	2702
46.286	0.05145	0.05019	0.04244	0.04231	0.09538	0.11085	0.14818	0.17683	0.04528	0.08737	2962	2426
46.314	0.05463	0.04981	0.04506	0.0453	0.09015	0.11069	0.15102	0.17105	0.0458	0.08177	2630	2223
46.343	0.05503	0.04981	0.04749	0.04196	0.09658	0.11797	0.15086	0.16228	0.04549	0.08711	2400	1886
46.371	0.05113	0.05294	0.04344	0.04126	0.09766	0.11053	0.15465	0.16508	0.04259	0.08802	1966	1475
46.4	0.04612	0.0492	0.0392	0.03897	0.09993	0.10404	0.13824	0.16023	0.0458	0.08216	1609	1335
46.428	0.05463	0.04553	0.04187	0.04246	0.08935	0.10625	0.13824	0.15538	0.04176	0.0819	1364	1124
46.457	0.05296	0.04775	0.04268	0.04316	0.0919	0.11607	0.14187	0.17086	0.04279	0.08633	1206	1073
46.485	0.05209	0.0437	0.04311	0.04276	0.09337	0.10325	0.14565	0.16098	0.04569	0.08333	1052	997
46.513	0.05225	0.04843	0.04377	0.04271	0.09993	0.11417	0.14376	0.16676	0.04393	0.08477	1145	1033
46.542	0.05447	0.04897	0.04091	0.04196	0.09712	0.11275	0.14297	0.16434	0.04683	0.08229	972	963
46.57	0.05129	0.04927	0.04158	0.04082	0.0919	0.10705	0.13824	0.16937	0.04196	0.08398	940	959
46.599	0.05384	0.05073	0.04549	0.04211	0.09431	0.11021	0.14471	0.1718	0.04404	0.09089	1014	919
46.627	0.05503	0.05225	0.04111	0.04082	0.09109	0.11243	0.14155	0.15016	0.04435	0.08359	939	972
46.656	0.05058	0.04683	0.0423	0.04057	0.09591	0.11892	0.14534	0.15781	0.04673	0.09023	869	929
46.684	0.04819	0.04828	0.03987	0.04276	0.09712	0.10816	0.13603	0.15781	0.04352	0.08477	855	937
46.713	0.05137	0.04882	0.04182	0.04097	0.09672	0.11576	0.14676	0.15594	0.04611	0.0849	800	904
46.741	0.05241	0.04958	0.04287	0.04057	0.08814	0.11512	0.1436	0.16266	0.04466	0.0862	788	944
46.769	0.05169	0.04973	0.04458	0.04216	0.09457	0.10911	0.14092	0.16042	0.04352	0.08086	794	906
46.798	0.0536	0.0479	0.04087	0.04395	0.0931	0.11164	0.13571	0.15519	0.04404	0.08659	802	884
46.826	0.05233	0.04836	0.04439	0.04261	0.09926	0.11053	0.14534	0.15855	0.04062	0.08568	852	877
46.855	0.05209	0.04813	0.04406	0.04425	0.09725	0.11101	0.13792	0.1524	0.04124	0.0862	844	896
46.883	0.05082	0.04622	0.04234	0.04131	0.0939	0.10594	0.14581	0.16918	0.04601	0.08099	870	924
46.912	0.04986	0.04905	0.04306	0.04171	0.09779	0.10625	0.14834	0.15818	0.043	0.08398	815	911
46.94	0.05376	0.04859	0.04115	0.04062	0.09417	0.10657	0.14549	0.1593	0.04114	0.09206	795	873
46.969	0.05089	0.05034	0.04134	0.04246	0.0935	0.10752	0.1477	0.16172	0.04455	0.08711	834	836
46.997	0.0505	0.04561	0.04477	0.04131	0.09377	0.11132	0.14202	0.16135	0.0458	0.08477	773	885
47.026	0.05034	0.04874	0.04363	0.04156	0.10033	0.11813	0.13682	0.15799	0.04507	0.08971	782	813
47.054	0.05296	0.04782	0.0442	0.04271	0.08948	0.11861	0.14123	0.15762	0.04435	0.08307	822	856
47.082	0.05066	0.04584	0.04396	0.04296	0.08908	0.11417	0.14297	0.15799	0.04424	0.09258	793	849
47.111	0.05074	0.04851	0.04501	0.04216	0.09565	0.11845	0.15118	0.16228	0.0458	0.09102	739	842
47.139	0.05376	0.04736	0.04263	0.0442	0.09658	0.10847	0.15054	0.15743	0.04808	0.08685	772	834
47.168	0.0528	0.04714	0.04111	0.04316	0.09471	0.11037	0.14676	0.15389	0.05326	0.08919	786	883
47.196	0.05336	0.04523	0.04458	0.04171	0.08935	0.10784	0.14691	0.15035	0.05595	0.08672	876	880
47.225	0.05137	0.04927	0.04444	0.04221	0.1006	0.11148	0.14944	0.16191	0.04974	0.08906	773	889
47.253	0.05145	0.04683	0.04291	0.04102	0.09109	0.12019	0.14202	0.15781	0.05005	0.09049	731	849
47.282	0.05185	0.04836	0.04125	0.04102	0.08989	0.1053	0.13824	0.16807	0.05471	0.08555	746	821
47.31	0.05392	0.04675	0.04296	0.0439	0.09792	0.11528	0.14297	0.1593	0.04953	0.08932	787	838
47.338	0.05193	0.04645	0.04296	0.04385	0.09203	0.11227	0.13492	0.15296	0.04538	0.0862	729	824
47.367	0.05034	0.04629	0.04368	0.04191	0.09297	0.11892	0.14108	0.15575	0.04777	0.09297	744	836
47.395	0.05511	0.04637	0.04349	0.04191	0.08774	0.11766	0.12877	0.1593	0.04549	0.08268	794	833
47.424	0.04891	0.04905	0.04415	0.0436	0.09069	0.11275	0.1354	0.16247	0.04487	0.08971	767	851
47.452	0.05376	0.04759	0.04468	0.04131	0.08975	0.11243	0.1425	0.16004	0.04414	0.08906	777	802
47.481	0.05177	0.04958	0.04477	0.04271	0.09176	0.12304	0.14802	0.17553	0.04165	0.08828	792	859
47.509	0.05336	0.04828	0.04658	0.04246	0.09417	0.11671	0.14644	0.16452	0.043	0.08659	758	860
47.538	0.05121	0.05088	0.04511	0.04599	0.09632	0.11876	0.13887	0.17086	0.04093	0.08477	744	822
47.566	0.05161	0.0482	0.04577	0.04739	0.09511	0.1156	0.1406	0.16135	0.04196	0.08984	753	863
47.594	0.05097	0.05271	0.04315	0.0453	0.08989	0.11322	0.13382	0.16807	0.0431	0.0901	755	918
47.623	0.04787	0.05202	0.04406	0.04515	0.09283	0.11544	0.14628	0.1662	0.04621	0.08789	732	831
47.651	0.04899	0.04943	0.04711	0.04714	0.09203	0.10451	0.14218	0.16937	0.04238	0.09336	794	871
47.68	0.05296	0.04744	0.04515	0.0448	0.09082	0.11148	0.14597	0.16489	0.04642	0.09766	767	903
47.708	0.04922	0.04683	0.04811	0.04345	0.099	0.11734	0.15181	0.16863	0.04404	0.09909	802	851
47.737	0.05026	0.04568	0.04411	0.04515	0.09136	0.11101	0.13729	0.16378	0.04414	0.11497	810	875
47.765	0.05336	0.05157	0.04296	0.0438	0.09457	0.10293	0.14739	0.16004	0.04518	0.11302	730	869
47.794	0.05256	0.04744	0.04301	0.0448	0.09149	0.11512	0.14029	0.15706	0.04383	0.10612	753	921
47.822	0.05145	0.04561	0.0423	0.0434	0.09645	0.10594	0.14597	0.16079	0.04569	0.09505	764	845
47.85	0.05018	0.04645	0.04363	0.04331	0.0927	0.10641	0.14486	0.16713	0.04497	0.10052	768	848
47.879	0.04445	0.04798	0.04168	0.04032	0.10087	0.1023	0.14218	0.16415	0.0402	0.09909	821	845
47.907	0.04938	0.04668	0.04415	0.04156	0.0919	0.10562	0.13902	0.16266	0.0401	0.09583	781	834
47.936	0.04907	0.04882	0.04182	0.04176	0.09551	0.10958	0.14202	0.1524	0.04238	0.08867	764	835
47.964	0.04763	0.04561	0.04091	0.04296	0.09591	0.10831	0.13603	0.15631	0.04901	0.08815	810	835
47.993	0.04954	0.04691	0.03939	0.04171	0.09873	0.10372	0.14139	0.17068	0.05191	0.09076	750	879
48.021	0.05241	0.04683	0.04263	0.04072	0.09404	0.10911	0.14187	0.17142	0.04911	0.09036	727	874
48.05	0.04811	0.04943	0.04525	0.04246	0.09216	0.10942	0.14534	0.16489	0.04911	0.09089	768	871
48.078	0.05129	0.04683	0.04249	0.04176	0.09551	0.10974	0.13871	0.16116	0.04797	0.09102	775	846
48.107	0.04978	0.04668	0.03977	0.04241	0.09967	0.11227	0.14518	0.1412	0.04497	0.08216	753	854
48.135	0.05296	0.04584	0.04244	0.04141	0.09605	0.10784	0.14123	0.15202	0.04663	0.08411	754	862
48.163	0.05535	0.04897	0.04101	0.0437	0.09257	0.11053	0.13476	0.15352	0.0459	0.08646	831	818
48.192	0.05209	0.04538	0.04134	0.04241	0.09283	0.11259	0.13666	0.16004	0.04797	0.08542	776	852
48.22	0.05304	0.04805	0.04253	0.04415	0.08948	0.10499	0.13413	0.15258	0.04393	0.0763	768	868
48.249	0.05264	0.04851	0.04234	0.04261	0.09109	0.10784	0.14123	0.15706	0.04414	0.08034	795	874
48.277	0.04978	0.04958	0.04463	0.04017	0.10248	0.10879	0.13287	0.14979	0.04528	0.08594	799	863
48.306	0.04533	0.04782	0.04177	0.03932	0.08506	0.10277	0.13271	0.15035	0.04569	0.07917	787	833
48.334	0.04573	0.0466	0.04244	0.03858	0.09324	0.11116	0.13461	0.15464	0.04373	0.08138	784	767
48.363	0.04748	0.04675	0.04149	0.04261	0.08989	0.11116	0.13524	0.15986	0.04259	0.08398	757	833
48.391	0.05288	0.04752	0.04268	0.04191	0.09109	0.11053	0.13997	0.15482	0.04445	0.07878	807	823
48.419	0.05288	0.0482	0.04039	0.04331	0.09337	0.10372	0.13682	0.1565	0.04487	0.07852	846	839
48.448	0.05264	0.04866	0.04211	0.04276	0.08881	0.10546	0.13902	0.15221	0.04321	0.08451	852	839
48.476	0.0532	0.04675	0.04344	0.04052	0.09257	0.10831	0.12893	0.14997	0.04238	0.08164	819	895
48.505	0.0563	0.04416	0.03977	0.04146	0.09752	0.10784	0.13871	0.16844	0.04445	0.08099	777	812
48.533	0.05042	0.04828	0.04163	0.04121	0.08828	0.10926	0.13713	0.15109	0.04031	0.08164	821	837
48.562	0.05614	0.0466	0.04387	0.04092	0.08774	0.11386	0.13334	0.1565	0.04538	0.08294	795	833
48.59	0.05408	0.04775	0.04172	0.04077	0.0994	0.10863	0.1365	0.14736	0.05233	0.08607	762	863
48.619	0.05344	0.04981	0.04168	0.03942	0.09591	0.10562	0.14123	0.14717	0.04694	0.08281	795	868
48.647	0.05686	0.04905	0.04096	0.03927	0.09471	0.10847	0.13382	0.14307	0.04435	0.08229	810	890
48.675	0.05129	0.04729	0.04063	0.03823	0.09243	0.10135	0.14155	0.1593	0.04632	0.0763	861	832
48.704	0.05153	0.04629	0.04115	0.04216	0.09699	0.10261	0.13792	0.15184	0.04632	0.08008	792	871
48.732	0.05368	0.0492	0.04168	0.03892	0.09457	0.10736	0.12608	0.16172	0.03886	0.08034	833	814
48.761	0.05264	0.04782	0.04053	0.03977	0.09056	0.11132	0.14076	0.16098	0.04476	0.07878	844	825
48.789	0.05487	0.05057	0.04058	0.0445	0.09578	0.10198	0.1305	0.15165	0.04569	0.08867	856	845
48.818	0.05662	0.04805	0.04139	0.04281	0.09524	0.10435	0.13208	0.15967	0.0431	0.08607	846	876
48.846	0.0536	0.04759	0.04201	0.04206	0.0864	0.10451	0.13413	0.14848	0.04114	0.08594	782	899
48.875	0.0575	0.04958	0.03925	0.04072	0.08667	0.1015	0.14329	0.14979	0.04466	0.08359	845	851
48.903	0.05781	0.0492	0.04353	0.04191	0.08721	0.10182	0.13003	0.1606	0.04611	0.07826	845	844
48.932	0.0567	0.05187	0.04149	0.04291	0.09149	0.10641	0.1406	0.15165	0.04424	0.08737	903	804
48.96	0.05423	0.04561	0.04406	0.04475	0.09082	0.09723	0.13461	0.15408	0.04331	0.08125	907	849
48.988	0.05288	0.045	0.04149	0.04141	0.0939	0.10974	0.12672	0.15184	0.04414	0.07969	841	849
49.017	0.05392	0.04836	0.04149	0.04196	0.08627	0.10847	0.13224	0.15426	0.04746	0.08385	845	880
49.045	0.05153	0.04691	0.04501	0.04082	0.09176	0.10705	0.13666	0.15184	0.04259	0.0832	836	803
49.074	0.05249	0.05264	0.04268	0.04151	0.09484	0.10546	0.14123	0.15538	0.04373	0.07682	820	860
49.102	0.05384	0.04882	0.04268	0.04097	0.09243	0.10008	0.13776	0.16303	0.04165	0.08385	824	857
49.131	0.05296	0.05011	0.04134	0.04017	0.09029	0.1099	0.12798	0.14624	0.04165	0.08633	738	825
49.159	0.05225	0.04996	0.04196	0.04047	0.09149	0.10816	0.13098	0.15501	0.04704	0.07826	797	784
49.188	0.05702	0.05134	0.04053	0.04146	0.09163	0.0996	0.13555	0.1593	0.04362	0.08086	705	810
49.216	0.05233	0.04828	0.04258	0.04375	0.09176	0.10451	0.13177	0.14251	0.04165	0.08242	725	847
49.244	0.05145	0.05195	0.04344	0.03947	0.08466	0.09707	0.13508	0.15314	0.04072	0.08424	745	793
49.273	0.05384	0.05164	0.04311	0.04345	0.08654	0.11037	0.13808	0.14288	0.04476	0.07591	700	777
49.301	0.05765	0.04836	0.04153	0.04301	0.08841	0.10926	0.12829	0.14755	0.04487	0.08034	669	811
49.33	0.05742	0.04996	0.04287	0.04032	0.08386	0.11417	0.13997	0.15035	0.04393	0.07969	745	771
49.358	0.05368	0.05065	0.04063	0.04276	0.0852	0.10594	0.13508	0.16004	0.04228	0.08424	737	806
49.387	0.05177	0.05455	0.04415	0.0434	0.09618	0.11021	0.13555	0.15594	0.04072	0.07109	676	781
49.415	0.05551	0.05057	0.04177	0.04161	0.08948	0.10879	0.12766	0.15202	0.0401	0.07852	745	860
49.444	0.05288	0.05432	0.0403	0.04087	0.0923	0.10784	0.13098	0.1524	0.04207	0.07487	717	880
49.472	0.0528	0.05088	0.04263	0.04166	0.0927	0.10277	0.13902	0.15557	0.0429	0.0793	708	819
49.5	0.06131	0.05485	0.04358	0.04311	0.08667	0.11116	0.1335	0.14979	0.0431	0.07786	707	832
49.529	0.06203	0.05684	0.03906	0.04535	0.08975	0.10293	0.13729	0.16079	0.03927	0.07799	707	867
49.557	0.06799	0.05722	0.03906	0.04455	0.08426	0.10594	0.13902	0.15221	0.04103	0.07773	726	827
49.586	0.06712	0.05577	0.04482	0.04331	0.09444	0.10863	0.13492	0.16004	0.03792	0.07839	713	844
49.614	0.07078	0.06142	0.04382	0.04385	0.09457	0.10499	0.1354	0.1509	0.04217	0.07852	713	869
49.643	0.07626	0.06669	0.04049	0.04166	0.0939	0.11243	0.13476	0.1565	0.04383	0.07383	678	861
49.671	0.0765	0.06891	0.04087	0.04485	0.09645	0.10024	0.13966	0.14326	0.0373	0.07266	700	821
49.7	0.08095	0.07173	0.04072	0.04276	0.09685	0.1034	0.13145	0.15035	0.04383	0.08008	754	807
49.728	0.0862	0.07456	0.04482	0.04669	0.0939	0.1099	0.13082	0.14512	0.03782	0.07865	744	800
49.757	0.0971	0.0809	0.04239	0.044	0.0939	0.11211	0.13587	0.14568	0.03906	0.07409	695	847
49.785	0.10616	0.09099	0.04053	0.04246	0.09297	0.1061	0.12987	0.14736	0.04134	0.07604	681	826
49.813	0.11913	0.09221	0.04425	0.04296	0.09471	0.10863	0.13287	0.14419	0.04176	0.07904	675	762
49.842	0.15046	0.11727	0.0432	0.0446	0.09524	0.11829	0.13161	0.15202	0.04507	0.08034	710	777
49.87	0.19753	0.14416	0.04358	0.04355	0.11132	0.11148	0.12735	0.15893	0.03917	0.08073	716	773
49.899	0.25423	0.18235	0.04215	0.04047	0.10757	0.11085	0.13745	0.15146	0.0401	0.07852	705	813
49.927	0.32588	0.23972	0.04153	0.04271	0.10877	0.11496	0.12577	0.15146	0.04186	0.07578	712	793
49.956	0.35722	0.30596	0.04387	0.04629	0.11293	0.11892	0.13035	0.16508	0.04186	0.07891	666	787
49.984	0.36573	0.34576	0.04444	0.04052	0.1219	0.12526	0.13839	0.14587	0.04186	0.07721	691	757
50.013	0.33948	0.35027	0.04406	0.04111	0.12458	0.1289	0.13603	0.15109	0.03855	0.08034	697	801
50.041	0.30402	0.32865	0.04496	0.03957	0.13289	0.13238	0.12877	0.15837	0.03823	0.08086	700	835
50.069	0.28199	0.30932	0.04253	0.04082	0.13758	0.13064	0.1324	0.14848	0.0401	0.07943	677	783
50.098	0.23809	0.28105	0.03915	0.04097	0.13436	0.13175	0.13287	0.14512	0.04207	0.075	646	785
50.126	0.19682	0.24026	0.04401	0.04609	0.13182	0.13682	0.13776	0.14232	0.03699	0.07161	687	787
50.155	0.15062	0.20458	0.04025	0.044	0.13463	0.13777	0.12656	0.1412	0.04041	0.08164	704	788
50.183	0.12342	0.16539	0.0433	0.04326	0.12271	0.14125	0.12719	0.15911	0.03564	0.06771	688	788
50.212	0.10449	0.12124	0.04811	0.0441	0.12552	0.13872	0.13808	0.15258	0.04072	0.0776	667	816
50.24	0.08612	0.10344	0.04353	0.04316	0.1148	0.12668	0.13113	0.16508	0.04031	0.08411	690	808
50.269	0.07682	0.09358	0.04387	0.04505	0.11534	0.13555	0.13382	0.14867	0.04145	0.0763	678	824
50.297	0.06918	0.07792	0.0433	0.04316	0.11587	0.1384	0.1335	0.14326	0.04093	0.0763	677	825
50.325	0.06569	0.06684	0.0442	0.04639	0.11775	0.13872	0.13208	0.1509	0.04134	0.0694	668	823
50.354	0.06505	0.06539	0.04611	0.04535	0.12029	0.1327	0.13066	0.15296	0.03803	0.075	696	809
50.382	0.06163	0.06348	0.04372	0.04689	0.12123	0.13428	0.13792	0.14979	0.04031	0.07982	662	803
50.411	0.05638	0.06142	0.04601	0.04465	0.10676	0.13523	0.1436	0.1524	0.03906	0.07773	671	763
50.439	0.05686	0.05676	0.04658	0.04679	0.10301	0.13302	0.14565	0.13859	0.04051	0.07109	717	813
50.468	0.05901	0.05439	0.04544	0.04559	0.11373	0.14157	0.14187	0.15949	0.04476	0.07292	678	817
50.496	0.05559	0.05073	0.04658	0.04833	0.11078	0.14078	0.13019	0.14438	0.03906	0.07865	690	816
50.525	0.05352	0.05691	0.04296	0.04754	0.10797	0.13317	0.13461	0.1509	0.0402	0.07565	687	870
50.553	0.05439	0.05004	0.04525	0.04564	0.1073	0.1422	0.13035	0.15296	0.03979	0.07982	676	779
50.581	0.05431	0.05363	0.05168	0.04833	0.10784	0.13286	0.13808	0.15165	0.04217	0.07565	739	788
50.61	0.05026	0.04866	0.05244	0.0434	0.10516	0.13555	0.13571	0.14456	0.04259	0.07318	715	782
50.638	0.05471	0.04706	0.0472	0.04679	0.10516	0.12985	0.13098	0.14923	0.04	0.08112	631	726
50.667	0.05137	0.05073	0.05173	0.04898	0.10409	0.13777	0.14139	0.15389	0.04124	0.075	651	746
50.695	0.05089	0.05073	0.05759	0.05147	0.10757	0.13428	0.14187	0.15109	0.04217	0.07865	673	780
50.724	0.05217	0.04943	0.05744	0.05475	0.1152	0.13682	0.14502	0.16116	0.04093	0.07956	612	718
50.752	0.05042	0.04958	0.06078	0.05759	0.114	0.13302	0.1507	0.15221	0.03917	0.06979	633	795
50.781	0.04994	0.0495	0.06587	0.0549	0.10797	0.14252	0.14234	0.16191	0.04569	0.07383	664	763
50.809	0.05201	0.04668	0.06859	0.05784	0.11628	0.1365	0.14644	0.16284	0.04031	0.07943	678	774
50.838	0.05137	0.04859	0.07316	0.06013	0.11145	0.13365	0.1477	0.1634	0.04155	0.07669	662	776
50.866	0.05193	0.04614	0.07754	0.06451	0.12003	0.13634	0.15307	0.16415	0.0431	0.07331	631	793
50.894	0.0501	0.04515	0.08307	0.07272	0.12284	0.14299	0.16143	0.15949	0.04186	0.07148	709	760
50.923	0.0474	0.04759	0.09826	0.07765	0.11574	0.13634	0.16995	0.16359	0.04134	0.07409	705	763
50.951	0.04946	0.04675	0.10855	0.08855	0.12632	0.14173	0.16049	0.17403	0.03865	0.07331	683	739
50.98	0.04573	0.04767	0.12751	0.09866	0.12445	0.15788	0.18873	0.17795	0.03937	0.07305	681	743
51.008	0.05074	0.04622	0.15585	0.11468	0.13115	0.14996	0.2042	0.19418	0.03958	0.07448	689	805
51.037	0.0466	0.04645	0.19514	0.14614	0.13637	0.16263	0.23607	0.19903	0.03761	0.07448	711	800
51.065	0.04684	0.04843	0.24425	0.18825	0.13543	0.16168	0.25611	0.2175	0.03979	0.07122	701	805
51.094	0.0505	0.04828	0.29402	0.234	0.14749	0.16595	0.28925	0.23652	0.04238	0.07513	646	800
51.122	0.04899	0.04423	0.33079	0.28955	0.15432	0.19303	0.30803	0.26655	0.03575	0.07617	663	778
51.15	0.04414	0.04637	0.34889	0.32499	0.16557	0.1943	0.33202	0.28446	0.04031	0.06953	679	808
51.179	0.04962	0.04729	0.34837	0.34087	0.1779	0.20491	0.33944	0.32307	0.04455	0.06706	713	776
51.207	0.0493	0.0424	0.32713	0.32295	0.1937	0.22359	0.35963	0.34956	0.04031	0.07565	704	771
51.236	0.04922	0.04171	0.30574	0.29497	0.22786	0.24006	0.35821	0.35497	0.04186	0.07461	683	731
51.264	0.04763	0.04439	0.26792	0.27362	0.2296	0.25717	0.37005	0.35534	0.03886	0.07669	660	733
51.293	0.0493	0.04553	0.22682	0.23748	0.26376	0.27949	0.34654	0.36057	0.04114	0.07279	633	747
51.321	0.04437	0.04798	0.19347	0.19746	0.26818	0.28662	0.34196	0.35105	0.03823	0.07539	703	747
51.35	0.05018	0.04293	0.14942	0.16073	0.28895	0.31275	0.31119	0.34079	0.03917	0.07201	693	734
51.378	0.04461	0.0424	0.12341	0.13201	0.31011	0.32542	0.29604	0.34732	0.04082	0.07578	660	757
51.406	0.04803	0.04385	0.10217	0.10866	0.3286	0.3365	0.279	0.32046	0.03865	0.07995	692	756
51.435	0.04636	0.04645	0.08702	0.09323	0.33409	0.31544	0.27126	0.302	0.04165	0.07539	772	793
51.463	0.04437	0.04431	0.07664	0.07885	0.32739	0.32874	0.25832	0.29211	0.03937	0.07539	706	775
51.492	0.04636	0.04377	0.06787	0.06964	0.31989	0.29723	0.24554	0.28353	0.04031	0.07396	709	779
51.52	0.04819	0.04141	0.0592	0.06789	0.30502	0.30356	0.22787	0.26842	0.04424	0.07734	662	734
51.549	0.05137	0.0437	0.05616	0.05874	0.28038	0.28551	0.22377	0.24697	0.04383	0.08151	747	747
51.577	0.04724	0.04561	0.05282	0.05913	0.26175	0.26207	0.21903	0.25499	0.04362	0.07943	726	751
51.606	0.04724	0.04049	0.05187	0.05436	0.2367	0.24291	0.20656	0.23615	0.04186	0.07917	762	720
51.634	0.04588	0.04477	0.05258	0.05162	0.22492	0.22565	0.20941	0.23205	0.04165	0.08138	747	726
51.663	0.04994	0.04232	0.05063	0.04848	0.20255	0.20538	0.19962	0.23093	0.04321	0.08164	764	713
51.691	0.04692	0.045	0.04639	0.04783	0.19625	0.20491	0.20514	0.22701	0.04632	0.08346	704	827
51.719	0.04851	0.0453	0.04801	0.04798	0.17187	0.18591	0.20688	0.22981	0.04435	0.08294	738	780
51.748	0.0536	0.04339	0.04577	0.04584	0.15003	0.16849	0.2053	0.22738	0.04839	0.07826	766	710
51.776	0.04883	0.04248	0.04206	0.04609	0.14963	0.16073	0.19662	0.21675	0.0487	0.08021	758	772
51.805	0.05042	0.04484	0.04687	0.0445	0.13061	0.15519	0.1881	0.20668	0.04808	0.08594	705	757
51.833	0.04724	0.0411	0.04406	0.0441	0.1215	0.13682	0.1881	0.21414	0.04673	0.08776	719	779
51.862	0.05089	0.04385	0.04349	0.04629	0.114	0.12779	0.19662	0.20985	0.04756	0.09232	729	774
51.89	0.04946	0.04278	0.04439	0.04296	0.11078	0.12241	0.19631	0.20201	0.04922	0.09779	757	704
51.919	0.0497	0.04446	0.04411	0.04171	0.10797	0.12637	0.19946	0.21004	0.05088	0.10495	733	759
51.947	0.04795	0.04248	0.04311	0.04241	0.10167	0.11006	0.19583	0.20612	0.0515	0.11276	753	774
51.975	0.05074	0.04079	0.04206	0.04047	0.09257	0.11322	0.18305	0.20295	0.05129	0.13503	704	740
52.004	0.04795	0.04408	0.04682	0.04077	0.09082	0.11449	0.18211	0.19903	0.05585	0.1401	718	764
52.032	0.04819	0.04553	0.04106	0.04236	0.09096	0.10752	0.18226	0.19828	0.06776	0.15065	774	765
52.061	0.04962	0.04599	0.04377	0.04331	0.09417	0.11544	0.184	0.19884	0.09118	0.18555	746	737
52.089	0.04859	0.04179	0.04182	0.03897	0.08761	0.10784	0.17848	0.2119	0.14237	0.21406	673	779
52.118	0.04843	0.04316	0.0412	0.04047	0.08841	0.10673	0.17122	0.20108	0.18786	0.19466	714	752
52.146	0.04883	0.04393	0.04172	0.04022	0.0852	0.09945	0.18005	0.19772	0.17107	0.18281	715	766
52.175	0.04652	0.04018	0.04082	0.04321	0.08506	0.10071	0.18652	0.21526	0.13335	0.16094	714	798
52.203	0.04453	0.04179	0.0403	0.04092	0.08547	0.0958	0.19599	0.18802	0.12828	0.17734	682	769
52.231	0.05002	0.0427	0.03987	0.03922	0.08908	0.09438	0.1881	0.19698	0.13159	0.16836	694	714
52.26	0.04708	0.04018	0.03825	0.03848	0.09015	0.1023	0.18005	0.20463	0.13025	0.14245	764	737
52.288	0.04811	0.04179	0.03925	0.03873	0.08252	0.0996	0.17832	0.20201	0.10527	0.13438	723	746
52.317	0.04501	0.04278	0.04272	0.03833	0.08238	0.10214	0.17564	0.19362	0.0917	0.12891	709	746
52.345	0.04684	0.0437	0.04091	0.04316	0.08747	0.10071	0.18211	0.19455	0.07201	0.12708	708	775
52.374	0.04326	0.04408	0.03882	0.03987	0.08104	0.09454	0.18211	0.19735	0.07036	0.12747	720	765
52.402	0.04199	0.03942	0.04177	0.03773	0.08372	0.10309	0.18305	0.19642	0.06507	0.125	704	743
52.431	0.04732	0.04202	0.04272	0.04032	0.08212	0.10071	0.17201	0.18877	0.06953	0.12422	756	750
52.459	0.04684	0.04339	0.03901	0.03634	0.07904	0.0977	0.17816	0.18672	0.06559	0.12188	690	754
52.488	0.04215	0.04385	0.0401	0.04047	0.08346	0.09565	0.17611	0.1856	0.06528	0.12995	677	787
52.516	0.04366	0.04255	0.03849	0.04201	0.08788	0.1015	0.15843	0.19381	0.06839	0.13294	668	766
52.544	0.04787	0.04141	0.04144	0.04291	0.08466	0.08836	0.16853	0.17086	0.06476	0.13034	692	825
52.573	0.04485	0.04431	0.04049	0.03912	0.08453	0.08741	0.18384	0.18709	0.07222	0.15156	710	802
52.601	0.04143	0.04141	0.0401	0.03957	0.08171	0.09596	0.17469	0.18579	0.07927	0.17018	678	800
52.63	0.04517	0.04186	0.03858	0.03823	0.08292	0.09802	0.16948	0.1718	0.09502	0.22956	711	763
52.658	0.04239	0.04171	0.0422	0.03878	0.07609	0.09438	0.17248	0.1787	0.13335	0.31458	709	776
52.687	0.04652	0.04171	0.04277	0.04525	0.07729	0.09549	0.16159	0.1815	0.21303	0.38698	672	773
52.715	0.04549	0.04026	0.04372	0.04176	0.08185	0.09802	0.16443	0.17907	0.30981	0.30951	677	717
52.744	0.04374	0.04171	0.04387	0.04226	0.08158	0.09549	0.16585	0.17832	0.34763	0.21992	665	817
52.772	0.04843	0.04354	0.04387	0.0434	0.08011	0.09375	0.17406	0.17422	0.25945	0.21029	724	780
52.8	0.04819	0.0466	0.04549	0.04266	0.07622	0.09501	0.17627	0.17963	0.17863	0.23216	781	796
52.829	0.04326	0.0411	0.04601	0.04355	0.07314	0.09105	0.16396	0.17665	0.18744	0.2138	660	757
52.857	0.04485	0.04003	0.0483	0.04669	0.07421	0.09565	0.16554	0.1884	0.20133	0.1513	716	786
52.886	0.04732	0.04484	0.04777	0.04599	0.07569	0.0825	0.17074	0.18467	0.1663	0.11615	700	825
52.914	0.04398	0.04339	0.04739	0.05037	0.07662	0.09295	0.17216	0.18616	0.10268	0.10404	708	831
52.943	0.04366	0.04637	0.04315	0.04749	0.07676	0.09184	0.17279	0.18299	0.07543	0.0957	676	796
52.971	0.04247	0.04484	0.04496	0.04788	0.07515	0.10055	0.18147	0.19567	0.05927	0.08294	675	873
53	0.0427	0.04736	0.0442	0.04754	0.07837	0.10055	0.17485	0.1884	0.05212	0.09232	663	831
53.028	0.04453	0.04912	0.04325	0.04998	0.07823	0.09865	0.17421	0.20313	0.04942	0.08776	663	850
53.056	0.0439	0.04843	0.04201	0.04614	0.07502	0.09945	0.18573	0.21433	0.04476	0.08268	752	926
53.085	0.04072	0.04866	0.04044	0.04868	0.07595	0.10245	0.18747	0.21768	0.04124	0.08594	716	908
53.113	0.04429	0.05477	0.04077	0.05157	0.0777	0.10325	0.18021	0.21712	0.04228	0.08385	672	927
53.142	0.04573	0.04889	0.03891	0.05251	0.08011	0.0947	0.19205	0.21806	0.04155	0.08229	722	950
53.17	0.0439	0.04889	0.03801	0.05177	0.07435	0.0996	0.19678	0.22048	0.04217	0.07591	662	974
53.199	0.04199	0.05294	0.04053	0.05311	0.07408	0.10736	0.19931	0.23037	0.04352	0.0763	682	942
53.227	0.04636	0.04759	0.03891	0.05371	0.07569	0.10594	0.21619	0.24529	0.0373	0.08021	703	990
53.256	0.04414	0.04591	0.03844	0.05226	0.07408	0.10816	0.22377	0.26581	0.03741	0.08893	639	1068
53.284	0.04509	0.05187	0.03949	0.05212	0.0793	0.10752	0.23749	0.27644	0.04124	0.08177	729	975
53.312	0.03944	0.05141	0.03606	0.04948	0.07743	0.10768	0.26921	0.28987	0.03855	0.07513	688	951
53.341	0.04493	0.04706	0.03739	0.04853	0.07917	0.10372	0.2932	0.31748	0.04134	0.07682	684	993
53.369	0.04461	0.04637	0.04044	0.05167	0.08038	0.10277	0.30424	0.32531	0.04165	0.07357	703	985
53.398	0.04151	0.04637	0.03725	0.05207	0.07019	0.10863	0.32555	0.34658	0.03751	0.07591	706	970
53.426	0.0427	0.04186	0.03858	0.04943	0.07595	0.09818	0.33091	0.36169	0.03875	0.07227	724	947
53.455	0.04262	0.04568	0.03753	0.0455	0.07689	0.10103	0.35411	0.3712	0.04114	0.07174	728	995
53.483	0.04231	0.04507	0.03863	0.04495	0.07153	0.10499	0.34338	0.3768	0.03958	0.0724	776	1022
53.512	0.0435	0.04561	0.03696	0.04525	0.07073	0.10372	0.34669	0.37157	0.03906	0.0668	745	980
53.54	0.04127	0.04278	0.03882	0.04405	0.07877	0.0977	0.32665	0.36504	0.03948	0.0737	774	938
53.569	0.04294	0.04148	0.0382	0.04111	0.07971	0.09501	0.31797	0.35721	0.03699	0.07487	826	977
53.597	0.04183	0.04202	0.03796	0.04077	0.07073	0.09913	0.3175	0.33408	0.03917	0.06992	801	1057
53.625	0.04239	0.0411	0.03758	0.04241	0.07555	0.09042	0.28484	0.31748	0.03761	0.06836	870	1057
53.654	0.0427	0.04049	0.03934	0.04102	0.07234	0.09343	0.27095	0.30703	0.03792	0.06745	889	1134
53.682	0.04501	0.03995	0.0361	0.03962	0.07461	0.08915	0.2659	0.28278	0.0345	0.07122	1002	1160
53.711	0.04286	0.04278	0.03644	0.03952	0.07301	0.0985	0.25391	0.28148	0.03792	0.06602	1063	1219
53.739	0.04167	0.04163	0.03706	0.04002	0.0714	0.09089	0.22661	0.2576	0.03595	0.07227	1107	1202
53.768	0.0431	0.03675	0.03601	0.03763	0.07381	0.08203	0.21777	0.25592	0.0401	0.06536	1128	1347
53.796	0.04143	0.03774	0.03677	0.03892	0.07274	0.08852	0.20798	0.25947	0.03471	0.07396	1247	1469
53.825	0.04247	0.03858	0.0371	0.03549	0.07381	0.08393	0.20451	0.22608	0.03637	0.0638	1301	1628
53.853	0.04048	0.03942	0.03544	0.03718	0.07448	0.08963	0.19378	0.22645	0.03886	0.06784	1578	1806
53.881	0.04215	0.03629	0.03772	0.03609	0.06872	0.08646	0.19126	0.21936	0.0373	0.06445	1857	2359
53.91	0.04095	0.03965	0.03596	0.03599	0.07609	0.09406	0.178	0.20127	0.03492	0.06159	2459	3314
53.938	0.04159	0.04217	0.03725	0.03738	0.07676	0.08947	0.18384	0.19996	0.03886	0.05964	3578	4567
53.967	0.04064	0.03759	0.03644	0.03335	0.07796	0.08646	0.16948	0.19343	0.04	0.06445	5061	5914
53.995	0.04191	0.04011	0.03687	0.03559	0.07662	0.08377	0.1627	0.17609	0.04103	0.06406	6486	6143
54.024	0.04024	0.04018	0.0372	0.03718	0.07676	0.08694	0.1507	0.18373	0.0431	0.06563	6979	5323
54.052	0.04095	0.04118	0.03877	0.03738	0.07127	0.0863	0.15481	0.1815	0.03461	0.06016	6547	4523
54.081	0.04517	0.04003	0.03691	0.03982	0.07475	0.09026	0.14171	0.16564	0.0372	0.06797	5824	4241
54.109	0.04183	0.04293	0.0371	0.03564	0.0722	0.08899	0.1354	0.16434	0.03813	0.06641	5297	3967
54.137	0.04787	0.03995	0.03772	0.03519	0.07328	0.09216	0.12672	0.15557	0.03254	0.06393	4719	3481
54.166	0.04334	0.03843	0.0362	0.03703	0.07153	0.07918	0.13177	0.15314	0.03875	0.06641	4123	2583
54.194	0.04111	0.03881	0.03639	0.03659	0.07435	0.0882	0.12719	0.1509	0.03492	0.06393	3293	1809
54.223	0.04382	0.03782	0.03539	0.03683	0.07019	0.08456	0.12466	0.15053	0.03844	0.0707	2478	1482
54.251	0.04445	0.03919	0.03777	0.03594	0.07341	0.08836	0.12119	0.14661	0.03627	0.0638	1741	1231
54.28	0.0435	0.04041	0.03539	0.03519	0.07033	0.08646	0.11693	0.14065	0.04031	0.06549	1388	1097
54.308	0.04151	0.04049	0.03544	0.03673	0.07113	0.08551	0.12514	0.12945	0.03709	0.05781	1119	1005
54.337	0.04573	0.03957	0.03629	0.03678	0.06872	0.08614	0.12119	0.14307	0.04103	0.06224	1038	887
54.365	0.04334	0.04041	0.03548	0.03743	0.06765	0.08234	0.11062	0.13691	0.03927	0.06003	861	884
54.394	0.04278	0.03888	0.03801	0.03639	0.07314	0.08203	0.11977	0.13785	0.0373	0.06602	889	848
54.422	0.04016	0.04034	0.03582	0.03559	0.07395	0.08773	0.11835	0.13374	0.04041	0.06953	835	839
54.45	0.04636	0.03873	0.03629	0.03365	0.0706	0.08614	0.12656	0.14176	0.04155	0.06732	775	758
54.479	0.04421	0.03812	0.03663	0.03554	0.07019	0.08092	0.12608	0.1261	0.03772	0.06654	749	723
54.507	0.04294	0.03789	0.03539	0.03564	0.07448	0.08472	0.11488	0.12554	0.04259	0.06471	689	753
54.536	0.04628	0.03881	0.03648	0.03584	0.07033	0.08757	0.11535	0.13095	0.04093	0.06432	666	706
54.564	0.04437	0.04202	0.03749	0.03524	0.06979	0.092	0.12403	0.12703	0.03896	0.0668	657	715
54.593	0.04278	0.04018	0.03682	0.03544	0.06738	0.08551	0.12372	0.13449	0.03865	0.06745	694	717
54.621	0.04668	0.03873	0.0382	0.03529	0.07595	0.09058	0.12198	0.13244	0.04134	0.06953	685	734
54.65	0.04119	0.03835	0.0331	0.03788	0.06899	0.08187	0.11867	0.12498	0.03668	0.06862	664	724
54.678	0.04302	0.03965	0.03734	0.03673	0.06564	0.07791	0.11094	0.14009	0.03761	0.06758	666	738
54.706	0.04127	0.03835	0.03768	0.03683	0.07328	0.08044	0.11236	0.12852	0.03554	0.0694	625	746
54.735	0.0408	0.04034	0.03496	0.03519	0.06551	0.08899	0.11157	0.13822	0.03233	0.06745	652	708
54.763	0.04247	0.03659	0.03601	0.03624	0.07167	0.08314	0.11425	0.13468	0.03419	0.06159	622	826
54.792	0.04223	0.04018	0.0361	0.03624	0.07502	0.08567	0.11125	0.13393	0.03419	0.06445	659	777
54.82	0.0408	0.04148	0.03634	0.03688	0.07019	0.08694	0.10762	0.13244	0.03523	0.06393	666	759
54.849	0.03722	0.04263	0.0351	0.03629	0.06658	0.08345	0.11346	0.13412	0.03513	0.0625	644	689
54.877	0.04151	0.03988	0.03539	0.03798	0.06966	0.08884	0.11819	0.14065	0.03751	0.06901	598	753
54.906	0.03976	0.03652	0.03472	0.03519	0.06658	0.08757	0.10841	0.13897	0.03606	0.06771	652	755
54.934	0.0392	0.04225	0.03553	0.03678	0.07207	0.09169	0.10731	0.14102	0.03627	0.06302	632	737
54.962	0.03952	0.04003	0.03896	0.03484	0.06591	0.08915	0.11125	0.14195	0.03471	0.06185	625	694
54.991	0.03936	0.04057	0.03358	0.03574	0.07354	0.08155	0.11062	0.1371	0.03191	0.06758	680	733
55.019	0.04159	0.04049	0.03749	0.03843	0.06685	0.08409	0.10983	0.13841	0.03243	0.06341	624	688
55.048	0.03714	0.04049	0.03563	0.03897	0.07033	0.08773	0.11172	0.13636	0.03658	0.06159	620	722
55.076	0.04	0.03942	0.03315	0.03464	0.06403	0.08504	0.10778	0.13244	0.0344	0.0638	618	749
55.105	0.04	0.04034	0.03582	0.03469	0.07274	0.08599	0.11109	0.13169	0.03668	0.06081	630	702
55.133	0.04056	0.03957	0.03701	0.0338	0.06818	0.0787	0.10936	0.13244	0.0345	0.06654	649	673
55.162	0.03897	0.03942	0.03696	0.03524	0.07167	0.08535	0.11756	0.13803	0.03471	0.05846	660	660
55.19	0.04326	0.03713	0.03839	0.0339	0.07006	0.0863	0.10983	0.13803	0.04	0.06263	639	668
55.219	0.0439	0.04003	0.03696	0.03673	0.07113	0.07854	0.10888	0.13318	0.03844	0.06654	664	661
55.247	0.03753	0.03491	0.03677	0.03644	0.06885	0.0787	0.1103	0.12889	0.03699	0.05768	623	659
55.275	0.03618	0.04064	0.03639	0.03454	0.0651	0.08583	0.11188	0.13729	0.0372	0.06055	633	647
55.304	0.03881	0.0398	0.03472	0.03395	0.07033	0.07997	0.1103	0.12535	0.03906	0.06185	600	613
55.332	0.03793	0.03529	0.03553	0.03594	0.07019	0.07696	0.10857	0.13113	0.03482	0.06081	638	640
55.361	0.04048	0.0385	0.03525	0.03564	0.06805	0.07791	0.11346	0.1343	0.03741	0.0681	632	696
55.389	0.03618	0.03675	0.03467	0.03514	0.06711	0.08108	0.11535	0.13617	0.03419	0.06029	595	664
55.418	0.04048	0.03629	0.03525	0.03614	0.0647	0.07997	0.11409	0.13393	0.03544	0.05677	580	690
55.446	0.03801	0.0395	0.03367	0.0331	0.06859	0.08076	0.10715	0.12833	0.03274	0.05846	612	651
55.475	0.03881	0.03896	0.03548	0.0343	0.06725	0.07902	0.10904	0.12945	0.03378	0.05846	598	702
55.503	0.03865	0.03751	0.03253	0.03534	0.06443	0.08583	0.10241	0.13188	0.03243	0.06471	607	664
55.531	0.03865	0.03995	0.03463	0.03484	0.06055	0.08282	0.11662	0.13095	0.03533	0.06185	613	660
55.56	0.03714	0.03583	0.03448	0.03584	0.06685	0.07791	0.11125	0.12927	0.03347	0.0556	594	668
55.588	0.03857	0.034	0.03715	0.03454	0.06484	0.08013	0.10589	0.13897	0.0316	0.06302	626	661
55.617	0.03897	0.03636	0.0332	0.03524	0.0718	0.07807	0.10841	0.12666	0.03305	0.06276	611	652
55.645	0.03865	0.0398	0.03325	0.0336	0.06631	0.0806	0.11078	0.12181	0.03254	0.06029	555	681
55.674	0.03586	0.03575	0.03348	0.03644	0.06993	0.08124	0.11157	0.13001	0.03378	0.05703	571	664
55.702	0.03793	0.03911	0.03658	0.03265	0.07033	0.07838	0.11614	0.12927	0.03502	0.06393	597	717
55.731	0.03586	0.03843	0.03463	0.03539	0.07019	0.07791	0.10699	0.13468	0.03409	0.05742	598	664
55.759	0.04072	0.0356	0.03596	0.03509	0.06417	0.08029	0.11125	0.12628	0.03419	0.06146	627	622
55.787	0.0396	0.03804	0.03387	0.03499	0.06604	0.07949	0.10399	0.11957	0.03015	0.06563	575	644
55.816	0.04191	0.03613	0.0361	0.03902	0.06631	0.08155	0.1133	0.12386	0.0345	0.06302	586	683
55.844	0.04151	0.03575	0.0352	0.03509	0.06604	0.07791	0.12214	0.12143	0.03316	0.06029	604	672
55.873	0.03897	0.03782	0.03496	0.03449	0.06805	0.08868	0.11504	0.12871	0.03254	0.06328	608	630
55.901	0.04	0.03613	0.0341	0.0339	0.06725	0.08139	0.11567	0.13113	0.03399	0.05833	612	649
55.93	0.0396	0.03759	0.03572	0.03514	0.07073	0.08171	0.10904	0.12647	0.03264	0.06458	596	639
55.958	0.03968	0.03858	0.03577	0.0331	0.07274	0.08013	0.10999	0.11789	0.03482	0.06198	618	647
55.987	0.03857	0.03583	0.03301	0.0335	0.06671	0.07205	0.11393	0.12069	0.03409	0.06341	563	648
56.015	0.03817	0.03728	0.03496	0.0343	0.06524	0.0749	0.10873	0.12255	0.03482	0.06016	593	671
56.043	0.03992	0.03965	0.03444	0.03629	0.06725	0.08139	0.11646	0.12143	0.03616	0.06328	602	640
56.072	0.0396	0.03583	0.03491	0.0325	0.06175	0.07743	0.11362	0.13542	0.03057	0.06185	576	646
56.1	0.03944	0.03965	0.0361	0.03345	0.06711	0.08203	0.11157	0.12852	0.03316	0.06719	587	658
56.129	0.04183	0.03888	0.03868	0.0336	0.06872	0.0825	0.10652	0.1233	0.03243	0.06549	584	661
56.157	0.04135	0.03858	0.03629	0.03738	0.06778	0.08155	0.10668	0.13057	0.03678	0.05846	599	642
56.186	0.03571	0.03881	0.03991	0.03798	0.06591	0.07965	0.11646	0.12777	0.03471	0.0651	582	672
56.214	0.03793	0.03591	0.03444	0.03629	0.06939	0.07585	0.11441	0.11285	0.03533	0.06237	605	691
56.243	0.04024	0.03751	0.03591	0.03614	0.06417	0.08329	0.10999	0.11752	0.03254	0.06159	581	653
56.271	0.03833	0.03888	0.03553	0.03619	0.0718	0.08282	0.11141	0.12143	0.03523	0.05716	581	687
56.3	0.04215	0.03995	0.0361	0.03474	0.07461	0.08314	0.11283	0.13636	0.03502	0.06055	573	680
56.328	0.04215	0.03942	0.03672	0.03519	0.06551	0.08472	0.10999	0.13095	0.03336	0.06029	612	656
56.356	0.04223	0.03934	0.03472	0.03569	0.06644	0.07411	0.11094	0.1302	0.03347	0.06615	585	646
56.385	0.04334	0.04163	0.03253	0.03544	0.06216	0.08219	0.11157	0.12852	0.03005	0.06276	594	686
56.413	0.04604	0.044	0.03391	0.03644	0.07113	0.0787	0.10904	0.11546	0.03627	0.06784	606	668
56.442	0.04708	0.04629	0.03372	0.03678	0.06604	0.07712	0.09894	0.12274	0.03347	0.05807	598	677
56.47	0.05026	0.04393	0.03325	0.0341	0.0651	0.07158	0.1051	0.11807	0.0315	0.05638	610	646
56.499	0.04596	0.0466	0.03291	0.03554	0.06912	0.08092	0.11961	0.12013	0.0344	0.05977	573	660
56.527	0.04883	0.04561	0.03591	0.0344	0.06336	0.07775	0.10336	0.12647	0.03637	0.06185	627	644
56.556	0.04111	0.04591	0.03325	0.03305	0.06135	0.08171	0.09784	0.12162	0.03336	0.0694	583	667
56.584	0.04199	0.04507	0.03625	0.03345	0.06872	0.07569	0.10762	0.1177	0.03005	0.06888	588	666
56.612	0.04421	0.04194	0.03467	0.0327	0.07528	0.07949	0.10305	0.12889	0.03347	0.06706	574	621
56.641	0.04207	0.03843	0.03458	0.03494	0.06417	0.07458	0.11299	0.12423	0.03243	0.0651	629	685
56.669	0.03944	0.0398	0.03491	0.03509	0.07113	0.08234	0.10525	0.12777	0.03388	0.07174	619	603
56.698	0.03825	0.04263	0.03463	0.03519	0.07086	0.08203	0.11109	0.12535	0.03326	0.06706	557	626
56.726	0.0392	0.03972	0.03229	0.03559	0.06591	0.07474	0.10178	0.12292	0.03419	0.0638	616	633
56.755	0.0404	0.03812	0.03296	0.03678	0.06805	0.08029	0.1062	0.11807	0.02922	0.06875	567	694
56.783	0.03722	0.03782	0.03496	0.03594	0.07301	0.07759	0.10731	0.12666	0.03129	0.06107	622	649
56.812	0.0361	0.03942	0.0352	0.03295	0.0643	0.07933	0.10683	0.12013	0.03378	0.06497	636	591
56.84	0.03785	0.03751	0.03334	0.0328	0.06524	0.07854	0.10462	0.12833	0.02974	0.06523	555	638
56.868	0.03897	0.0372	0.03439	0.03365	0.071	0.08029	0.10888	0.12815	0.03316	0.06393	565	648
56.897	0.04072	0.03438	0.03472	0.03634	0.07475	0.07411	0.10762	0.12311	0.03357	0.06029	604	633
56.925	0.03825	0.03629	0.03525	0.0325	0.06926	0.07997	0.10494	0.12498	0.03388	0.06797	594	658
56.954	0.03738	0.03644	0.03525	0.0337	0.06778	0.07348	0.10604	0.12292	0.03544	0.06289	633	647
56.982	0.03817	0.03667	0.03334	0.03559	0.06872	0.08044	0.10699	0.12479	0.03295	0.06797	647	624
57.011	0.03793	0.03591	0.0332	0.03599	0.05934	0.08044	0.11094	0.10931	0.03336	0.07526	595	606
57.039	0.04127	0.03919	0.03387	0.03703	0.06778	0.08171	0.11614	0.12069	0.03191	0.07044	590	645
57.068	0.03722	0.03598	0.03477	0.03479	0.06001	0.07791	0.11551	0.1274	0.02943	0.07188	539	606
57.096	0.03865	0.03644	0.03153	0.03489	0.07113	0.07743	0.10573	0.11136	0.03637	0.07031	583	662
57.125	0.03857	0.03736	0.03253	0.0342	0.06484	0.07854	0.10305	0.12181	0.03098	0.07305	578	598
57.153	0.03928	0.03453	0.03391	0.0342	0.06551	0.08124	0.10099	0.12386	0.03119	0.06797	547	619
57.181	0.03698	0.03484	0.03296	0.0342	0.07261	0.08044	0.10888	0.12722	0.03419	0.06849	562	586
57.21	0.03571	0.03529	0.03186	0.03484	0.0643	0.07743	0.1032	0.12031	0.03316	0.06706	613	622
57.238	0.03801	0.03675	0.03301	0.0338	0.06551	0.07918	0.10873	0.12348	0.03523	0.07018	613	619
57.267	0.04103	0.03484	0.03525	0.03275	0.06993	0.08029	0.11172	0.12199	0.03274	0.06823	567	646
57.295	0.03443	0.03835	0.03363	0.03355	0.06618	0.07965	0.1103	0.11919	0.0315	0.06497	552	583
57.324	0.03563	0.0382	0.03329	0.0344	0.06778	0.08393	0.1051	0.12143	0.03336	0.06341	568	607
57.352	0.04008	0.03621	0.03339	0.03385	0.06738	0.07696	0.11251	0.13281	0.02953	0.06029	580	618
57.381	0.04127	0.03697	0.03167	0.03285	0.07086	0.07458	0.10652	0.12143	0.03077	0.05911	630	630
57.409	0.03944	0.03629	0.03677	0.03425	0.06765	0.08203	0.11472	0.12292	0.03336	0.06224	548	586
57.437	0.03674	0.03377	0.03272	0.03415	0.06296	0.08361	0.11267	0.12983	0.03388	0.06081	575	612
57.466	0.03825	0.034	0.03529	0.03489	0.06417	0.07696	0.10683	0.13039	0.0372	0.05938	590	594
57.494	0.03483	0.03407	0.03806	0.0343	0.05894	0.07886	0.1103	0.12815	0.03585	0.05755	570	585
57.523	0.03738	0.03316	0.03801	0.03629	0.06711	0.07823	0.10967	0.11658	0.03254	0.05807	578	593
57.551	0.04302	0.03591	0.03777	0.03494	0.0706	0.08424	0.11188	0.12069	0.0343	0.05964	590	628
57.58	0.04143	0.03445	0.03749	0.033	0.06283	0.07601	0.11504	0.12087	0.03409	0.05638	581	616
57.608	0.03698	0.03697	0.03458	0.03509	0.07194	0.07759	0.10857	0.12162	0.03388	0.05677	570	640
57.637	0.03586	0.03407	0.0361	0.03609	0.07046	0.08409	0.11283	0.12386	0.03658	0.05768	588	597
57.665	0.03666	0.03392	0.03863	0.03693	0.07515	0.08266	0.10936	0.11938	0.0344	0.05938	571	566
57.693	0.03753	0.034	0.0393	0.03783	0.06537	0.08282	0.11109	0.12031	0.0314	0.05495	549	594
57.722	0.03857	0.03522	0.03968	0.03982	0.07381	0.07981	0.11551	0.11677	0.03067	0.05781	573	640
57.75	0.04119	0.03659	0.03949	0.03992	0.07033	0.07933	0.10904	0.11752	0.02943	0.05521	565	688
57.779	0.03642	0.03835	0.04211	0.03863	0.06792	0.0787	0.11062	0.12983	0.03264	0.0569	586	628
57.807	0.03658	0.03743	0.04601	0.04121	0.06872	0.07617	0.10825	0.12703	0.03741	0.05326	578	673
57.836	0.03642	0.03476	0.04311	0.04196	0.07904	0.08092	0.11614	0.12013	0.03419	0.05938	593	636
57.864	0.03682	0.03743	0.04177	0.04107	0.06926	0.08709	0.1092	0.12181	0.03658	0.05508	591	594
57.893	0.03706	0.03499	0.04158	0.03883	0.07448	0.08409	0.10699	0.12666	0.0316	0.04909	547	605
57.921	0.03785	0.03506	0.04249	0.04027	0.07823	0.08899	0.11425	0.12311	0.03046	0.05612	529	591
57.949	0.03571	0.03598	0.04191	0.03838	0.07904	0.09644	0.11251	0.11882	0.03347	0.05716	575	646
57.978	0.03483	0.03675	0.03939	0.03763	0.07609	0.09992	0.10368	0.13076	0.0316	0.05495	562	598
58.006	0.03483	0.03621	0.03863	0.03564	0.07796	0.0996	0.11236	0.12945	0.03233	0.06133	583	638
58.035	0.0361	0.03377	0.03787	0.03484	0.08533	0.0996	0.11015	0.12199	0.0345	0.06602	563	622
58.063	0.03666	0.03621	0.03806	0.03813	0.08439	0.10277	0.10999	0.11696	0.03585	0.05768	532	609
58.092	0.0361	0.03659	0.03782	0.03315	0.08975	0.09596	0.11677	0.13151	0.03347	0.06081	520	629
58.12	0.04	0.03384	0.03534	0.03206	0.0919	0.10055	0.11662	0.11901	0.03689	0.05716	555	571
58.149	0.03626	0.03522	0.0361	0.03584	0.08828	0.1004	0.11535	0.12777	0.03388	0.05938	536	600
58.177	0.0361	0.0314	0.03529	0.03444	0.0935	0.1023	0.1163	0.11957	0.03243	0.05742	555	604
58.206	0.03674	0.0356	0.03501	0.03509	0.09015	0.09818	0.10794	0.12647	0.03077	0.05924	581	572
58.234	0.03928	0.03354	0.03453	0.03111	0.08868	0.10293	0.11188	0.12218	0.0343	0.05781	596	632
58.262	0.0369	0.03835	0.03634	0.03599	0.08734	0.10562	0.11362	0.11602	0.03233	0.0612	564	617
58.291	0.03738	0.03109	0.03458	0.03275	0.08466	0.08979	0.10952	0.11994	0.03129	0.05794	546	575
58.319	0.03563	0.03675	0.03005	0.0336	0.08868	0.08994	0.10652	0.1261	0.03305	0.05534	573	600
58.348	0.03698	0.03438	0.03458	0.03181	0.08319	0.09026	0.10699	0.12722	0.03513	0.05	549	588
58.376	0.03801	0.03461	0.03258	0.03196	0.08212	0.08994	0.11046	0.12703	0.02984	0.0543	568	627
58.405	0.0369	0.03629	0.03539	0.03529	0.0781	0.09042	0.11172	0.12311	0.03264	0.06159	561	612
58.433	0.03284	0.03468	0.03301	0.03315	0.07756	0.09074	0.10857	0.12367	0.03243	0.05977	554	578
58.462	0.0373	0.03506	0.03501	0.03469	0.08091	0.08884	0.10731	0.13841	0.03336	0.05846	564	608
58.49	0.03515	0.03262	0.03387	0.03554	0.07247	0.08741	0.11078	0.1261	0.03388	0.05742	588	576
58.518	0.03841	0.03697	0.03229	0.03479	0.06805	0.08345	0.10525	0.12591	0.03564	0.06029	605	605
58.547	0.03849	0.03514	0.03296	0.03186	0.07073	0.08361	0.10999	0.13542	0.03544	0.06055	560	565
58.575	0.03443	0.03468	0.03277	0.03415	0.0706	0.08139	0.12309	0.1302	0.03502	0.05313	590	599
58.604	0.03769	0.03384	0.03339	0.03136	0.06631	0.07728	0.11409	0.12292	0.0345	0.05586	571	586
58.632	0.03539	0.03591	0.03396	0.03116	0.06202	0.08155	0.11457	0.12871	0.03409	0.05742	549	590
58.661	0.03706	0.03499	0.03177	0.03564	0.07207	0.08092	0.10857	0.12722	0.04155	0.0569	546	632
58.689	0.03873	0.03636	0.03125	0.0332	0.06979	0.0787	0.10352	0.12404	0.03772	0.05443	533	636
58.718	0.03579	0.03529	0.03396	0.03001	0.06658	0.08488	0.11614	0.12218	0.03741	0.05729	575	618
58.746	0.0369	0.03598	0.03401	0.03221	0.06323	0.08171	0.10888	0.11621	0.03658	0.06016	550	590
58.774	0.03563	0.0382	0.03058	0.03255	0.06671	0.07664	0.09689	0.11621	0.03855	0.06198	520	583
58.803	0.03213	0.03522	0.03286	0.03186	0.06952	0.07221	0.10683	0.12945	0.03492	0.05898	583	586
58.831	0.03475	0.03468	0.03577	0.03016	0.06269	0.07142	0.10226	0.11938	0.04041	0.06211	579	647
58.86	0.03507	0.03728	0.03339	0.03459	0.05693	0.07696	0.10841	0.12722	0.03761	0.0625	584	645
58.888	0.0338	0.0356	0.03277	0.03141	0.06229	0.07569	0.10147	0.10819	0.04155	0.0681	553	645
58.917	0.03388	0.03262	0.03206	0.033	0.06336	0.07173	0.10541	0.11285	0.03958	0.06276	554	587
58.945	0.03555	0.03094	0.03387	0.03584	0.06323	0.06952	0.11062	0.11192	0.0429	0.06523	582	561
58.974	0.03555	0.03193	0.03482	0.03345	0.06912	0.07379	0.10699	0.11975	0.04228	0.06732	562	591
59.002	0.03594	0.03522	0.03668	0.03181	0.0635	0.07886	0.10447	0.12087	0.05119	0.07669	588	605
59.031	0.03594	0.03598	0.03453	0.03116	0.05894	0.07458	0.11094	0.11528	0.06818	0.09401	537	587
59.059	0.03658	0.03644	0.03467	0.03529	0.06068	0.07458	0.10904	0.12311	0.07647	0.09049	531	574
59.087	0.03658	0.03568	0.03568	0.0331	0.06859	0.07015	0.10273	0.1177	0.07523	0.0832	541	601
59.116	0.03825	0.03675	0.03477	0.03698	0.06109	0.07332	0.1032	0.11677	0.06238	0.08464	566	564
59.144	0.03483	0.03484	0.03839	0.03659	0.06216	0.07712	0.11898	0.12013	0.0602	0.08398	534	548
59.173	0.0361	0.03453	0.03972	0.0334	0.0639	0.07205	0.10888	0.12871	0.06279	0.08164	541	614
59.201	0.03372	0.03461	0.03944	0.03693	0.06109	0.06873	0.11441	0.11826	0.06663	0.08112	542	600
59.23	0.03396	0.03568	0.03953	0.03688	0.06644	0.07268	0.11204	0.11584	0.06269	0.07409	567	551
59.258	0.03658	0.03797	0.03987	0.03912	0.06068	0.07253	0.10573	0.12255	0.05803	0.07357	565	572
59.287	0.03698	0.03552	0.0402	0.03843	0.06309	0.07284	0.10683	0.12255	0.05202	0.07604	537	529
59.315	0.03666	0.03369	0.04039	0.04211	0.0635	0.0711	0.10431	0.12292	0.05046	0.07617	546	609
59.343	0.03475	0.03178	0.03858	0.04306	0.06283	0.07078	0.10589	0.11975	0.04911	0.07956	545	568
59.372	0.03579	0.03384	0.0401	0.04111	0.05707	0.07253	0.10336	0.12796	0.04756	0.08203	603	616
59.4	0.03602	0.0343	0.04101	0.04102	0.06122	0.07237	0.11046	0.12386	0.04746	0.08971	603	604
59.429	0.03364	0.03323	0.03987	0.03833	0.06162	0.07411	0.10699	0.11621	0.04942	0.09727	575	629
59.457	0.03427	0.034	0.03801	0.03738	0.06671	0.07522	0.11188	0.11714	0.06538	0.11237	532	602
59.486	0.03753	0.03308	0.03977	0.03718	0.06082	0.06888	0.11535	0.12125	0.08206	0.10339	575	566
59.514	0.03785	0.03392	0.03658	0.03708	0.06725	0.07284	0.10888	0.1205	0.08258	0.08672	498	601
59.543	0.03539	0.0343	0.03744	0.03514	0.05988	0.06952	0.11551	0.12311	0.07108	0.09115	551	542
59.571	0.03602	0.03338	0.03587	0.03868	0.05975	0.06952	0.11015	0.12423	0.07253	0.11654	565	584
59.599	0.0373	0.03422	0.0331	0.03534	0.06175	0.07221	0.1103	0.12013	0.08227	0.11185	552	593
59.628	0.0373	0.03461	0.03358	0.03574	0.0647	0.08298	0.11299	0.12218	0.09533	0.08932	494	601
59.656	0.0369	0.03476	0.03186	0.03509	0.05921	0.08076	0.10525	0.12628	0.09315	0.07891	569	560
59.685	0.03626	0.03369	0.03558	0.03345	0.06524	0.07094	0.10462	0.12684	0.06828	0.0737	558	584
59.713	0.03594	0.03728	0.03434	0.03504	0.06216	0.07363	0.10431	0.1274	0.05916	0.07734	535	568
59.742	0.03833	0.033	0.03301	0.03365	0.05666	0.0692	0.10241	0.11658	0.05502	0.07565	560	573
59.77	0.03857	0.03728	0.03644	0.0338	0.06269	0.07553	0.10589	0.12069	0.05709	0.06393	582	590
59.799	0.03523	0.03361	0.03401	0.03315	0.058	0.07363	0.10368	0.11397	0.05181	0.0599	554	614
59.827	0.0361	0.033	0.03367	0.03196	0.06122	0.07173	0.10478	0.1149	0.04342	0.05898	532	592
59.856	0.03777	0.03361	0.03291	0.03091	0.0647	0.07791	0.11078	0.10707	0.03989	0.05638	536	582
59.884	0.03396	0.03484	0.03467	0.0329	0.05774	0.07253	0.10478	0.11546	0.03595	0.05182	541	567
59.912	0.03467	0.03461	0.03382	0.0334	0.06189	0.07427	0.10368	0.11565	0.03513	0.05938	570	576
59.941	0.03443	0.03499	0.03253	0.03026	0.0639	0.07142	0.10052	0.12348	0.03761	0.05378	523	635
59.969	0.03706	0.03407	0.03448	0.0323	0.06028	0.07063	0.09863	0.1177	0.03616	0.05911	547	575
59.998	0.04095	0.03484	0.03201	0.0323	0.05921	0.06952	0.1081	0.12087	0.03792	0.05104	580	600
60.026	0.0365	0.03254	0.03206	0.03106	0.058	0.07237	0.10352	0.11453	0.04051	0.05313	533	569
60.055	0.03738	0.03499	0.03206	0.03519	0.05908	0.07221	0.10383	0.11229	0.04	0.05156	552	616
60.083	0.03531	0.03491	0.03091	0.0333	0.05666	0.07173	0.1133	0.11863	0.03419	0.0543	507	586
60.112	0.03372	0.03621	0.03248	0.03156	0.06068	0.07522	0.10746	0.11453	0.03958	0.05352	571	603
60.14	0.03284	0.03285	0.03453	0.0323	0.05479	0.06667	0.1032	0.11323	0.03772	0.05326	557	619
60.168	0.0369	0.03514	0.03001	0.03255	0.06256	0.07696	0.10415	0.10782	0.03865	0.05625	554	590
60.197	0.03746	0.03377	0.03229	0.03181	0.06189	0.07047	0.10305	0.11397	0.0373	0.05299	532	559
60.225	0.03658	0.03293	0.03415	0.0338	0.05948	0.06904	0.10557	0.11024	0.03471	0.05273	566	580
60.254	0.03491	0.03552	0.03153	0.03086	0.05908	0.07601	0.10668	0.12031	0.03108	0.05404	582	540
60.282	0.03483	0.03239	0.03182	0.03136	0.06283	0.07633	0.10746	0.11863	0.03212	0.05742	555	580
60.311	0.03579	0.03361	0.03329	0.02997	0.06202	0.07316	0.1081	0.11528	0.03015	0.05404	561	597
60.339	0.03515	0.03186	0.02977	0.03216	0.06216	0.07268	0.10462	0.12554	0.03212	0.04961	541	604
60.368	0.03396	0.03506	0.03177	0.03126	0.06042	0.0692	0.10241	0.11919	0.03285	0.05326	543	592
60.396	0.03435	0.03529	0.02977	0.03146	0.05881	0.07648	0.11157	0.12516	0.03254	0.05677	518	594
60.424	0.03642	0.03552	0.03115	0.03166	0.05961	0.07047	0.10257	0.12069	0.03233	0.05534	557	619
60.453	0.03682	0.03308	0.03172	0.03235	0.06189	0.06904	0.10794	0.10763	0.03202	0.0556	563	618
60.481	0.03626	0.03621	0.03467	0.0343	0.06042	0.06587	0.10573	0.11453	0.03347	0.05417	568	606
60.51	0.03714	0.033	0.03201	0.03335	0.06001	0.07791	0.10163	0.11621	0.03264	0.05508	548	604
60.538	0.0365	0.0314	0.03353	0.03021	0.058	0.07538	0.10084	0.12442	0.03274	0.05716	551	563
60.567	0.03746	0.03239	0.03177	0.03425	0.05412	0.07728	0.10636	0.12554	0.02932	0.05638	560	599
60.595	0.03642	0.03056	0.0321	0.03076	0.0576	0.07728	0.10668	0.12479	0.03336	0.05391	569	553
60.624	0.03523	0.03361	0.03163	0.03245	0.05841	0.07063	0.1051	0.12684	0.03492	0.05951	547	595
60.652	0.03523	0.03079	0.03339	0.0325	0.0576	0.06683	0.10873	0.12684	0.03482	0.05586	577	608
60.68	0.03905	0.03056	0.03306	0.03201	0.05961	0.07253	0.11236	0.11696	0.0372	0.05768	592	594
60.709	0.03682	0.03736	0.03125	0.02942	0.05586	0.0711	0.10163	0.12106	0.03523	0.05469	562	635
60.737	0.03547	0.03415	0.03129	0.03011	0.05747	0.0711	0.09989	0.11621	0.03658	0.05833	558	578
60.766	0.03523	0.03583	0.03225	0.03375	0.06242	0.07221	0.09894	0.1149	0.03336	0.0556	547	636
60.794	0.03936	0.0356	0.0322	0.03096	0.06376	0.07443	0.09942	0.12759	0.03741	0.05456	564	590
60.823	0.03491	0.03415	0.0302	0.03071	0.05693	0.07158	0.10683	0.12199	0.03305	0.05651	542	644
60.851	0.03857	0.03537	0.03091	0.03206	0.05894	0.07253	0.10589	0.11975	0.03523	0.05586	603	660
60.88	0.03714	0.03537	0.03044	0.0331	0.06269	0.07316	0.10904	0.1177	0.03419	0.05508	569	633
60.908	0.03475	0.034	0.03063	0.03026	0.05867	0.07205	0.09768	0.11565	0.03108	0.05755	592	602
60.937	0.03944	0.03552	0.03015	0.03106	0.06283	0.06651	0.0961	0.11901	0.03077	0.0556	617	643
60.965	0.03586	0.0343	0.03158	0.03096	0.06189	0.07031	0.10478	0.12087	0.03181	0.05729	599	625
60.993	0.03579	0.03934	0.02891	0.02967	0.0572	0.07063	0.09957	0.11733	0.03285	0.05482	607	701
61.022	0.03761	0.04072	0.03344	0.03166	0.0505	0.0692	0.0991	0.12535	0.03005	0.05117	617	735
61.05	0.03491	0.03667	0.03201	0.03141	0.05894	0.06857	0.09847	0.12199	0.03098	0.05794	682	815
61.079	0.03547	0.03766	0.03267	0.0333	0.06283	0.06524	0.10021	0.12069	0.02901	0.05677	847	877
61.107	0.0365	0.03835	0.03225	0.03206	0.06363	0.07189	0.09973	0.1136	0.03233	0.05156	796	869
61.136	0.03722	0.03713	0.03196	0.03176	0.05693	0.06461	0.09926	0.10893	0.0315	0.05638	792	787
61.164	0.03467	0.03782	0.03153	0.0338	0.06109	0.07379	0.09563	0.11248	0.02922	0.0556	799	783
61.193	0.04032	0.03629	0.03206	0.03176	0.058	0.07173	0.09579	0.11621	0.03108	0.05286	794	780
61.221	0.03388	0.04072	0.03253	0.02997	0.0639	0.07316	0.09863	0.1177	0.02963	0.04805	807	727
61.249	0.03714	0.03835	0.03034	0.02982	0.05854	0.07094	0.10147	0.11658	0.03305	0.05078	735	796
61.278	0.03722	0.0385	0.03229	0.03245	0.06149	0.07284	0.10462	0.10632	0.03388	0.05755	747	751
61.306	0.03984	0.03537	0.0332	0.02997	0.05613	0.06714	0.10005	0.11453	0.02849	0.05299	769	718
61.335	0.03793	0.03697	0.03377	0.0323	0.05224	0.07158	0.09437	0.12237	0.03285	0.05273	740	683
61.363	0.03666	0.03858	0.02991	0.03101	0.05532	0.07094	0.09594	0.1274	0.03409	0.05247	641	641
61.392	0.03594	0.04079	0.03077	0.03221	0.05332	0.0673	0.10604	0.11919	0.03513	0.05065	648	658
61.42	0.03714	0.03858	0.03148	0.03479	0.05814	0.07237	0.10131	0.1149	0.03171	0.05573	613	592
61.449	0.03706	0.03575	0.03334	0.0336	0.05814	0.07443	0.09752	0.10912	0.03419	0.05391	605	531
61.477	0.03531	0.04072	0.03263	0.03131	0.05291	0.07427	0.10715	0.11565	0.03709	0.05872	533	653
61.505	0.03976	0.03919	0.02977	0.03151	0.06537	0.07221	0.10525	0.11211	0.03368	0.05495	556	627
61.534	0.03777	0.03697	0.03067	0.03225	0.0576	0.07268	0.10447	0.1205	0.02974	0.06081	545	614
61.562	0.04016	0.04018	0.03125	0.03006	0.06229	0.07142	0.10778	0.11826	0.03378	0.05495	566	621
61.591	0.03658	0.03751	0.03206	0.03161	0.06122	0.0673	0.09815	0.12199	0.03492	0.06211	608	593
61.619	0.03865	0.03545	0.02991	0.03245	0.05921	0.06825	0.09673	0.1177	0.03191	0.05677	528	593
61.648	0.03968	0.03529	0.03177	0.03355	0.0635	0.06952	0.10762	0.11658	0.03046	0.05742	594	549
61.676	0.03865	0.03736	0.03406	0.0338	0.05975	0.07427	0.09168	0.11304	0.03305	0.05807	629	610
61.705	0.03809	0.03911	0.03458	0.03121	0.06109	0.07316	0.0961	0.11714	0.03119	0.0612	509	596
61.733	0.04342	0.03652	0.03358	0.02937	0.05867	0.07205	0.09926	0.1108	0.03212	0.0569	530	620
61.762	0.0435	0.03888	0.03229	0.02982	0.0568	0.07506	0.10178	0.10987	0.03513	0.05443	536	528
61.79	0.04167	0.03919	0.03363	0.03091	0.06175	0.07031	0.10115	0.11584	0.02891	0.04935	537	582
61.818	0.04215	0.03919	0.03272	0.03141	0.05666	0.06873	0.10194	0.11453	0.03077	0.0526	555	576
61.847	0.03873	0.03934	0.03034	0.03086	0.06403	0.07078	0.09437	0.10838	0.0315	0.05117	566	557
61.875	0.04	0.0398	0.03158	0.03235	0.05948	0.07316	0.08932	0.10856	0.03678	0.04831	581	565
61.904	0.04549	0.03751	0.03248	0.03166	0.05827	0.07031	0.09878	0.11061	0.03347	0.05417	558	626
61.932	0.04374	0.04079	0.03048	0.03066	0.06149	0.07158	0.09452	0.12815	0.03202	0.05534	571	594
61.961	0.04366	0.04163	0.03448	0.02957	0.0639	0.07158	0.09736	0.11434	0.03098	0.05221	592	582
61.989	0.0493	0.04576	0.03244	0.02982	0.05854	0.07633	0.10005	0.11677	0.02912	0.05221	544	598
62.018	0.0501	0.04194	0.03201	0.03076	0.06055	0.07427	0.09374	0.12181	0.03046	0.05221	565	537
62.046	0.054	0.0453	0.0361	0.03216	0.05827	0.07648	0.098	0.11434	0.03181	0.05456	560	546
62.074	0.05384	0.04637	0.03191	0.03026	0.06242	0.07348	0.09815	0.108	0.03388	0.04831	539	562
62.103	0.05734	0.04927	0.03306	0.03016	0.05948	0.0673	0.09405	0.11733	0.03015	0.05586	535	592
62.131	0.06306	0.05523	0.03434	0.03136	0.06309	0.07601	0.09894	0.10576	0.03347	0.04844	548	580
62.16	0.06258	0.05737	0.03339	0.03081	0.06296	0.07585	0.10731	0.11061	0.03005	0.0526	545	604
62.188	0.07125	0.06394	0.0341	0.03156	0.06537	0.06635	0.09942	0.11602	0.03616	0.05456	598	533
62.217	0.0734	0.06593	0.0322	0.03225	0.06551	0.06936	0.10352	0.10688	0.03212	0.04844	558	578
62.245	0.08135	0.0699	0.03225	0.0323	0.06738	0.07158	0.09784	0.11807	0.02818	0.04661	554	598
62.274	0.09614	0.07777	0.03348	0.03335	0.06309	0.07538	0.09784	0.11061	0.03627	0.04948	546	623
62.302	0.10879	0.08678	0.0331	0.03265	0.06618	0.07743	0.09957	0.11826	0.0314	0.0543	536	573
62.33	0.13233	0.09962	0.03301	0.03211	0.07368	0.06793	0.09784	0.11192	0.03036	0.05299	556	621
62.359	0.15881	0.11665	0.03525	0.0327	0.06685	0.07886	0.09957	0.11117	0.03129	0.05091	571	573
62.387	0.20573	0.15027	0.03382	0.03385	0.07542	0.08076	0.09263	0.11043	0.03222	0.04935	503	537
62.416	0.25527	0.18854	0.03244	0.03076	0.08305	0.08551	0.09673	0.11267	0.02756	0.05326	531	526
62.444	0.32493	0.24186	0.03401	0.02977	0.08587	0.08345	0.10636	0.10614	0.02922	0.04987	559	506
62.473	0.36533	0.30053	0.0332	0.0324	0.08078	0.08583	0.10163	0.11826	0.02704	0.05234	582	568
62.501	0.37622	0.34859	0.03515	0.03206	0.08908	0.08044	0.09752	0.11807	0.02953	0.05	537	595
62.53	0.35419	0.36371	0.03286	0.0325	0.09015	0.09295	0.10273	0.11378	0.03243	0.04896	595	605
62.558	0.32366	0.34736	0.03387	0.03201	0.09632	0.09279	0.10226	0.12031	0.03202	0.0526	583	614
62.587	0.28843	0.32636	0.03558	0.03365	0.10355	0.09913	0.10226	0.11863	0.03108	0.04909	605	557
62.615	0.27014	0.29396	0.03501	0.03335	0.0931	0.09517	0.10431	0.10744	0.03119	0.04766	571	586
62.643	0.25296	0.29152	0.03544	0.03444	0.09926	0.10261	0.09847	0.11621	0.02735	0.04792	567	561
62.672	0.21018	0.25668	0.03525	0.03295	0.10047	0.09644	0.0991	0.11752	0.03046	0.04896	507	579
62.7	0.17726	0.23163	0.03515	0.03544	0.10167	0.09691	0.0961	0.10838	0.03202	0.04635	562	526
62.729	0.14934	0.19878	0.0331	0.03295	0.10703	0.10198	0.09374	0.11061	0.03212	0.04818	579	551
62.757	0.11451	0.15966	0.03387	0.03449	0.10355	0.10024	0.09878	0.11397	0.03046	0.05169	571	614
62.786	0.10545	0.12827	0.03429	0.03529	0.099	0.10245	0.09421	0.11416	0.03191	0.05208	581	601
62.814	0.08406	0.1055	0.03582	0.03315	0.09792	0.11006	0.09642	0.1205	0.03036	0.05234	559	583
62.843	0.07157	0.09099	0.03463	0.03479	0.09297	0.0996	0.09468	0.11789	0.02839	0.0513	562	622
62.871	0.06441	0.07586	0.03396	0.0336	0.09069	0.10198	0.09736	0.11602	0.03513	0.05026	547	592
62.899	0.06266	0.07235	0.0351	0.03504	0.09752	0.09628	0.10194	0.11378	0.03171	0.05326	543	576
62.928	0.05742	0.06196	0.03787	0.0329	0.08721	0.09612	0.08979	0.1274	0.02777	0.05286	520	591
62.956	0.054	0.0602	0.03648	0.0324	0.08171	0.09628	0.10557	0.11117	0.02943	0.05065	580	599
62.985	0.05209	0.05523	0.03729	0.0335	0.09042	0.1034	0.10525	0.11919	0.02974	0.05234	539	587
63.013	0.04922	0.05371	0.03629	0.03499	0.08801	0.10594	0.10541	0.1233	0.03347	0.04674	546	566
63.042	0.04612	0.04905	0.03506	0.03514	0.07837	0.10245	0.10099	0.12125	0.03015	0.04766	574	582
63.07	0.04461	0.04683	0.03739	0.03405	0.07716	0.11338	0.09894	0.11789	0.02974	0.04857	549	589
63.099	0.04692	0.04759	0.03596	0.03609	0.08413	0.10736	0.10305	0.12516	0.02974	0.04987	620	574
63.127	0.04223	0.0427	0.03796	0.0339	0.07649	0.10736	0.10494	0.13412	0.02901	0.04844	599	547
63.155	0.04087	0.044	0.03725	0.03186	0.07636	0.1061	0.11125	0.1233	0.02932	0.04479	569	556
63.184	0.03913	0.03934	0.03791	0.0342	0.07542	0.10863	0.10541	0.12479	0.02901	0.05195	568	569
63.212	0.04215	0.04209	0.03753	0.03494	0.07314	0.10325	0.10636	0.12348	0.03088	0.05195	555	561
63.241	0.04056	0.03858	0.03844	0.0328	0.0718	0.108	0.10431	0.11901	0.02995	0.05234	580	590
63.269	0.03857	0.04179	0.04015	0.03579	0.08158	0.10372	0.10541	0.12292	0.02684	0.05	552	531
63.298	0.03889	0.03529	0.04001	0.03355	0.07703	0.10736	0.10383	0.12628	0.03254	0.04961	578	544
63.326	0.04231	0.03736	0.03977	0.03708	0.08038	0.10261	0.10399	0.12162	0.03222	0.05026	600	570
63.355	0.03658	0.03774	0.04344	0.03778	0.08453	0.10372	0.10431	0.12013	0.03077	0.04831	550	571
63.383	0.03809	0.03866	0.04387	0.03853	0.07421	0.10546	0.10178	0.12218	0.03046	0.04727	549	590
63.411	0.03706	0.03713	0.04358	0.04052	0.07555	0.1004	0.10573	0.11789	0.03254	0.05117	587	545
63.44	0.0369	0.03606	0.04701	0.04121	0.07917	0.10356	0.10163	0.11789	0.0314	0.04909	587	577
63.468	0.03849	0.03667	0.0503	0.03977	0.07555	0.09723	0.10825	0.1136	0.03015	0.04661	556	588
63.497	0.03714	0.03621	0.0502	0.0435	0.08198	0.09675	0.10857	0.11509	0.02881	0.0487	601	561
63.525	0.03435	0.03705	0.0513	0.04246	0.07917	0.09533	0.11141	0.12274	0.02984	0.04648	617	552
63.554	0.03563	0.03858	0.05449	0.04395	0.07904	0.10705	0.11993	0.12237	0.03181	0.04766	615	549
63.582	0.03889	0.03675	0.06035	0.04734	0.08225	0.10594	0.11867	0.12964	0.03098	0.05651	539	564
63.611	0.03698	0.03896	0.06411	0.05052	0.07984	0.10055	0.11788	0.12106	0.03098	0.05247	549	562
63.639	0.03499	0.03965	0.06973	0.05495	0.08734	0.10673	0.12687	0.12815	0.03005	0.04805	560	554
63.668	0.03427	0.03506	0.07426	0.05993	0.07984	0.10024	0.13287	0.12423	0.03357	0.05026	557	570
63.696	0.0334	0.03675	0.08369	0.06048	0.08238	0.10372	0.12025	0.12516	0.03399	0.05117	564	588
63.724	0.03491	0.03591	0.08974	0.06909	0.08547	0.0996	0.12908	0.13151	0.03326	0.05117	549	565
63.753	0.0365	0.03613	0.0975	0.07636	0.09042	0.10404	0.1425	0.14176	0.03316	0.04844	530	599
63.781	0.03706	0.03606	0.11693	0.08487	0.08828	0.10404	0.14265	0.15482	0.03181	0.05339	543	547
63.81	0.03539	0.03591	0.13446	0.09502	0.09069	0.10768	0.16585	0.15016	0.0316	0.04961	551	556
63.838	0.03268	0.0369	0.16123	0.1115	0.09645	0.12003	0.17327	0.16135	0.03202	0.04896	519	627
63.867	0.0361	0.03438	0.18466	0.13206	0.09471	0.1175	0.17926	0.16378	0.03254	0.04688	527	596
63.895	0.03523	0.03613	0.21186	0.16456	0.10569	0.12652	0.20688	0.18094	0.03057	0.05065	548	564
63.924	0.03634	0.03606	0.24692	0.19851	0.10676	0.12478	0.2225	0.18672	0.03015	0.05234	512	550
63.952	0.03586	0.03224	0.2793	0.22972	0.11159	0.13112	0.24507	0.20127	0.03378	0.05104	541	548
63.98	0.03507	0.03499	0.30426	0.26964	0.11775	0.13444	0.24602	0.22048	0.02932	0.05143	565	608
64.009	0.03626	0.03384	0.32884	0.30473	0.11507	0.14093	0.26716	0.23559	0.03243	0.04688	527	569
64.037	0.03507	0.03285	0.34451	0.32554	0.1278	0.15661	0.3033	0.26469	0.03057	0.05352	573	561
64.066	0.03292	0.03659	0.34565	0.33723	0.13825	0.15756	0.32397	0.28745	0.03243	0.04701	535	537
64.094	0.03372	0.03545	0.32927	0.34007	0.1495	0.17245	0.33218	0.29435	0.02684	0.05339	557	557
64.123	0.03427	0.0356	0.32089	0.32419	0.15941	0.1886	0.34843	0.3033	0.02922	0.04831	564	541
64.151	0.03419	0.03682	0.29664	0.30572	0.17857	0.19794	0.35159	0.3214	0.02995	0.05221	551	595
64.18	0.03372	0.034	0.26878	0.27352	0.19156	0.2076	0.33186	0.33539	0.02901	0.05195	538	601
64.208	0.03292	0.03675	0.23653	0.24674	0.20656	0.2342	0.3508	0.32792	0.0316	0.05	554	601
64.236	0.03547	0.034	0.21353	0.22245	0.22492	0.25384	0.33423	0.32718	0.0286	0.05299	541	611
64.265	0.03618	0.03591	0.18128	0.1994	0.24059	0.26081	0.31545	0.32382	0.03191	0.04935	578	589
64.293	0.03555	0.03415	0.14875	0.16814	0.26095	0.26857	0.29967	0.31468	0.02984	0.05313	563	574
64.322	0.03483	0.03254	0.13513	0.13783	0.26229	0.27411	0.29699	0.32046	0.03005	0.05156	558	575
64.35	0.03499	0.03285	0.11407	0.11249	0.26725	0.27696	0.2831	0.31468	0.03057	0.04961	528	539
64.379	0.03491	0.0327	0.0944	0.09721	0.27796	0.28709	0.27284	0.28297	0.02891	0.05299	544	540
64.407	0.03205	0.033	0.08059	0.08382	0.27448	0.28583	0.25485	0.28838	0.02901	0.05156	562	599
64.436	0.03642	0.03461	0.06883	0.0783	0.27783	0.27538	0.24207	0.2742	0.03108	0.05091	535	579
64.464	0.03467	0.03499	0.06149	0.06655	0.27328	0.29089	0.23465	0.26152	0.0315	0.05052	577	559
64.493	0.03777	0.03155	0.05525	0.06745	0.27636	0.2806	0.23134	0.24641	0.02995	0.04792	532	588
64.521	0.03459	0.03147	0.05468	0.0549	0.2493	0.24877	0.21398	0.24995	0.03067	0.05156	535	587
64.549	0.03491	0.03262	0.04777	0.05236	0.24675	0.24782	0.20167	0.23503	0.0316	0.05573	545	593
64.578	0.03451	0.03438	0.04696	0.05132	0.22612	0.22629	0.19962	0.23298	0.03015	0.05365	544	577
64.606	0.03539	0.0301	0.04606	0.04749	0.21996	0.21378	0.18179	0.22403	0.02901	0.05339	540	606
64.635	0.03316	0.03254	0.0443	0.0434	0.20013	0.20855	0.18274	0.21339	0.03098	0.05404	529	595
64.663	0.03483	0.03277	0.04082	0.04649	0.18232	0.19018	0.18826	0.20761	0.03026	0.04857	548	574
64.692	0.03682	0.03407	0.04177	0.04365	0.1791	0.17609	0.18542	0.19828	0.03409	0.04935	502	626
64.72	0.0361	0.0343	0.0402	0.04311	0.16825	0.15439	0.16948	0.19847	0.03098	0.05326	548	600
64.749	0.03372	0.03308	0.03963	0.04126	0.14789	0.15645	0.16759	0.20052	0.0315	0.05508	556	573
64.777	0.03459	0.03537	0.03763	0.04037	0.13932	0.13967	0.16412	0.18952	0.03378	0.06289	610	590
64.805	0.03316	0.03254	0.03672	0.04022	0.12405	0.12763	0.17611	0.18784	0.0314	0.05703	529	566
64.834	0.03682	0.03346	0.03677	0.03868	0.11186	0.12114	0.16995	0.19269	0.02943	0.05638	529	574
64.862	0.03817	0.03392	0.03796	0.03813	0.10636	0.12035	0.16459	0.18933	0.03005	0.05833	570	565
64.891	0.03475	0.03629	0.03396	0.04012	0.10248	0.10245	0.16285	0.19138	0.02932	0.0625	567	558
64.919	0.03221	0.03308	0.03448	0.03888	0.09618	0.0966	0.1679	0.18933	0.0315	0.06393	526	544
64.948	0.03388	0.03392	0.03587	0.03654	0.08962	0.10166	0.16159	0.18373	0.02984	0.06172	545	590
64.976	0.03801	0.03316	0.0341	0.03619	0.08413	0.09675	0.16033	0.17982	0.03108	0.06068	531	559
65.005	0.03722	0.03247	0.03639	0.03534	0.07488	0.08979	0.1627	0.17571	0.03689	0.06549	531	541
65.033	0.03443	0.03132	0.03453	0.03673	0.08091	0.0939	0.16364	0.17385	0.03316	0.06641	497	590
65.061	0.03746	0.033	0.03401	0.0342	0.07863	0.08836	0.14944	0.18094	0.03181	0.07057	507	556
65.09	0.03586	0.03109	0.03653	0.03479	0.07006	0.08076	0.15575	0.17963	0.03471	0.07148	555	536
65.118	0.03308	0.03575	0.03234	0.03569	0.07756	0.07759	0.14344	0.17105	0.03606	0.08268	569	580
65.147	0.03229	0.03254	0.03439	0.0328	0.06577	0.08203	0.15354	0.17459	0.03958	0.08815	536	569
65.175	0.03284	0.03316	0.03353	0.03464	0.06872	0.073	0.15228	0.17758	0.03533	0.09922	539	522
65.204	0.03157	0.03422	0.03382	0.03211	0.06524	0.07743	0.15607	0.15967	0.03533	0.09115	553	584
65.232	0.03427	0.03178	0.03487	0.0326	0.06296	0.07078	0.15875	0.16657	0.0373	0.0875	541	592
65.261	0.03539	0.03262	0.03406	0.03444	0.0639	0.07142	0.15102	0.15911	0.03616	0.08958	560	569
65.289	0.03435	0.03018	0.03472	0.03425	0.05921	0.07601	0.15528	0.15631	0.04176	0.08607	527	541
65.318	0.03459	0.03438	0.03191	0.03126	0.06189	0.07379	0.15654	0.17068	0.04031	0.09232	527	560
65.346	0.03356	0.03308	0.03129	0.03629	0.06403	0.07031	0.15717	0.16023	0.0402	0.09154	553	548
65.374	0.0334	0.03239	0.03225	0.03499	0.06229	0.07047	0.15212	0.16601	0.04424	0.08828	508	611
65.403	0.03181	0.03361	0.03363	0.0328	0.05827	0.07348	0.16459	0.1621	0.04373	0.08724	512	602
65.431	0.03308	0.03415	0.03267	0.03509	0.05948	0.06635	0.15039	0.16228	0.04777	0.08802	557	554
65.46	0.03308	0.03392	0.0342	0.03529	0.05948	0.0768	0.1496	0.16751	0.05471	0.10221	530	555
65.488	0.03404	0.03361	0.03296	0.03116	0.0572	0.06049	0.14313	0.16807	0.08403	0.15495	522	604
65.517	0.03388	0.03476	0.03344	0.0339	0.06818	0.07078	0.14471	0.16844	0.12911	0.18841	515	562
65.545	0.03435	0.03231	0.03191	0.03186	0.05948	0.07094	0.14313	0.16266	0.17615	0.18125	542	564
65.574	0.03205	0.03583	0.0311	0.03464	0.05626	0.06683	0.13792	0.15464	0.17418	0.15456	586	557
65.602	0.03579	0.03018	0.03563	0.03325	0.05425	0.07316	0.14534	0.15893	0.13936	0.13906	528	573
65.63	0.03372	0.03201	0.03182	0.03524	0.058	0.07411	0.15212	0.15725	0.11419	0.14297	526	590
65.659	0.03149	0.03285	0.03301	0.0328	0.05399	0.07648	0.14123	0.16807	0.10382	0.16081	540	547
65.687	0.03284	0.02995	0.03291	0.03509	0.0572	0.07063	0.13918	0.1565	0.1348	0.16992	579	577
65.716	0.03626	0.03598	0.03144	0.03245	0.05345	0.07221	0.14707	0.15743	0.13087	0.15026	612	579
65.744	0.03626	0.0301	0.0302	0.03534	0.05586	0.06762	0.13255	0.15893	0.11978	0.15026	633	638
65.773	0.03579	0.03155	0.03106	0.0328	0.05599	0.0711	0.15023	0.15538	0.11367	0.14766	602	609
65.801	0.03547	0.03415	0.03282	0.0331	0.05626	0.07506	0.14423	0.16116	0.09543	0.14805	604	565
65.83	0.03491	0.03659	0.0312	0.0327	0.06283	0.06714	0.14029	0.14587	0.10092	0.17435	600	571
65.858	0.0303	0.03652	0.03229	0.03315	0.06068	0.06857	0.13902	0.15669	0.11854	0.2237	640	610
65.886	0.03292	0.03102	0.03201	0.03265	0.05184	0.07031	0.13918	0.15706	0.1633	0.33919	597	649
65.915	0.03221	0.03552	0.03244	0.03499	0.05827	0.06857	0.13745	0.1524	0.25935	0.39219	640	615
65.943	0.03157	0.03338	0.03325	0.03425	0.05733	0.06603	0.13745	0.14773	0.34401	0.3099	621	646
65.972	0.03634	0.03407	0.02939	0.0332	0.05814	0.06619	0.14092	0.15389	0.35012	0.21706	573	605
66	0.03539	0.0372	0.03086	0.03489	0.05291	0.06778	0.13634	0.15426	0.23003	0.18177	596	619
66.029	0.03547	0.03568	0.0322	0.03499	0.05733	0.06746	0.12861	0.15109	0.16682	0.18776	601	662
66.057	0.03459	0.03293	0.02991	0.03524	0.05733	0.07569	0.13776	0.1468	0.1433	0.21901	627	655
66.086	0.03213	0.03491	0.03453	0.03579	0.05318	0.07601	0.13161	0.14848	0.16972	0.21745	564	617
66.114	0.03388	0.03881	0.03325	0.03654	0.05961	0.07221	0.12198	0.15053	0.1977	0.16367	610	672
66.142	0.033	0.03789	0.03196	0.03454	0.05867	0.06112	0.12672	0.15594	0.16827	0.11302	640	695
66.171	0.03332	0.03636	0.03182	0.0344	0.05948	0.06508	0.13571	0.14717	0.11273	0.09792	639	688
66.199	0.03245	0.03491	0.03053	0.03688	0.0568	0.07205	0.13571	0.14643	0.06911	0.0832	643	641
66.228	0.03348	0.03682	0.02982	0.03738	0.05131	0.06999	0.1253	0.14792	0.05357	0.07214	632	683
66.256	0.03245	0.03438	0.02905	0.03584	0.05184	0.07601	0.1223	0.1468	0.04818	0.06641	624	641
66.285	0.03547	0.033	0.02948	0.03614	0.05372	0.07648	0.1234	0.14941	0.04538	0.06406	649	719
66.313	0.0334	0.0372	0.0302	0.03564	0.0564	0.07363	0.12135	0.15464	0.04145	0.06328	549	682
66.342	0.03245	0.03835	0.02953	0.03912	0.05519	0.0616	0.13145	0.15799	0.03782	0.06198	570	686
66.37	0.03189	0.03682	0.03053	0.03972	0.05318	0.07268	0.1253	0.1565	0.03844	0.06185	612	750
66.399	0.03324	0.03484	0.03029	0.03673	0.05358	0.07379	0.12577	0.1468	0.0315	0.05964	642	745
66.427	0.03412	0.03835	0.03101	0.03932	0.05854	0.07585	0.13303	0.15258	0.03502	0.06888	567	759
66.455	0.03284	0.03598	0.02948	0.03853	0.05666	0.07078	0.13271	0.15296	0.03326	0.05977	591	772
66.484	0.03499	0.0372	0.03048	0.04052	0.05827	0.07775	0.14092	0.15072	0.03222	0.05677	508	775
66.512	0.03284	0.03377	0.02853	0.03828	0.05894	0.07237	0.13177	0.15296	0.03554	0.06016	572	708
66.541	0.0307	0.03697	0.02934	0.03912	0.05626	0.07775	0.13398	0.15799	0.02932	0.06224	607	760
66.569	0.03268	0.03728	0.03153	0.03798	0.04997	0.08504	0.13697	0.16284	0.0316	0.05938	618	746
66.598	0.03332	0.03789	0.03339	0.03803	0.05104	0.0768	0.13666	0.15221	0.0316	0.05859	592	750
66.626	0.03586	0.0372	0.03239	0.03823	0.06109	0.08345	0.15086	0.1606	0.03222	0.05677	565	757
66.655	0.03221	0.0398	0.03115	0.03783	0.05345	0.08219	0.14644	0.16937	0.03067	0.05638	566	710
66.683	0.02847	0.03759	0.02944	0.03813	0.05372	0.07981	0.14628	0.18243	0.03212	0.05664	594	783
66.711	0.03499	0.03552	0.03186	0.03992	0.05184	0.0711	0.15765	0.19157	0.02912	0.05651	590	766
66.74	0.03078	0.03804	0.03129	0.03917	0.05934	0.07506	0.16822	0.19791	0.02974	0.05716	599	736
66.768	0.03419	0.03613	0.03001	0.03957	0.05881	0.07949	0.16948	0.18299	0.03108	0.05911	594	740
66.797	0.03141	0.03407	0.02944	0.03897	0.05532	0.07696	0.18479	0.19716	0.03316	0.05534	636	740
66.825	0.03714	0.03965	0.03091	0.03713	0.05961	0.07268	0.1922	0.20724	0.02818	0.06107	582	734
66.854	0.03467	0.03873	0.03106	0.03763	0.05332	0.0863	0.19315	0.22421	0.0315	0.05794	575	741
66.882	0.03324	0.03927	0.02958	0.04131	0.05787	0.08171	0.20656	0.22888	0.0287	0.05521	604	752
66.911	0.03356	0.03942	0.03015	0.03907	0.05117	0.0844	0.2214	0.24212	0.03274	0.05391	595	720
66.939	0.03491	0.03988	0.03167	0.04022	0.04916	0.09184	0.2214	0.25275	0.03026	0.05898	616	781
66.967	0.03316	0.04248	0.02967	0.03808	0.05492	0.0863	0.24065	0.27252	0.02953	0.05534	610	772
66.996	0.0326	0.03919	0.03229	0.04276	0.05385	0.08789	0.2457	0.28801	0.0286	0.05456	626	814
67.024	0.03085	0.04064	0.02996	0.03783	0.05479	0.08694	0.2588	0.29864	0.03036	0.05273	613	797
67.053	0.03324	0.03995	0.0302	0.04107	0.0505	0.08409	0.26795	0.29416	0.02932	0.05495	606	846
67.081	0.02918	0.04339	0.02958	0.03937	0.05841	0.07775	0.27379	0.30517	0.02932	0.0543	593	808
67.11	0.03181	0.03644	0.03106	0.04092	0.05318	0.08203	0.27363	0.30386	0.03015	0.04714	604	800
67.138	0.03038	0.03736	0.0301	0.03848	0.05626	0.07997	0.28515	0.30256	0.02487	0.0487	677	786
67.167	0.03372	0.03904	0.02944	0.03927	0.05707	0.07712	0.26227	0.30293	0.02963	0.0526	660	773
67.195	0.03388	0.03782	0.02972	0.03688	0.05747	0.07411	0.25943	0.28017	0.02839	0.0526	682	829
67.224	0.033	0.03629	0.03077	0.03803	0.05573	0.07712	0.23844	0.2826	0.0257	0.04935	689	873
67.252	0.03404	0.03904	0.03434	0.03464	0.05653	0.07775	0.23197	0.27383	0.02891	0.0526	759	856
67.28	0.03316	0.03774	0.03148	0.03454	0.05251	0.07728	0.22203	0.26637	0.02559	0.04805	797	806
67.309	0.03078	0.03537	0.02934	0.0342	0.05546	0.07759	0.21098	0.24548	0.02922	0.05469	942	883
67.337	0.03189	0.03843	0.02948	0.03469	0.04903	0.06936	0.19489	0.23242	0.03036	0.05352	1059	989
67.366	0.03149	0.03591	0.03096	0.03609	0.05666	0.06778	0.18258	0.21992	0.0286	0.04935	1264	1024
67.394	0.03054	0.03552	0.0292	0.0339	0.05278	0.06873	0.18021	0.22458	0.03036	0.0457	1255	1092
67.423	0.03276	0.03911	0.03186	0.03211	0.05131	0.0654	0.17374	0.19959	0.03057	0.04896	1326	1114
67.451	0.03173	0.03453	0.03082	0.03529	0.05265	0.06999	0.16585	0.18635	0.03108	0.04688	1311	1225
67.48	0.03229	0.03293	0.02901	0.03001	0.05077	0.07189	0.16001	0.20034	0.02839	0.04857	1365	1191
67.508	0.03332	0.03407	0.02896	0.03091	0.05452	0.06714	0.16033	0.19157	0.02808	0.04674	1410	1249
67.536	0.02974	0.03407	0.03167	0.0324	0.0572	0.06128	0.1537	0.17273	0.03057	0.04818	1419	1404
67.565	0.03276	0.03254	0.03139	0.03176	0.05305	0.06746	0.1608	0.17497	0.02663	0.04674	1506	1426
67.593	0.0338	0.0301	0.03158	0.03126	0.05265	0.06667	0.15859	0.1759	0.02984	0.04909	1644	1662
67.622	0.03205	0.0314	0.03082	0.03016	0.05251	0.06651	0.1406	0.17198	0.02777	0.05117	1778	1996
67.65	0.03205	0.03262	0.02944	0.03171	0.05626	0.05764	0.13666	0.16359	0.03129	0.04479	2114	2399
67.679	0.03173	0.03048	0.02824	0.03026	0.06256	0.0692	0.13682	0.17366	0.03243	0.0513	2654	3111
67.707	0.03396	0.03209	0.0301	0.03166	0.05265	0.06318	0.13113	0.16564	0.02621	0.0457	3412	4084
67.736	0.03388	0.03109	0.03172	0.03001	0.05412	0.06445	0.12277	0.1537	0.02849	0.04674	4460	4628
67.764	0.03229	0.02934	0.03129	0.02972	0.05653	0.06698	0.12277	0.14382	0.03119	0.05013	5124	4385
67.792	0.03014	0.03147	0.03125	0.02912	0.05291	0.07253	0.12182	0.13785	0.02943	0.05169	4800	3732
67.821	0.03133	0.03063	0.02953	0.02967	0.05358	0.06556	0.11646	0.13505	0.03046	0.05078	4160	3126
67.849	0.03149	0.03239	0.03072	0.02753	0.05385	0.06413	0.10589	0.13132	0.02787	0.05013	3456	2899
67.878	0.033	0.03102	0.02963	0.02972	0.05466	0.07316	0.11378	0.12647	0.0257	0.0474	3049	2839
67.906	0.03221	0.03063	0.02963	0.02802	0.05372	0.06746	0.10715	0.12516	0.02953	0.04232	3257	2837
67.935	0.03205	0.03102	0.0291	0.03046	0.05546	0.06112	0.1092	0.12479	0.02881	0.04557	3048	2455
67.963	0.03173	0.03285	0.03153	0.02977	0.0568	0.06017	0.10462	0.11826	0.0287	0.04948	2691	1982
67.992	0.03364	0.03186	0.02891	0.02992	0.05425	0.06334	0.10652	0.11099	0.0315	0.04661	2176	1524
68.02	0.0307	0.03079	0.03005	0.02897	0.05573	0.06825	0.1051	0.11285	0.03274	0.04323	1597	1202
68.049	0.03268	0.03277	0.03244	0.03121	0.05532	0.0635	0.10399	0.1177	0.03067	0.04596	1210	963
68.077	0.03364	0.03079	0.0292	0.02897	0.05144	0.06302	0.1081	0.11061	0.02684	0.04648	1058	876
68.105	0.03014	0.02941	0.02958	0.02802	0.05559	0.06619	0.09894	0.11005	0.0286	0.04818	858	778
68.134	0.03165	0.03239	0.02963	0.03011	0.05318	0.06413	0.10273	0.11472	0.02715	0.04674	838	757
68.162	0.03404	0.03193	0.02915	0.03161	0.05532	0.06683	0.09405	0.11323	0.02849	0.04805	766	695
68.191	0.03396	0.03193	0.02839	0.03091	0.05211	0.06857	0.0931	0.11752	0.02777	0.04779	661	683
68.219	0.02982	0.03163	0.03101	0.02922	0.05265	0.06635	0.098	0.10726	0.03067	0.04661	662	624
68.248	0.02903	0.0327	0.03158	0.03146	0.05707	0.06002	0.09689	0.1108	0.02673	0.04792	662	641
68.276	0.03117	0.03033	0.03167	0.03066	0.05064	0.06651	0.09437	0.11696	0.02518	0.04609	602	652
68.305	0.0299	0.03224	0.02977	0.03016	0.0564	0.06477	0.09231	0.10931	0.03108	0.0474	645	616
68.333	0.03491	0.02926	0.02972	0.03066	0.05037	0.05796	0.09484	0.10614	0.02849	0.04609	601	596
68.361	0.03499	0.03293	0.0301	0.03211	0.05117	0.0654	0.09468	0.10949	0.02746	0.04232	596	608
68.39	0.03038	0.03285	0.03096	0.03101	0.05599	0.06081	0.09705	0.11136	0.02818	0.05234	589	593
68.418	0.03189	0.03239	0.03015	0.03046	0.05466	0.06049	0.08805	0.10819	0.02746	0.04414	565	581
68.447	0.03173	0.02956	0.02963	0.0325	0.05867	0.06207	0.09389	0.11341	0.02549	0.04518	593	599
68.475	0.03364	0.03094	0.03163	0.03106	0.05385	0.06366	0.10052	0.10278	0.02621	0.04661	515	595
68.504	0.0334	0.02941	0.03029	0.0328	0.05184	0.0654	0.09894	0.10949	0.02798	0.04531	578	620
68.532	0.03467	0.03209	0.03158	0.03096	0.05238	0.06192	0.09547	0.11229	0.02632	0.04909	595	553
68.561	0.03221	0.02934	0.03115	0.03161	0.05666	0.0616	0.10036	0.10147	0.02922	0.04284	542	566
68.589	0.03276	0.03132	0.03163	0.0325	0.0509	0.06635	0.09673	0.10744	0.02798	0.04388	547	578
68.617	0.03245	0.03201	0.03091	0.03096	0.05506	0.06176	0.09689	0.1164	0.02808	0.04714	550	577
68.646	0.03189	0.0301	0.0301	0.03176	0.04943	0.06287	0.09216	0.11024	0.02932	0.04727	522	558
68.674	0.03372	0.0314	0.03015	0.03021	0.05532	0.06492	0.09547	0.09849	0.03067	0.04349	568	623
68.703	0.03427	0.02857	0.03125	0.02892	0.0497	0.06445	0.09878	0.10893	0.02746	0.04622	554	530
68.731	0.03213	0.03239	0.03139	0.02942	0.05385	0.06572	0.09295	0.10688	0.02829	0.04701	518	560
68.76	0.03602	0.02949	0.0311	0.03051	0.04648	0.05827	0.09089	0.11211	0.02767	0.05078	507	545
68.788	0.03245	0.03155	0.02934	0.03221	0.05157	0.06524	0.08679	0.1067	0.02974	0.04479	523	548
68.817	0.03078	0.02979	0.03229	0.03285	0.05693	0.06461	0.08569	0.10875	0.03077	0.0418	517	566
68.845	0.03062	0.02857	0.03191	0.02907	0.05519	0.06556	0.09768	0.10782	0.02901	0.04336	487	542
68.873	0.03237	0.03193	0.02891	0.02957	0.05358	0.06081	0.09626	0.11472	0.02787	0.04219	551	567
68.902	0.03348	0.0314	0.02915	0.02937	0.04983	0.06587	0.09579	0.10409	0.02932	0.0474	522	534
68.93	0.03213	0.03193	0.02977	0.02822	0.0497	0.05986	0.09342	0.10464	0.03108	0.04362	542	579
68.959	0.03316	0.02842	0.03067	0.02967	0.05305	0.06192	0.08932	0.10091	0.03026	0.04453	530	570
68.987	0.0326	0.03109	0.03086	0.02952	0.05305	0.05986	0.08853	0.10483	0.02684	0.0444	509	551
69.016	0.03308	0.03163	0.02948	0.03151	0.05251	0.06255	0.09374	0.10129	0.0287	0.04714	522	560
69.044	0.03316	0.02979	0.02882	0.02887	0.05439	0.06128	0.10478	0.1052	0.02777	0.04974	576	575
69.073	0.03014	0.03056	0.0281	0.02877	0.05305	0.06857	0.09689	0.10185	0.02642	0.05052	568	587
69.101	0.03078	0.03461	0.02882	0.02887	0.05291	0.06477	0.09121	0.11099	0.02663	0.04648	534	559
69.13	0.03205	0.03254	0.02763	0.02678	0.05184	0.06255	0.092	0.10222	0.0286	0.04961	512	533
69.158	0.03141	0.03063	0.03063	0.03086	0.05385	0.06271	0.09105	0.10054	0.02829	0.04674	512	551
69.186	0.033	0.0327	0.03163	0.03126	0.05693	0.05416	0.08884	0.11061	0.02974	0.04518	555	555
69.215	0.03125	0.02987	0.03025	0.02957	0.05224	0.06287	0.0879	0.10297	0.02953	0.04531	543	487
69.243	0.03252	0.0314	0.03034	0.02792	0.05372	0.05954	0.10115	0.11061	0.02953	0.04661	528	532
69.272	0.03388	0.03132	0.02839	0.03081	0.05198	0.06255	0.09863	0.10017	0.02943	0.05039	467	570
69.3	0.03245	0.02865	0.02748	0.02922	0.05546	0.06619	0.09689	0.09868	0.02932	0.04583	496	556
69.329	0.02934	0.03002	0.0291	0.02857	0.05198	0.06128	0.09231	0.09868	0.0315	0.04518	526	566
69.357	0.03006	0.02796	0.03053	0.03191	0.0576	0.06366	0.09153	0.11061	0.03326	0.04688	522	541
69.386	0.03276	0.0301	0.03082	0.02937	0.05586	0.06302	0.08727	0.10744	0.02704	0.04935	517	512
69.414	0.03101	0.03002	0.02982	0.02852	0.05305	0.05986	0.09342	0.09924	0.0286	0.0474	508	499
69.442	0.03268	0.03056	0.0311	0.02872	0.05666	0.06223	0.09547	0.10576	0.02808	0.04492	533	533
69.471	0.0307	0.03262	0.03125	0.02897	0.05372	0.06651	0.09468	0.09924	0.03015	0.04388	531	553
69.499	0.03149	0.02781	0.02715	0.02962	0.05666	0.06556	0.0931	0.10576	0.02891	0.05026	560	551
69.528	0.03284	0.0301	0.02905	0.02718	0.0505	0.06397	0.08774	0.1052	0.02901	0.05013	536	503
69.556	0.03213	0.02979	0.02901	0.02758	0.05626	0.06445	0.08884	0.1052	0.03005	0.05221	497	512
69.585	0.03292	0.02819	0.02925	0.03066	0.05171	0.06128	0.08758	0.10875	0.03015	0.05052	525	537
69.613	0.03054	0.03193	0.02844	0.02897	0.05559	0.05717	0.08916	0.10278	0.02756	0.05117	483	521
69.642	0.02966	0.02972	0.02991	0.02902	0.05332	0.06049	0.09121	0.10558	0.02694	0.05599	536	547
69.67	0.02911	0.02918	0.0292	0.03151	0.0505	0.06619	0.09484	0.11211	0.02673	0.05117	507	515
69.698	0.03284	0.03231	0.0282	0.02917	0.0501	0.06192	0.09516	0.1067	0.02673	0.05404	553	580
69.727	0.03435	0.0288	0.03044	0.03106	0.05506	0.05843	0.09973	0.108	0.02818	0.05703	529	571
69.755	0.03062	0.03086	0.03106	0.03056	0.05345	0.06382	0.09673	0.10949	0.02912	0.04922	517	547
69.784	0.03046	0.03163	0.03039	0.03116	0.04769	0.0616	0.08758	0.10222	0.02756	0.05247	570	517
69.812	0.03252	0.0285	0.02839	0.02882	0.05184	0.06239	0.09342	0.10502	0.02528	0.05091	488	525
69.841	0.03085	0.02956	0.02905	0.03051	0.05224	0.06017	0.09831	0.11024	0.02777	0.05169	486	529
69.869	0.03101	0.02956	0.02815	0.02992	0.05131	0.06318	0.09295	0.1164	0.02984	0.04974	483	493
69.898	0.03101	0.02918	0.02929	0.03056	0.05466	0.06223	0.08648	0.10073	0.02508	0.05013	520	487
69.926	0.02887	0.02903	0.02886	0.03026	0.05157	0.06223	0.09547	0.10147	0.02829	0.04167	509	540
69.955	0.03221	0.03262	0.02967	0.03091	0.04836	0.05606	0.09342	0.0983	0.02497	0.04844	529	541
69.983	0.03364	0.03025	0.02934	0.02782	0.05278	0.06587	0.09878	0.0983	0.02849	0.04206	523	537
70.011	0.03038	0.03323	0.02929	0.02693	0.05157	0.06223	0.08916	0.1052	0.02777	0.04622	521	547
70.04	0.03245	0.02949	0.02696	0.02837	0.05117	0.06524	0.09026	0.10054	0.0258	0.04805	534	529
70.068	0.03205	0.03094	0.02867	0.03001	0.0505	0.06556	0.09626	0.10875	0.02808	0.04362	497	572
70.097	0.03276	0.02834	0.03072	0.02832	0.05559	0.06239	0.09105	0.10427	0.02818	0.04232	518	566
70.125	0.02887	0.03331	0.02934	0.03036	0.05546	0.06302	0.09405	0.10688	0.02808	0.04596	510	514
70.154	0.03332	0.0288	0.02763	0.03051	0.04568	0.05796	0.09468	0.10838	0.02352	0.04766	531	515
70.182	0.03332	0.02781	0.02867	0.02902	0.05318	0.05986	0.09231	0.10949	0.02849	0.04909	476	470
70.211	0.0307	0.02949	0.02805	0.02987	0.04836	0.06065	0.08805	0.10241	0.03181	0.04284	519	491
70.239	0.03356	0.02674	0.03263	0.02723	0.05184	0.05637	0.09926	0.10464	0.02663	0.04622	531	499
70.267	0.03038	0.0275	0.03091	0.02982	0.0505	0.05875	0.10163	0.09924	0.02653	0.04271	502	545
70.296	0.02958	0.02995	0.0282	0.02698	0.05224	0.05922	0.09326	0.0886	0.03005	0.04596	531	530
70.324	0.02998	0.02842	0.03048	0.02763	0.05479	0.06144	0.09263	0.10147	0.02725	0.04648	482	513
70.353	0.03078	0.03033	0.02767	0.02812	0.04876	0.05542	0.08695	0.10875	0.02777	0.04349	495	481
70.381	0.03396	0.03193	0.03001	0.02922	0.04782	0.06429	0.08932	0.10241	0.02912	0.04622	490	518
70.41	0.03133	0.03262	0.03034	0.02678	0.05117	0.05495	0.09089	0.1052	0.0259	0.04023	527	544
70.438	0.03038	0.03231	0.02796	0.02758	0.05291	0.06112	0.09326	0.09961	0.02756	0.04557	520	564
70.467	0.03006	0.03117	0.02972	0.02718	0.05385	0.06287	0.09231	0.10968	0.03046	0.04505	529	503
70.495	0.02926	0.02926	0.02891	0.02997	0.05211	0.06192	0.08916	0.11024	0.02756	0.04193	504	528
70.523	0.03268	0.03178	0.03096	0.03216	0.05385	0.06144	0.09168	0.10875	0.02839	0.04206	548	524
70.552	0.03245	0.02827	0.02891	0.02942	0.05332	0.06112	0.09263	0.09737	0.02953	0.04466	500	512
70.58	0.03054	0.0288	0.02953	0.02867	0.05318	0.06318	0.09626	0.11155	0.02818	0.04336	498	537
70.609	0.0295	0.02949	0.02782	0.03001	0.05466	0.06176	0.09626	0.10931	0.02756	0.04063	488	511
70.637	0.03221	0.02911	0.03067	0.02867	0.05211	0.06144	0.09089	0.11229	0.0287	0.04492	509	507
70.666	0.02966	0.02979	0.02982	0.02947	0.058	0.06397	0.092	0.11043	0.02777	0.04388	500	515
70.694	0.02863	0.03086	0.02848	0.02797	0.05291	0.06397	0.09184	0.10726	0.02787	0.04688	475	493
70.723	0.03189	0.03033	0.03096	0.02907	0.05626	0.05986	0.09658	0.11584	0.02663	0.04779	479	468
70.751	0.03093	0.02842	0.02953	0.03131	0.058	0.06081	0.09468	0.11155	0.02549	0.04388	507	510
70.78	0.03141	0.03117	0.03153	0.02897	0.0501	0.06002	0.08947	0.10763	0.02663	0.0457	476	549
70.808	0.03388	0.02857	0.0291	0.03091	0.04796	0.06556	0.09295	0.11117	0.02663	0.04818	516	479
70.836	0.0303	0.02811	0.02834	0.03071	0.05305	0.06445	0.08585	0.10595	0.02621	0.04401	493	508
70.865	0.03252	0.02765	0.03025	0.02857	0.05425	0.05368	0.086	0.10371	0.02715	0.04492	523	457
70.893	0.03141	0.02911	0.02996	0.02992	0.05506	0.06065	0.09547	0.11789	0.02435	0.04648	564	498
70.922	0.03062	0.02964	0.02915	0.03081	0.05064	0.05891	0.09594	0.11621	0.02725	0.04648	479	583
70.95	0.02974	0.03086	0.0291	0.02882	0.05318	0.05954	0.09358	0.11304	0.02746	0.04349	497	517
70.979	0.03006	0.03147	0.02663	0.02997	0.05117	0.06049	0.09279	0.10464	0.02974	0.04844	534	552
71.007	0.03316	0.0275	0.03005	0.02922	0.05573	0.06081	0.08569	0.10222	0.0286	0.04128	525	534
71.036	0.03332	0.02972	0.03082	0.03031	0.05425	0.0635	0.08648	0.10353	0.02725	0.04505	508	551
71.064	0.03292	0.03201	0.02972	0.03016	0.04943	0.05922	0.09547	0.10464	0.02995	0.0418	498	509
71.092	0.0295	0.02895	0.03034	0.02927	0.04608	0.06366	0.09263	0.10427	0.02818	0.04206	514	471
71.121	0.03245	0.02903	0.03034	0.03176	0.05157	0.06097	0.09484	0.10483	0.02839	0.04023	515	501
71.149	0.03213	0.03048	0.03144	0.03126	0.04823	0.05986	0.08648	0.10297	0.02849	0.04323	509	540
71.178	0.03165	0.03048	0.03034	0.03221	0.05278	0.06017	0.09247	0.09793	0.02746	0.04596	467	554
71.206	0.03316	0.02995	0.03125	0.02957	0.05198	0.05606	0.08521	0.10091	0.02849	0.04336	465	520
71.235	0.03157	0.0285	0.03158	0.03131	0.04729	0.06318	0.09089	0.10819	0.02963	0.04557	485	527
71.263	0.03308	0.02911	0.03306	0.03216	0.04823	0.06223	0.09089	0.10502	0.03005	0.04661	532	499
71.292	0.0326	0.02995	0.03396	0.0335	0.05077	0.06382	0.09263	0.09812	0.03046	0.04583	551	491
71.32	0.03038	0.0288	0.03263	0.03191	0.05117	0.06097	0.08979	0.10893	0.02995	0.04505	486	506
71.348	0.03046	0.02949	0.03401	0.03524	0.05184	0.06192	0.08963	0.10241	0.02963	0.04362	521	531
71.377	0.03348	0.02804	0.03363	0.03221	0.05171	0.06239	0.09121	0.10409	0.03295	0.04766	494	499
71.405	0.03356	0.02643	0.03267	0.0335	0.05332	0.05812	0.09752	0.10446	0.02549	0.04232	503	544
71.434	0.03427	0.02987	0.03201	0.03056	0.04715	0.05827	0.09184	0.10297	0.02922	0.0388	519	550
71.462	0.03149	0.02605	0.03129	0.03325	0.04782	0.05432	0.08837	0.09979	0.02849	0.04596	492	511
71.491	0.033	0.03201	0.03091	0.0326	0.05278	0.05891	0.09358	0.09681	0.03015	0.04193	474	545
71.519	0.03205	0.03254	0.03106	0.03151	0.05573	0.05796	0.095	0.10856	0.0259	0.04284	517	523
71.548	0.03213	0.02712	0.03058	0.02992	0.04769	0.06239	0.09894	0.1052	0.0258	0.04206	542	527
71.576	0.03459	0.02834	0.02986	0.03101	0.05117	0.0616	0.08506	0.10539	0.02995	0.04818	513	497
71.604	0.03062	0.0327	0.02977	0.02947	0.04568	0.0597	0.09563	0.10409	0.0287	0.04674	475	525
71.633	0.03523	0.02697	0.02777	0.02713	0.05077	0.05732	0.09673	0.10315	0.03171	0.04206	498	518
71.661	0.03459	0.02926	0.03044	0.02887	0.04956	0.06207	0.0961	0.10409	0.02528	0.04401	516	480
71.69	0.03324	0.03071	0.03053	0.03101	0.04849	0.06176	0.09263	0.10539	0.02611	0.04063	479	499
71.718	0.03276	0.03048	0.02929	0.02862	0.04983	0.05796	0.09074	0.10931	0.02849	0.04284	514	521
71.747	0.03141	0.02926	0.02853	0.02588	0.05037	0.05796	0.08411	0.10259	0.02611	0.04544	517	542
71.775	0.0307	0.03002	0.03001	0.02952	0.0501	0.06065	0.08758	0.10464	0.02632	0.04622	502	534
71.804	0.03404	0.02911	0.0302	0.02882	0.05131	0.06508	0.08774	0.10707	0.02642	0.0444	493	517
71.832	0.03149	0.02934	0.03029	0.02753	0.05023	0.05827	0.08837	0.09513	0.02611	0.04362	569	505
71.861	0.03141	0.03193	0.02982	0.02887	0.04689	0.06651	0.08663	0.10409	0.02746	0.04271	507	485
71.889	0.03205	0.02926	0.02882	0.02748	0.05117	0.06429	0.09153	0.09849	0.02704	0.04128	497	514
71.917	0.02847	0.0288	0.02863	0.02778	0.04889	0.05542	0.08853	0.097	0.02684	0.04141	507	494
71.946	0.03189	0.03147	0.02848	0.02967	0.05265	0.05859	0.089	0.10091	0.02849	0.04375	511	518
71.974	0.03109	0.0301	0.02901	0.02847	0.05265	0.0578	0.09594	0.10241	0.03015	0.04531	463	574
72.003	0.03173	0.02857	0.02891	0.02857	0.05693	0.05922	0.09342	0.10054	0.02715	0.04258	507	520
72.031	0.03141	0.03056	0.02925	0.02992	0.05479	0.05511	0.09374	0.10241	0.02746	0.04674	510	531
72.06	0.03292	0.02796	0.02763	0.03041	0.05198	0.05717	0.08648	0.10464	0.02539	0.04727	505	473
72.088	0.03356	0.03178	0.02815	0.02942	0.05238	0.05875	0.08537	0.10987	0.02808	0.04375	520	505
72.117	0.03221	0.02949	0.02896	0.02917	0.05077	0.06382	0.09042	0.10409	0.03036	0.04115	446	483
72.145	0.03062	0.03094	0.02829	0.03071	0.04863	0.05669	0.09516	0.10595	0.02632	0.04857	508	485
72.173	0.03332	0.03109	0.02934	0.02748	0.04689	0.06239	0.092	0.09812	0.02539	0.04414	490	497
72.202	0.02966	0.02681	0.02824	0.02912	0.05399	0.06002	0.09484	0.10427	0.02932	0.04453	476	453
72.23	0.02998	0.03048	0.02782	0.03031	0.04876	0.06049	0.09547	0.10614	0.02518	0.04401	479	515
72.259	0.03149	0.03346	0.02467	0.02802	0.05399	0.05796	0.08569	0.10278	0.02787	0.04414	510	530
72.287	0.03245	0.03132	0.02582	0.02892	0.05077	0.06065	0.07969	0.108	0.02621	0.04297	502	512
72.316	0.03125	0.02872	0.0262	0.02638	0.05318	0.05717	0.08474	0.11267	0.02466	0.04883	506	526
72.344	0.03093	0.03216	0.02567	0.02837	0.05345	0.05637	0.08663	0.10987	0.02725	0.04297	512	530
72.373	0.03189	0.02911	0.02834	0.02817	0.04997	0.05558	0.09468	0.10763	0.0259	0.04427	506	531
72.401	0.03412	0.02872	0.02667	0.02822	0.05278	0.06017	0.08995	0.09905	0.02632	0.04297	471	542
72.429	0.03173	0.03018	0.02844	0.02633	0.05305	0.06287	0.08979	0.09774	0.0258	0.04323	456	513
72.458	0.02998	0.03461	0.0291	0.02802	0.05198	0.06065	0.08884	0.10409	0.02808	0.04206	510	500
72.486	0.03268	0.03125	0.03015	0.03006	0.0497	0.05812	0.08821	0.10819	0.02435	0.04388	538	513
72.515	0.03062	0.02827	0.03001	0.02832	0.04662	0.06429	0.08805	0.1067	0.02663	0.04622	548	513
72.543	0.03078	0.02918	0.02963	0.02912	0.04876	0.06097	0.09374	0.10763	0.02725	0.04362	522	477
72.572	0.03229	0.03048	0.02934	0.02977	0.04836	0.05891	0.09121	0.10614	0.02518	0.04375	515	554
72.6	0.03252	0.03056	0.03034	0.02892	0.05238	0.05938	0.09042	0.10035	0.02642	0.04453	486	518
72.629	0.03276	0.02979	0.02753	0.02822	0.04836	0.06366	0.08679	0.09439	0.02383	0.03932	471	526
72.657	0.03388	0.02895	0.02791	0.02877	0.04823	0.06128	0.09153	0.10782	0.02601	0.04349	486	502
72.686	0.03245	0.02781	0.0302	0.02957	0.05841	0.06287	0.08869	0.1039	0.02684	0.0431	553	528
72.714	0.03451	0.02979	0.02772	0.02902	0.0505	0.06112	0.09847	0.09979	0.02331	0.04401	504	527
72.742	0.03173	0.03002	0.02886	0.02972	0.05586	0.05622	0.08727	0.09383	0.02539	0.04102	518	526
72.771	0.03388	0.03422	0.02767	0.02937	0.05224	0.05875	0.0961	0.09756	0.02787	0.04766	512	515
72.799	0.03213	0.03079	0.0291	0.02872	0.0509	0.0597	0.09089	0.09868	0.02746	0.03997	494	517
72.828	0.03308	0.02995	0.02848	0.02773	0.05251	0.06207	0.08553	0.09494	0.02881	0.04531	467	510
72.856	0.03467	0.03063	0.03005	0.02887	0.05479	0.05954	0.08947	0.09979	0.02777	0.04245	511	519
72.885	0.03213	0.03201	0.02982	0.02778	0.05198	0.05859	0.08916	0.10595	0.02549	0.04622	501	505
72.913	0.03404	0.03254	0.02858	0.02708	0.05385	0.06366	0.08695	0.10334	0.02663	0.04688	496	505
72.942	0.0338	0.03392	0.02839	0.02912	0.05224	0.06651	0.09437	0.10035	0.02849	0.04284	513	468
72.97	0.03451	0.03002	0.02691	0.02887	0.04983	0.06508	0.09295	0.09718	0.02746	0.04271	527	475
72.998	0.03475	0.03293	0.02729	0.02792	0.04983	0.05701	0.09247	0.10464	0.02684	0.04036	474	494
73.027	0.03348	0.03125	0.02858	0.02623	0.05117	0.05875	0.09247	0.10632	0.02642	0.04753	534	478
73.055	0.03618	0.03453	0.03005	0.02882	0.04943	0.05986	0.08364	0.10334	0.02901	0.0457	507	504
73.084	0.03181	0.03575	0.02777	0.02787	0.05117	0.05875	0.08758	0.10166	0.02767	0.05156	510	497
73.112	0.03372	0.03262	0.0282	0.02773	0.04889	0.05732	0.08805	0.09718	0.02404	0.04818	512	528
73.141	0.03467	0.03354	0.02944	0.02758	0.05278	0.05542	0.08442	0.10241	0.02881	0.04505	450	503
73.169	0.03093	0.03316	0.02929	0.02922	0.04983	0.05986	0.09074	0.09849	0.02621	0.05234	490	498
73.198	0.03618	0.03147	0.02844	0.02758	0.04769	0.06587	0.08585	0.11155	0.02767	0.04674	497	497
73.226	0.03555	0.034	0.02905	0.02718	0.05278	0.05637	0.08947	0.0983	0.02611	0.04167	477	486
73.254	0.0361	0.03613	0.02801	0.02713	0.05037	0.05907	0.09279	0.09625	0.02601	0.04909	487	488
73.283	0.04056	0.03613	0.02739	0.02638	0.04943	0.06524	0.08427	0.09961	0.02611	0.04349	519	485
73.311	0.03897	0.0372	0.02805	0.02827	0.05238	0.05891	0.09326	0.10707	0.02787	0.04792	537	523
73.34	0.04103	0.03927	0.02891	0.02812	0.05171	0.0597	0.09452	0.1011	0.0257	0.04388	485	491
73.368	0.04414	0.03881	0.02753	0.02952	0.0568	0.05701	0.09105	0.09532	0.02891	0.04987	517	506
73.397	0.04652	0.04011	0.02934	0.02997	0.05559	0.05859	0.08821	0.097	0.02466	0.04518	542	483
73.425	0.0493	0.04141	0.02982	0.03006	0.05037	0.06207	0.08632	0.10297	0.0287	0.04427	465	502
73.454	0.05129	0.04584	0.03005	0.02847	0.05479	0.05922	0.08585	0.10185	0.02632	0.04635	479	519
73.482	0.05408	0.04767	0.03144	0.03191	0.04997	0.06508	0.08506	0.09793	0.0287	0.04362	498	503
73.51	0.0567	0.05011	0.03034	0.02977	0.05653	0.06144	0.08916	0.10353	0.0257	0.0401	524	530
73.539	0.06298	0.05256	0.02839	0.02907	0.05894	0.05907	0.09389	0.10949	0.02912	0.04661	481	549
73.567	0.07555	0.05844	0.02834	0.02867	0.05278	0.05922	0.09216	0.10987	0.02694	0.0444	475	541
73.596	0.08875	0.06547	0.02839	0.02852	0.05332	0.07253	0.095	0.10147	0.02642	0.0444	507	466
73.624	0.0963	0.07846	0.02844	0.02942	0.05466	0.06207	0.09847	0.09961	0.02767	0.04453	494	483
73.653	0.12843	0.09534	0.02872	0.02892	0.05787	0.07063	0.08821	0.10334	0.02704	0.04479	478	498
73.681	0.14982	0.1097	0.02796	0.03066	0.05613	0.06762	0.086	0.10129	0.02621	0.04049	512	527
73.71	0.17583	0.13705	0.02863	0.02877	0.06109	0.0692	0.08679	0.11155	0.02808	0.0474	557	471
73.738	0.18529	0.15432	0.03039	0.02792	0.05975	0.06366	0.08379	0.11397	0.02798	0.04792	499	430
73.767	0.18115	0.17288	0.03101	0.03016	0.06082	0.06873	0.08521	0.10558	0.02435	0.04388	486	527
73.795	0.16072	0.17273	0.02896	0.03106	0.06417	0.07031	0.08442	0.10278	0.03005	0.0457	509	531
73.823	0.14266	0.16478	0.03106	0.02842	0.06403	0.0673	0.08016	0.10464	0.02621	0.04258	499	517
73.852	0.13813	0.14897	0.03082	0.02489	0.06765	0.07379	0.07985	0.09961	0.02653	0.04453	489	514
73.88	0.13002	0.14591	0.03005	0.02693	0.06551	0.07126	0.08553	0.10129	0.02715	0.04596	561	527
73.909	0.12477	0.14041	0.02877	0.02957	0.06685	0.07268	0.08474	0.10334	0.02912	0.0444	522	493
73.937	0.12406	0.13636	0.0272	0.02832	0.07167	0.07902	0.08379	0.11229	0.02663	0.04414	483	532
73.966	0.10918	0.12743	0.02967	0.02797	0.06698	0.08044	0.08663	0.09998	0.02684	0.04414	462	524
73.994	0.08787	0.11146	0.03034	0.03046	0.06631	0.06952	0.09011	0.10147	0.02632	0.04206	449	460
74.023	0.08064	0.10183	0.02882	0.03016	0.06283	0.07458	0.08995	0.09849	0.02632	0.03945	495	542
74.051	0.07252	0.08403	0.02867	0.03131	0.07461	0.08155	0.09374	0.10203	0.02559	0.04518	494	540
74.079	0.06091	0.07387	0.02839	0.02822	0.06805	0.07522	0.08411	0.10427	0.02518	0.04518	455	520
74.108	0.05408	0.06669	0.02867	0.02882	0.06671	0.07601	0.09153	0.10259	0.02912	0.04167	480	534
74.136	0.04636	0.056	0.02844	0.02897	0.06885	0.07173	0.09658	0.10427	0.02466	0.04284	462	521
74.165	0.04429	0.0505	0.02848	0.02738	0.07662	0.07427	0.08805	0.09644	0.02549	0.03646	453	489
74.193	0.04278	0.04798	0.03106	0.02733	0.06644	0.07363	0.09279	0.10147	0.02518	0.03958	521	536
74.222	0.04064	0.04263	0.02691	0.02723	0.05948	0.07332	0.08395	0.10595	0.02487	0.04167	483	481
74.25	0.03968	0.04095	0.02753	0.03091	0.05948	0.07332	0.08932	0.10427	0.02704	0.03971	472	494
74.279	0.03825	0.03873	0.02801	0.02947	0.06805	0.07965	0.09137	0.10017	0.02549	0.04102	498	542
74.307	0.03435	0.03774	0.02915	0.02952	0.06269	0.07205	0.08379	0.11024	0.02839	0.04102	525	508
74.335	0.03905	0.04141	0.02839	0.02802	0.0647	0.07902	0.08853	0.10334	0.02684	0.04401	517	528
74.364	0.03427	0.03568	0.02872	0.03091	0.06256	0.07189	0.08316	0.10539	0.02601	0.04049	470	473
74.392	0.03419	0.03728	0.02886	0.02867	0.06001	0.07063	0.08963	0.10073	0.0315	0.04453	483	544
74.421	0.03396	0.03545	0.03115	0.03171	0.06216	0.06841	0.0879	0.09028	0.02653	0.04883	488	552
74.449	0.03364	0.03453	0.03129	0.03091	0.058	0.0711	0.09437	0.09364	0.02943	0.0375	511	519
74.478	0.03197	0.03422	0.02991	0.02887	0.05586	0.07427	0.0879	0.10875	0.02922	0.04323	520	526
74.506	0.03101	0.03132	0.03148	0.02972	0.05894	0.07728	0.09168	0.09532	0.02798	0.04661	492	533
74.535	0.03292	0.03117	0.03172	0.02882	0.05921	0.07585	0.08679	0.10073	0.02673	0.04206	477	487
74.563	0.03173	0.03247	0.02934	0.03191	0.0647	0.07253	0.09973	0.10632	0.02549	0.04323	499	476
74.592	0.03173	0.03392	0.03144	0.02942	0.05787	0.07807	0.08695	0.1039	0.02798	0.04049	515	483
74.62	0.03412	0.03293	0.03148	0.02952	0.05305	0.07601	0.09437	0.10651	0.02756	0.04362	487	463
74.648	0.03125	0.03506	0.03144	0.03011	0.06189	0.07332	0.08616	0.10632	0.02663	0.04531	491	475
74.677	0.0307	0.03163	0.03234	0.02962	0.05666	0.07253	0.08553	0.10558	0.02559	0.03971	482	497
74.705	0.03229	0.03071	0.02872	0.02787	0.05934	0.07173	0.09295	0.09737	0.02787	0.04427	468	489
74.734	0.02982	0.03575	0.03234	0.03091	0.06082	0.07522	0.09437	0.10241	0.02839	0.04167	511	510
74.762	0.03189	0.0356	0.02939	0.02982	0.05787	0.06397	0.08285	0.10595	0.02653	0.03958	467	493
74.791	0.03101	0.03071	0.02996	0.03061	0.06082	0.07284	0.08648	0.10129	0.02601	0.04414	461	435
74.819	0.03205	0.02956	0.03248	0.0334	0.05787	0.07063	0.08869	0.10726	0.02767	0.04258	502	488
74.848	0.03046	0.02804	0.03229	0.03061	0.0564	0.07237	0.09058	0.1177	0.03015	0.04023	484	511
74.876	0.02799	0.02834	0.03382	0.03151	0.05961	0.07474	0.08616	0.09774	0.02943	0.04036	554	542
74.904	0.03205	0.03224	0.03558	0.03051	0.06149	0.07063	0.09231	0.10315	0.02435	0.04583	467	495
74.933	0.03332	0.03117	0.03415	0.02957	0.05948	0.07078	0.09137	0.10819	0.02735	0.04323	507	487
74.961	0.03181	0.0301	0.03258	0.03061	0.06175	0.07142	0.08979	0.10912	0.02352	0.0431	502	488
74.99	0.03197	0.03308	0.03491	0.03081	0.05774	0.07411	0.0879	0.09961	0.02684	0.03984	468	490
75.018	0.02974	0.03193	0.03391	0.0335	0.06256	0.06904	0.09074	0.10371	0.02694	0.04193	497	543
75.047	0.03245	0.03247	0.03453	0.0338	0.06028	0.073	0.09042	0.10632	0.02746	0.04193	484	502
75.075	0.02839	0.03094	0.03601	0.03225	0.05707	0.07728	0.08521	0.10632	0.02653	0.0457	469	455
75.104	0.0303	0.03285	0.03648	0.03569	0.05733	0.06746	0.09358	0.11397	0.0286	0.04258	480	499
75.132	0.02879	0.03002	0.03772	0.03325	0.05774	0.07379	0.08869	0.11434	0.02653	0.03867	454	491
75.16	0.03245	0.02773	0.03829	0.0325	0.0635	0.07648	0.09358	0.10595	0.02508	0.03841	474	519
75.189	0.03006	0.03239	0.0412	0.03668	0.06135	0.07205	0.08853	0.11061	0.0286	0.03919	529	495
75.217	0.02958	0.0301	0.04382	0.03833	0.05626	0.07411	0.09642	0.10707	0.02663	0.04128	480	496
75.246	0.02815	0.03071	0.0462	0.03673	0.06845	0.07348	0.09815	0.1108	0.02673	0.03945	514	522
75.274	0.02839	0.02773	0.04415	0.04007	0.05961	0.07411	0.10005	0.10968	0.0257	0.04193	499	536
75.303	0.03006	0.0304	0.05111	0.04131	0.06604	0.0692	0.10668	0.10782	0.03015	0.04492	495	552
75.331	0.02887	0.03079	0.05682	0.045	0.06256	0.07427	0.10305	0.11248	0.02653	0.04362	455	525
75.36	0.03133	0.02918	0.05925	0.04664	0.06376	0.07759	0.1103	0.10726	0.02694	0.04141	479	527
75.388	0.03141	0.03308	0.06382	0.05291	0.06685	0.07427	0.10778	0.11043	0.02829	0.04258	493	518
75.417	0.0303	0.03048	0.07135	0.05908	0.06189	0.07759	0.11393	0.12722	0.02508	0.04557	463	574
75.445	0.03006	0.03079	0.07183	0.06406	0.06283	0.0787	0.12167	0.11882	0.02456	0.04479	486	519
75.473	0.03467	0.02987	0.08369	0.06879	0.06591	0.07965	0.11898	0.12199	0.03036	0.04427	491	526
75.502	0.03093	0.03201	0.09216	0.07471	0.06403	0.0787	0.12182	0.12628	0.02684	0.04284	486	571
75.53	0.03237	0.02872	0.10402	0.08751	0.07341	0.07553	0.1376	0.13039	0.02435	0.04193	487	507
75.559	0.03101	0.0301	0.11469	0.09681	0.07395	0.07854	0.13713	0.13132	0.02414	0.04323	486	523
75.587	0.02823	0.02811	0.12894	0.1104	0.07676	0.08013	0.13571	0.1468	0.02331	0.04401	465	529
75.616	0.03149	0.02956	0.13556	0.11961	0.07341	0.08456	0.1406	0.14158	0.02632	0.04284	499	512
75.644	0.03006	0.03025	0.14022	0.12872	0.07274	0.09264	0.14976	0.14624	0.02559	0.04596	476	553
75.673	0.03173	0.03018	0.13675	0.13957	0.08104	0.09232	0.15023	0.14792	0.0259	0.04427	487	527
75.701	0.03085	0.03002	0.13941	0.13624	0.08279	0.08994	0.16632	0.1524	0.02767	0.04206	513	482
75.729	0.03205	0.02995	0.12984	0.12987	0.08681	0.0985	0.16159	0.15986	0.02466	0.0431	507	526
75.758	0.03396	0.03063	0.12193	0.12066	0.08814	0.09739	0.1649	0.16993	0.02601	0.04128	517	494
75.786	0.0268	0.02765	0.11588	0.11707	0.09846	0.108	0.1769	0.17273	0.0287	0.04284	463	520
75.815	0.03054	0.02872	0.11498	0.1102	0.10127	0.11306	0.17169	0.1759	0.02808	0.04531	474	467
75.843	0.02823	0.02934	0.10988	0.10886	0.11025	0.11306	0.17374	0.1815	0.0259	0.04284	502	469
75.872	0.02998	0.03018	0.10021	0.10174	0.11869	0.12652	0.16459	0.16583	0.02611	0.04049	453	503
75.9	0.02895	0.02926	0.08659	0.09308	0.11815	0.13112	0.17216	0.17273	0.02839	0.04284	462	475
75.929	0.02879	0.03094	0.07759	0.08074	0.12405	0.13238	0.16806	0.16657	0.02559	0.04479	457	515
75.957	0.03125	0.02773	0.0674	0.07437	0.13088	0.14584	0.16617	0.16956	0.02808	0.03802	544	500
75.985	0.02934	0.02964	0.06211	0.06391	0.13275	0.1479	0.16128	0.1621	0.02466	0.04023	507	497
76.014	0.03101	0.02788	0.05578	0.06237	0.13637	0.15297	0.14565	0.15557	0.0257	0.0431	521	493
76.042	0.02895	0.02811	0.0513	0.05241	0.14508	0.15376	0.14897	0.16844	0.02663	0.04271	470	508
76.071	0.03078	0.02811	0.04458	0.04863	0.14387	0.1555	0.14628	0.16303	0.02746	0.04271	520	491
76.099	0.03141	0.02872	0.04244	0.04664	0.14481	0.15265	0.13303	0.15986	0.02715	0.04049	537	548
76.128	0.03412	0.02964	0.0402	0.04211	0.15486	0.146	0.12845	0.15053	0.02632	0.0362	526	520
76.156	0.02918	0.02788	0.0401	0.04146	0.14709	0.15123	0.13366	0.15109	0.02735	0.04141	488	521
76.185	0.0307	0.02995	0.0391	0.03878	0.14092	0.14964	0.13019	0.13915	0.02518	0.04388	510	451
76.213	0.0268	0.02819	0.03563	0.03833	0.1432	0.14537	0.12956	0.14456	0.02704	0.04115	527	472
76.241	0.03165	0.02934	0.03548	0.03778	0.13423	0.13317	0.13334	0.1509	0.02735	0.04505	514	502
76.27	0.03221	0.02468	0.03701	0.03519	0.12806	0.13413	0.1223	0.13803	0.02694	0.04049	518	485
76.298	0.0303	0.02995	0.03372	0.03604	0.12954	0.13413	0.12151	0.13542	0.02653	0.03841	497	508
76.327	0.02799	0.02918	0.03396	0.0333	0.12204	0.13824	0.11378	0.14344	0.02611	0.04323	471	514
76.355	0.03038	0.0288	0.03286	0.03365	0.11641	0.1251	0.11472	0.12684	0.02559	0.04362	471	537
76.384	0.0326	0.02918	0.03125	0.03265	0.11386	0.11275	0.11772	0.1302	0.02715	0.04362	516	514
76.412	0.02648	0.0288	0.03244	0.0328	0.11453	0.11259	0.11535	0.1246	0.02891	0.0474	513	535
76.441	0.02775	0.02911	0.03001	0.03051	0.09993	0.09913	0.11977	0.13057	0.02725	0.03789	492	538
76.469	0.03181	0.0262	0.0321	0.03116	0.08707	0.09834	0.11393	0.12572	0.02953	0.04271	516	485
76.498	0.0295	0.02987	0.03158	0.03166	0.09176	0.08773	0.10715	0.13729	0.02435	0.03906	503	529
76.526	0.026	0.02773	0.03053	0.03091	0.09069	0.09454	0.11267	0.12554	0.0258	0.04284	500	518
76.554	0.03014	0.02689	0.02915	0.03136	0.08252	0.09375	0.11551	0.12087	0.02818	0.04063	505	479
76.583	0.03014	0.02796	0.03401	0.03285	0.07046	0.09375	0.11204	0.12554	0.02601	0.04896	483	515
76.611	0.02688	0.02842	0.03315	0.02997	0.07301	0.09153	0.11315	0.12386	0.02725	0.04635	530	509
76.64	0.02672	0.02979	0.03272	0.03131	0.07194	0.09089	0.10746	0.1246	0.02673	0.04219	464	489
76.668	0.0307	0.02872	0.03244	0.0332	0.06537	0.07633	0.10115	0.13244	0.02383	0.04258	501	499
76.697	0.03141	0.02513	0.03191	0.03355	0.06443	0.07949	0.11109	0.12889	0.0257	0.04258	462	492
76.725	0.02911	0.02567	0.0321	0.03131	0.06256	0.08171	0.11062	0.13113	0.02456	0.04375	475	507
76.754	0.02895	0.02758	0.03005	0.03166	0.06765	0.07633	0.10573	0.12367	0.0257	0.04219	494	490
76.782	0.03141	0.02872	0.0301	0.02947	0.06323	0.06904	0.10604	0.12348	0.02839	0.0457	492	499
[truncated: 1,168 more rows]

## Sheet: Figure 3
	Reclectance	Reclectance	Reclectance	Reclectance	Reclectance	Reclectance	Reclectance	Reclectance	Reclectance	Reclectance	Reclectance	Reclectance
	%R	%R	%R	%R	%R	%R	%R	%R	%R	%R	%R	%R
wavelength	BaZrO3	La,Rh:BaZrO3	SrZrO3	La,Rh:SrZrO3	BaZr0.5Ti0.5O3	La,Rh:BaZr0.5Ti0.5O3	SrZr0.5Ti0.5O3	La,Rh:SrZr0.5Ti0.5O3	BaTiO3	La,Rh:BaTiO3	SrTiO3	La,Rh:SrTiO3											La,Rh:SZT	La,Rh:BZT
800	109.68	41.7913	136.788	53.4653	97.9943	53.101	102.447	65.2186	95.7342	20.8816	95.9437	53.719
799	109.124	41.8253	136.836	53.3269	98.0285	52.888	102.577	65.0583	95.7805	20.9067	96.0818	53.625
798	109.241	41.6633	136.438	53.222	98.2832	52.8776	102.388	64.8805	95.6492	20.8673	96.0427	53.8514
797	109.216	41.5259	136.184	53.0674	98.5437	52.8375	102.566	65.0857	95.7692	20.6785	95.782	53.7064
796	109.569	41.6652	136.807	53.2744	97.9522	52.6659	102.413	64.7953	96.1259	20.6979	96.0139	53.5164
795	108.845	41.7107	136.096	53.4723	97.9242	52.6657	102.381	65.1557	96.1421	20.7525	96.1149	53.5941
794	108.878	41.5932	136.18	53.1721	98.0023	52.5436	102.451	64.9482	95.6673	20.6773	96.1101	53.4409
793	108.953	41.5664	136.499	53.3736	98.222	52.6452	102.539	64.9752	96.0245	20.7001	96.0394	53.5677
792	109.025	41.6172	136.766	53.4947	98.258	52.2107	102.662	64.5077	96.0369	20.5872	95.8672	53.5289
791	108.645	41.5817	135.982	53.3045	98.1303	52.3355	102.325	64.8895	95.9179	20.6631	96.0638	53.3078
790	108.84	41.4076	136.928	53.3025	98.09	52.1561	102.548	64.812	95.6914	20.4769	95.8364	53.2477
789	108.967	41.4702	136.654	53.1274	98.0663	52.1934	102.569	64.6504	95.921	20.4814	95.793	53.2694
788	108.568	41.4137	136.02	53.1702	97.8245	52.222	102.059	64.7128	95.9854	20.5008	95.8693	53.046
787	108.634	41.4013	136.69	53.2614	97.9607	51.8848	102.436	64.4891	96.1825	20.4341	96.0895	53.2442
786	108.656	41.4656	136.107	53.2503	97.7897	51.8639	102.342	64.5782	95.7522	20.3083	95.9778	53.1954
785	108.387	41.3657	136.396	53.3463	97.7886	51.5923	102.493	64.4546	95.95	20.3681	95.9594	53.162
784	108.17	41.4223	135.902	53.499	97.8625	51.6788	102.44	64.4041	95.6873	20.2204	95.7503	52.857
783	108.118	41.3942	136.133	53.4328	97.5754	51.6855	102.132	64.5357	95.7833	20.2323	95.6433	52.8166
782	108.229	41.3928	135.818	53.4219	97.7169	51.5842	102.356	64.3392	95.8407	20.1835	95.6048	53.0267
781	108.332	41.3885	136.378	53.4277	97.5514	51.3883	101.942	64.1374	95.8139	20.1912	95.7512	52.9304
780	108.099	41.3368	136.004	53.4431	97.7163	51.3557	102.035	64.1883	95.8847	20.074	95.7811	52.7132
779	108.001	41.4136	136.075	53.4785	97.51	51.253	102.284	64.323	95.5825	20.0167	95.6153	52.7036
778	107.695	41.3868	136.267	53.3872	97.7722	51.0408	102.122	64.041	96.0251	20.0224	95.9486	52.7507
777	107.851	41.3053	136.025	53.401	97.5872	50.937	102.275	63.8497	95.8264	19.9837	95.5517	52.7133
776	107.84	41.3629	136.017	53.498	97.4461	50.882	102.014	63.9253	95.7167	19.9009	95.5879	52.9105
775	107.591	41.316	135.94	53.3238	97.8299	50.9981	102.064	64.0793	96.0424	19.9574	95.8228	52.5508
774	107.818	41.1418	136.129	53.4555	97.4831	50.886	101.77	63.9707	95.8307	19.812	95.7087	52.5753
773	107.795	41.1546	135.976	53.4864	97.4184	50.6678	102.433	63.7273	95.7139	19.799	95.5944	52.3843
772	107.41	41.1627	135.628	53.5053	97.6018	50.7858	102.11	64.0089	95.8821	19.7192	95.5627	52.2354
771	107.333	41.0698	135.781	53.3722	97.089	50.5359	101.997	63.7129	95.7428	19.7497	95.5129	52.3953
770	107.132	41.1688	135.354	53.3508	97.1306	50.4473	101.679	63.8045	95.6829	19.6581	95.5409	52.2232
769	107.429	41.1892	135.424	53.4186	97.402	50.4274	101.902	63.711	95.8384	19.646	95.6409	52.1325
768	107.273	41.0579	135.732	53.4797	97.0501	50.3446	101.881	63.5002	95.8306	19.56	95.466	52.1402
767	107.322	40.9053	135.589	53.3453	96.9513	50.2939	101.879	63.4577	95.7649	19.5579	95.5792	52.0042
766	106.962	41.2041	135.061	53.5243	97.4243	50.1192	102.054	63.4362	95.8505	19.4729	95.5961	51.925
765	107.044	40.9293	135.6	53.4726	97.3783	50.0625	102.048	63.4031	95.7363	19.4733	95.4775	51.7455
764	106.731	41.0356	135.436	53.2924	97.0253	49.8564	102.113	63.3443	95.7126	19.3625	95.5722	51.7656
763	106.679	41.083	135.154	53.4367	97.4423	49.773	101.929	63.2538	95.9078	19.395	95.4913	51.9705
762	106.7	40.966	135.212	53.433	97.0881	49.8375	101.802	63.206	95.9335	19.3704	95.6694	51.7593
761	106.431	40.9797	135.171	53.4708	97.0906	49.734	101.924	63.1233	95.8242	19.3043	95.4266	51.6416
760	106.54	40.8837	135.473	53.4381	97.0319	49.5498	101.932	62.9564	95.8849	19.2182	95.5076	51.439
759	106.263	40.8638	134.982	53.4231	97.1639	49.4617	101.923	63.0128	95.9093	19.2031	95.3562	51.3963
758	106.345	40.8791	135.377	53.3736	97.0612	49.3569	101.932	63.0891	95.936	19.1857	95.3392	51.5231
757	106.443	40.8564	135.237	53.3708	96.8927	49.1847	101.654	62.7546	95.9524	19.1868	95.4615	51.3962
756	106.098	40.8259	134.807	53.4689	96.7138	49.2771	101.72	63.0283	95.8897	19.1036	95.4653	51.2519
755	105.991	40.6921	134.91	53.3995	96.8121	49.2042	101.619	62.7687	95.7504	18.9719	95.1958	51.3028
754	106.129	40.8587	134.995	53.4281	96.9422	49.0156	101.686	62.6416	95.7588	19.0242	95.463	51.2415
753	106.012	40.8065	134.946	53.4164	97.1163	49.0084	101.866	62.609	95.757	18.9366	95.2157	51.028
752	105.855	40.7864	134.727	53.4268	96.857	48.89	101.692	62.5726	95.8345	18.9332	95.5423	50.7942
751	105.842	40.7455	134.583	53.4661	96.7911	48.9074	101.716	62.4402	95.823	18.8723	95.3862	50.8207
750	105.938	40.7682	134.797	53.4751	96.7584	48.7733	101.68	62.4842	95.6037	18.7705	95.1792	50.7026
749	105.601	40.6884	134.411	53.4573	96.7697	48.5755	101.588	62.2463	95.8234	18.7457	95.3101	50.7325
748	105.79	40.6518	134.582	53.4721	96.5325	48.5695	101.648	62.2938	95.7581	18.6997	95.326	50.5031
747	105.48	40.6045	134.587	53.444	96.6532	48.3765	101.602	62.1413	95.6745	18.5956	95.1458	50.6131
746	105.388	40.6654	134.257	53.4189	96.474	48.3783	101.62	62.0125	95.9621	18.6225	95.1824	50.4205
745	105.419	40.6813	134.379	53.3871	96.6066	48.1854	101.477	62.1666	95.5539	18.5121	95.0714	50.451
744	105.256	40.604	134.176	53.4299	96.2945	48.267	101.29	62.1119	95.8007	18.4961	95.1403	50.2598
743	105.33	40.5254	134.283	53.4136	96.4273	48.3018	101.504	62.0361	95.9402	18.4616	95.0415	50.2675
742	105.227	40.5158	134.236	53.5523	96.622	48.0479	101.679	62.0939	95.7047	18.3974	95.0103	50.1908
741	105.073	40.5274	134.322	53.4932	96.4471	47.9488	101.585	61.9297	95.786	18.3677	95.1141	50.0912
740	104.933	40.5665	134.032	53.372	96.4553	47.7756	101.448	61.7601	95.76	18.3312	95.171	49.9522
739	105.005	40.5319	133.875	53.4451	96.4683	47.6922	101.541	61.8396	95.7152	18.2905	95.06	49.8804
738	104.833	40.4974	134.056	53.4013	96.4427	47.6052	101.514	61.6737	95.671	18.1885	94.8944	49.6755
737	105.002	40.4601	134.109	53.41	96.2715	47.5316	101.438	61.6859	95.6779	18.134	94.8622	49.754
736	104.839	40.3215	133.963	53.3852	96.1617	47.5825	101.389	61.5482	95.6107	18.0728	94.8083	49.6571
735	104.67	40.331	133.556	53.3996	96.1514	47.4267	101.333	61.5736	95.6509	18.071	94.8337	49.5937
734	104.525	40.4871	133.618	53.4097	96.2147	47.2996	101.347	61.3376	95.7259	18.0712	94.8967	49.5586
733	104.551	40.3379	133.513	53.4925	96.0543	47.1493	101.156	61.2189	95.6452	17.9479	94.7773	49.5105
732	104.405	40.3342	133.372	53.3157	96.0501	47.0414	101.172	61.1124	95.5835	17.9221	94.7105	49.4124
731	104.414	40.3223	133.498	53.3585	96.0984	47.1116	101.159	61.1144	95.7574	17.8687	94.854	49.1227
730	104.429	40.305	133.4	53.4553	95.9984	46.9725	101.048	61.2044	95.8235	17.8173	94.7882	49.2003
729	104.094	40.2174	133.172	53.321	96.0628	46.8836	100.953	61.0238	95.6785	17.7878	94.7232	49.1775
728	104.343	40.245	133.215	53.329	95.9517	46.7588	101.115	60.9717	95.6261	17.7217	94.7367	48.941
727	104.162	40.1486	132.973	53.2735	95.9059	46.7263	101.058	60.8204	95.5876	17.6749	94.582	48.8364
726	104.034	40.1373	132.874	53.3107	95.915	46.6825	101.094	60.8402	95.6627	17.6492	94.6537	48.7885
725	103.985	40.2203	132.869	53.2856	96.0714	46.6288	101.144	60.8389	95.5424	17.5765	94.5349	48.6994
724	103.88	40.2802	132.659	53.355	95.9566	46.4669	101.137	60.7828	95.5754	17.5268	94.5379	48.5716
723	103.961	40.1725	132.817	53.2523	95.8532	46.4314	101.003	60.6614	95.524	17.4551	94.5261	48.49
722	103.83	40.1095	132.544	53.1873	95.755	46.3075	100.996	60.4093	95.634	17.4654	94.47	48.3209
721	103.789	40.1148	132.802	53.2532	95.5579	46.2727	100.76	60.4527	95.7267	17.4238	94.5348	48.3333
720	103.662	40.1331	132.579	53.2125	95.6833	46.1622	100.854	60.4274	95.6262	17.3512	94.5844	48.2415
719	103.589	40.0997	132.33	53.1892	95.6424	46.1145	100.674	60.39	95.6062	17.2891	94.4221	48.0149
718	103.788	40.0542	132.444	53.2587	95.6116	45.9841	100.891	60.2585	95.6242	17.249	94.385	48.0041
717	103.526	39.9703	132.18	53.2344	95.6475	45.9597	100.877	60.1981	95.7204	17.2215	94.4031	47.86
716	103.692	39.9021	132.471	53.034	95.7891	45.9486	100.776	60.2741	95.5563	17.1643	94.2473	47.8329
715	103.587	39.9604	132.081	53.2017	95.6903	45.7678	100.697	60.1757	95.5291	17.0744	94.3217	47.7164
714	103.625	39.9404	132.243	53.1401	95.5481	45.7063	100.596	60.0256	95.5288	17.064	94.3227	47.5779
713	103.27	39.9254	131.825	53.1399	95.4554	45.6432	100.636	60.0121	95.5785	17.0208	94.2942	47.5682
712	103.181	39.9399	131.872	53.0996	95.352	45.4615	100.611	59.8401	95.6425	16.9781	94.2557	47.311
711	103.245	39.7918	131.792	52.999	95.3926	45.534	100.63	59.8935	95.4926	16.9246	94.1351	47.3217
710	103.146	39.8521	131.572	53.1659	95.3731	45.3824	100.712	59.7415	95.5542	16.8653	94.181	47.1965
709	103.198	39.7228	131.679	53.0399	95.381	45.2667	100.563	59.6425	95.5383	16.8143	94.0911	47.0047
708	103.061	39.7128	131.608	52.9533	95.1408	45.2313	100.424	59.6228	95.4438	16.7862	94.0957	46.9708
707	103.037	39.699	131.354	52.9472	95.241	45.1368	100.512	59.5737	95.5752	16.7526	94.0444	46.8658
706	103.048	39.7393	131.108	53.0017	95.229	45.2095	100.417	59.5121	95.4074	16.7115	94.0881	46.6812
705	102.782	39.7357	131.182	52.9595	95.2852	45.0682	100.451	59.5478	95.5062	16.6368	93.9657	46.5865
704	102.918	39.6951	131.139	52.9378	95.1574	44.9925	100.42	59.398	95.5684	16.6087	94.0043	46.4235
703	102.851	39.6446	130.805	52.9335	95.0753	44.8631	100.321	59.4053	95.4026	16.5325	93.9248	46.3351
702	102.632	39.6882	130.657	52.953	95.0917	44.7881	100.343	59.2943	95.5138	16.4989	93.935	46.2934
701	102.677	39.6069	130.853	52.9735	95.1184	44.7251	100.265	59.1216	95.4864	16.4743	93.9063	46.1189
700	102.745	39.5759	130.652	52.7833	94.9076	44.6642	100.187	59.039	95.4705	16.4508	93.916	46.1041
699	102.379	39.5241	130.423	52.8501	94.8536	44.5606	100.028	59.0263	95.526	16.3927	93.8981	45.9958
698	102.651	39.5526	130.553	52.8465	94.8462	44.5164	100.158	58.9782	95.4738	16.3194	93.8714	45.8887
697	102.599	39.5193	130.247	52.7505	95.0076	44.4271	100.139	58.891	95.4244	16.2819	93.7986	45.7163
696	102.454	39.4091	130.088	52.7496	95.0426	44.3839	100.2	58.7914	95.3651	16.2154	93.6911	45.7046
695	102.454	39.4383	130.206	52.7485	94.7094	44.2487	100.094	58.7946	95.4389	16.1828	93.6696	45.5514
694	102.511	39.4608	130.288	52.6434	94.8793	44.2687	100.096	58.8282	95.2676	16.1432	93.528	45.4793
693	102.332	39.3811	129.819	52.6229	94.8659	44.1508	100.169	58.5869	95.3379	16.1117	93.4443	45.2994
692	102.239	39.2956	129.824	52.6153	94.7473	44.1375	99.9717	58.562	95.3843	16.0452	93.5895	45.1894
691	102.166	39.3705	129.68	52.6125	94.6532	44.0673	99.867	58.5587	95.378	16.0079	93.493	45.0724
690	102.201	39.2885	129.563	52.5544	94.7594	43.954	99.9009	58.381	95.3199	15.9635	93.4198	45.0676
689	102.089	39.2988	129.514	52.5758	94.6751	43.9874	99.7477	58.4541	95.3931	15.9515	93.463	45.0007
688	101.929	39.302	129.322	52.5668	94.6283	43.787	99.7099	58.2761	95.3035	15.8867	93.3665	44.8556
687	101.927	39.2099	129.253	52.3918	94.5655	43.722	99.5562	58.2987	95.3274	15.8708	93.3148	44.7289
686	101.839	39.2376	129.071	52.4334	94.5721	43.6713	99.754	58.1997	95.3036	15.8179	93.2595	44.6257
685	101.827	39.1422	129.023	52.4021	94.5841	43.6362	99.577	58.1091	95.3058	15.7623	93.2693	44.5302
684	101.717	39.1587	128.877	52.3737	94.455	43.5572	99.5393	58.0434	95.383	15.7587	93.2097	44.4499
683	101.72	39.1132	128.749	52.3154	94.4218	43.5168	99.5137	58.0525	95.3657	15.7008	93.1711	44.3054
682	101.83	39.0588	128.695	52.2836	94.4211	43.4559	99.43	57.9271	95.3316	15.6595	93.1737	44.2375
681	101.751	39.0807	128.74	52.3279	94.4295	43.3787	99.4776	57.9051	95.4191	15.6348	93.2131	44.2398
680	101.691	39.0455	128.495	52.2973	94.0957	43.2991	99.3601	57.8558	95.2379	15.5595	92.956	44.0801
679	101.528	39.061	128.461	52.2892	94.2182	43.1726	99.2486	57.7189	95.4039	15.552	93.0272	43.918
678	101.554	39.0028	128.243	52.1872	94.1965	43.156	99.2888	57.7214	95.3581	15.4843	92.9523	43.8717
677	101.429	38.9685	128.236	52.1806	94.2255	43.1081	99.2713	57.6541	95.307	15.4224	92.8704	43.723
676	101.424	38.9494	128.165	52.1484	94.1224	43.0333	99.1919	57.553	95.4213	15.414	92.8994	43.6396
675	101.405	38.891	128.069	52.1032	94.0847	42.9788	99.2013	57.5297	95.4098	15.3884	92.9005	43.6353
674	101.181	38.9096	127.86	52.0689	94.1658	42.9068	99.2405	57.4445	95.3057	15.3229	92.8358	43.5255
673	101.147	38.8056	127.739	51.9499	93.9882	42.8007	99.0651	57.3683	95.3567	15.3116	92.8016	43.4171
672	101.162	38.8332	127.714	51.9752	94.0746	42.7345	99.1817	57.2943	95.3358	15.2573	92.7688	43.3355
671	101.063	38.7984	127.583	52.0051	94.0106	42.6674	99.082	57.1625	95.3193	15.234	92.6551	43.3027
670	101.008	38.7691	127.474	51.8723	93.9363	42.5792	98.9759	57.1815	95.2757	15.1831	92.6135	43.2082
669	100.993	38.7243	127.399	51.8753	93.9049	42.4845	98.8681	57.098	95.2841	15.153	92.6499	43.095
668	100.93	38.6919	127.304	51.8275	93.8626	42.4885	98.8733	57.108	95.279	15.1117	92.601	43.0201
667	100.725	38.6583	127.097	51.8406	93.7553	42.406	98.7724	57.0094	95.352	15.0885	92.598	42.9313
666	100.673	38.6035	127.083	51.7288	93.7627	42.3724	98.81	57.0196	95.3104	15.0591	92.6253	42.8251
665	100.676	38.59	126.921	51.6924	93.8369	42.3152	98.7969	56.9684	95.3601	15.0252	92.5132	42.7223
664	100.519	38.5093	126.844	51.7266	93.6276	42.2489	98.654	56.8441	95.2864	14.9836	92.4935	42.6657
663	100.495	38.4632	126.958	51.6887	93.5847	42.2045	98.5842	56.7308	95.3685	14.9461	92.4258	42.6228
662	100.436	38.4401	126.67	51.6031	93.6802	42.0721	98.5965	56.666	95.3011	14.9376	92.2928	42.4934
661	100.41	38.4403	126.689	51.5075	93.6707	42.0464	98.6045	56.6618	95.3402	14.8993	92.3316	42.4287
660	100.205	38.3488	126.557	51.5339	93.6033	41.9794	98.3928	56.5672	95.3211	14.8754	92.2304	42.3721
659	100.061	38.2609	126.326	51.4728	93.5114	41.8893	98.3916	56.5238	95.2467	14.811	92.179	42.3396
658	99.9849	38.2596	126.322	51.4203	93.4486	41.8084	98.2906	56.409	95.3403	14.7917	92.2113	42.2669
657	99.7911	38.1997	126.213	51.446	93.5149	41.7745	98.416	56.3982	95.4128	14.7699	92.18	42.1568
656	99.7713	38.1986	126.182	51.408	93.5243	41.675	98.3001	56.2998	95.3314	14.7201	92.0327	42.0852
655	99.661	38.1249	125.934	51.3623	93.5468	41.6115	98.3068	56.297	95.2975	14.6898	92.0032	41.9939
654	99.4278	38.0821	125.892	51.3624	93.328	41.609	98.153	56.2164	95.3962	14.6911	92.1076	41.918
653	99.3098	38.0294	125.739	51.2422	93.2726	41.4911	98.0619	56.1325	95.2786	14.6437	92.0215	41.8838
652	99.1789	37.9702	125.718	51.2582	93.2638	41.4299	97.9335	56.1238	95.3301	14.5976	91.9162	41.8428
651	98.9556	37.8848	125.68	51.2151	93.2404	41.3765	97.9394	56.0873	95.3672	14.5753	91.9454	41.7822
650	98.9346	37.8591	125.642	51.2294	93.366	41.3129	98.0321	56.0361	95.4608	14.5809	91.9074	41.7741
649	98.8277	37.8172	125.463	51.1827	93.3995	41.1423	98.0358	55.9871	95.3931	14.5448	91.9004	41.6605
648	98.7038	37.7849	125.546	51.1628	93.1628	41.0975	97.8697	55.861	95.3944	14.5023	91.7792	41.5836
647	98.5464	37.6635	125.408	51.0977	93.0773	41.1135	97.7891	55.9075	95.476	14.4948	91.8008	41.5333
646	98.3724	37.6775	125.352	51.0712	93.1067	40.9775	97.8114	55.8027	95.3732	14.4557	91.6512	41.4266
645	98.1928	37.5478	125.163	51.0169	93.1061	40.9524	97.8471	55.7851	95.3916	14.4453	91.6818	41.3756
644	98.0356	37.5317	125.108	50.932	93.0676	40.8714	97.7908	55.7213	95.4061	14.4189	91.6014	41.3264
643	97.8133	37.4903	125.114	50.9287	93.0858	40.8073	97.6548	55.7282	95.3843	14.4004	91.6924	41.2622
642	97.7592	37.4332	124.97	50.9606	93.0844	40.7288	97.57	55.6718	95.4638	14.3836	91.6374	41.1789
641	97.5383	37.3446	124.908	50.9216	93.1119	40.6521	97.627	55.5759	95.3764	14.3595	91.5796	41.1777
640	97.3655	37.3205	124.823	50.9064	92.9457	40.5702	97.5817	55.4925	95.3982	14.3574	91.5606	41.0642
639	97.2935	37.2353	124.875	50.8018	92.9761	40.5215	97.4443	55.4529	95.3641	14.3034	91.4491	41.0475
638	97.1004	37.1548	124.732	50.7649	92.8843	40.4729	97.4104	55.4445	95.4866	14.2805	91.4779	41.055
637	96.8821	37.1161	124.635	50.7329	92.843	40.4334	97.3895	55.4627	95.5792	14.2646	91.4789	40.9423
636	96.7337	37.0424	124.513	50.7879	92.7329	40.2741	97.3403	55.3347	95.5424	14.2618	91.4647	40.8693
635	96.4805	36.9949	124.41	50.7181	92.7755	40.1776	97.3352	55.3056	95.5052	14.229	91.4171	40.8575
634	96.3891	36.9324	124.44	50.6505	92.7768	40.1314	97.0795	55.2429	95.4736	14.2005	91.3251	40.7869
633	96.3265	36.8265	124.404	50.6221	92.8623	40.0525	97.2644	55.2111	95.4657	14.1793	91.2549	40.7483
632	95.9654	36.769	124.256	50.5344	92.764	39.9566	97.1514	55.1679	95.3871	14.1448	91.1312	40.6993
631	95.8076	36.7032	124.25	50.5747	92.6834	39.8977	97.1478	55.1017	95.5654	14.1406	91.1825	40.6752
630	95.7629	36.6153	124.195	50.5198	92.7343	39.8453	97.1551	54.9994	95.4551	14.1194	91.0956	40.5368
629	95.431	36.5423	124.056	50.4091	92.8478	39.8383	97.1946	55.0113	95.4517	14.1143	91.0645	40.5387
628	95.2056	36.4807	123.967	50.4387	92.6549	39.7672	97.097	54.9826	95.5278	14.1145	91.0878	40.4335
627	95.1542	36.4148	123.969	50.3531	92.5774	39.6703	97.0216	54.8763	95.5211	14.0796	91.0186	40.3655
626	95.1101	36.3272	123.978	50.2779	92.5135	39.5634	96.9455	54.7846	95.4796	14.0752	90.9696	40.3555
625	94.8184	36.266	123.774	50.257	92.4951	39.5207	96.8804	54.7846	95.4256	14.0446	90.9191	40.3775
624	94.65	36.1892	123.685	50.2518	92.5402	39.475	96.7789	54.7316	95.3665	14.0275	90.8514	40.2697
623	94.4916	36.1415	123.763	50.2374	92.4789	39.4062	96.6988	54.6351	95.4951	14.031	90.7933	40.252
622	94.3515	36.0391	123.678	50.1581	92.4484	39.3398	96.7115	54.6215	95.5407	14.0348	90.8424	40.2514
621	94.1716	35.9831	123.554	50.177	92.4561	39.2668	96.5488	54.5479	95.4488	14.0082	90.7337	40.1787
620	94.0799	35.9263	123.449	50.1192	92.4648	39.1983	96.5923	54.4899	95.4211	13.9969	90.6266	40.139
619	93.934	35.8179	123.407	50.0389	92.4287	39.1071	96.6047	54.4169	95.5293	13.9964	90.6622	40.0003
618	93.682	35.7825	123.174	49.9985	92.4644	39.059	96.5414	54.3865	95.4732	13.9733	90.6293	40.02
617	93.6022	35.6842	123.08	49.9316	92.3467	38.9551	96.395	54.3397	95.4636	13.9478	90.465	39.9926
616	93.3304	35.5847	123.108	49.8394	92.2069	38.9202	96.3333	54.3065	95.5488	13.9549	90.4855	39.971
615	93.2787	35.5469	123.062	49.8668	92.2371	38.9084	96.3204	54.215	95.5401	13.953	90.4983	39.8821
614	93.192	35.5035	122.849	49.835	92.2757	38.8229	96.2844	54.2007	95.4782	13.9536	90.3744	39.8624
613	93.0172	35.4073	122.847	49.7913	92.2916	38.7759	96.248	54.1006	95.4911	13.9504	90.283	39.8012
612	92.8739	35.324	122.748	49.6561	92.1863	38.6746	96.2814	54.0968	95.4809	13.9402	90.2168	39.7631
611	92.7417	35.2398	122.727	49.6904	92.2354	38.6515	96.1087	54.0422	95.4955	13.9397	90.1777	39.8288
610	92.6358	35.1957	122.518	49.6621	92.1775	38.6387	96.1909	53.9911	95.425	13.9418	90.0703	39.7801
609	92.5549	35.1154	122.527	49.609	92.1537	38.5457	96.0541	53.912	95.4359	13.94	90.1315	39.7126
608	92.4501	35.0319	122.396	49.5776	92.0861	38.4849	95.9564	53.8902	95.5275	13.9105	90.0401	39.6953
607	92.4259	34.9921	122.274	49.5229	92.1458	38.3499	95.8343	53.8722	95.4532	13.9136	89.9361	39.6733
606	92.3006	34.9706	122.138	49.5189	92.311	38.3618	96.0713	53.8316	95.4537	13.9009	89.8768	39.6518
605	92.2505	34.8783	121.988	49.4849	92.0329	38.3159	95.8132	53.7438	95.5477	13.9223	89.9477	39.6392
604	92.1187	34.8337	121.939	49.3307	92.0415	38.2718	95.7697	53.6688	95.4061	13.909	89.8183	39.5755
603	92.0266	34.7184	121.758	49.3305	92.0575	38.2239	95.7957	53.6359	95.3564	13.9163	89.7205	39.5761
602	92.0137	34.7062	121.634	49.2477	92.1487	38.2152	95.8857	53.6187	95.4701	13.9195	89.6062	39.5359
601	91.8792	34.615	121.418	49.2108	92.0874	38.2315	95.8143	53.5417	95.445	13.9127	89.5848	39.5495
600	91.8867	34.5978	121.311	49.1763	91.9354	38.1591	95.6289	53.5105	95.4827	13.9192	89.5656	39.5596
599	91.8841	34.5557	121.321	49.1256	91.9854	38.1508	95.7591	53.4445	95.3971	13.9118	89.4645	39.5829
598	91.7091	34.5141	120.992	49.1045	91.9353	38.076	95.5878	53.3988	95.3509	13.9249	89.4355	39.5595
597	91.665	34.415	120.968	49.041	91.8761	38.0391	95.5962	53.3577	95.3894	13.9074	89.3381	39.5082
596	91.6521	34.3818	120.792	48.9492	91.9039	38.0642	95.5991	53.2866	95.4188	13.913	89.3438	39.5225
595	91.5547	34.4027	120.482	48.8993	91.9784	37.9609	95.68	53.1936	95.5214	13.9094	89.3927	39.4458
594	91.5661	34.3284	120.49	48.8806	91.904	37.965	95.5902	53.0662	95.6025	13.9278	89.3634	39.4421
593	91.5544	34.3234	120.371	48.8128	91.945	37.9048	95.4914	52.9933	95.5346	13.8969	89.2437	39.4111
592	91.5033	34.2423	120.31	48.6491	91.9715	37.817	95.4683	52.9834	95.5588	13.892	89.211	39.4058
591	91.3969	34.1838	119.979	48.5923	91.9241	37.8257	95.4233	52.8773	95.5981	13.9063	89.2847	39.4157
590	91.3491	34.1355	119.681	48.5047	92.0262	37.7987	95.5044	52.8466	95.5603	13.908	89.1598	39.4434
589	91.3625	34.1699	119.703	48.4976	91.9496	37.7362	95.4168	52.7187	95.5917	13.9146	89.2424	39.3368
588	91.5604	34.0598	119.586	48.3496	92.0038	37.7271	95.3892	52.6187	95.5975	13.912	89.0406	39.3801
587	91.5049	34.0321	119.415	48.3047	91.8758	37.7099	95.3234	52.6105	95.5636	13.9169	89.0738	39.3579
586	91.3597	33.9805	119.114	48.1717	91.891	37.6819	95.2402	52.458	95.6274	13.9229	89.0973	39.369
585	91.416	33.9732	118.9	48.0926	91.9068	37.617	95.164	52.3689	95.6411	13.9053	89.0521	39.2643
584	91.3449	33.9442	118.833	48.0126	91.7865	37.555	95.1648	52.2166	95.6508	13.8808	88.9401	39.2191
583	91.3202	33.9291	118.415	47.8783	91.7952	37.5799	95.119	52.1871	95.6804	13.9175	88.9753	39.2602
582	91.49	33.9141	118.439	47.8783	91.8586	37.6119	95.1856	52.1864	95.6533	13.9329	88.869	39.2007
581	91.4855	33.8582	118.362	47.7929	91.8054	37.5627	95.1914	51.9847	95.6718	13.9169	88.8915	39.2395
580	91.4814	33.8029	118.216	47.6118	91.6731	37.5092	95.0705	51.9371	95.7725	13.9204	88.8625	39.1742
579	91.4921	33.8255	117.806	47.5402	91.7475	37.4876	95.1209	51.8511	95.7049	13.9149	88.8548	39.2014
578	91.5359	33.8145	117.524	47.4332	91.8306	37.518	95.1707	51.8026	95.7226	13.9193	88.8337	39.1509
577	91.5236	33.7883	117.568	47.2934	91.7558	37.4956	95.0095	51.6161	95.8197	13.9423	88.7592	39.0668
576	91.6409	33.7876	117.275	47.3008	91.8075	37.4153	95.0214	51.5625	95.6782	13.9492	88.7021	39.1459
575	91.6288	33.8279	117.089	47.1422	91.7326	37.429	94.8916	51.4272	95.6798	13.9528	88.6846	39.063
574	91.7369	33.7453	116.93	46.9528	91.6944	37.3959	94.9227	51.3579	95.7051	13.9244	88.6063	39.0786
573	91.8797	33.7788	116.854	46.9416	91.5678	37.4661	94.7837	51.2256	95.7393	13.9302	88.6642	39.104
572	91.6672	33.7091	116.397	46.8706	91.6786	37.4368	94.8348	51.1505	95.8352	13.9546	88.635	39.0228
571	91.7486	33.6674	116.138	46.7	91.6271	37.3349	94.809	50.9977	95.6571	13.9486	88.3984	39.0306
570	91.8393	33.7257	116.147	46.5888	91.5108	37.3357	94.6892	50.964	95.6761	13.9308	88.405	39.023
569	91.7868	33.6374	115.816	46.4459	91.5953	37.4507	94.7426	50.9351	95.7747	13.9702	88.3751	38.9192
568	91.7927	33.657	115.647	46.3467	91.5998	37.4534	94.6857	50.7412	95.7716	13.9965	88.3751	38.9347
567	92.0975	33.6061	115.658	46.2183	91.4517	37.3983	94.5953	50.7222	95.789	13.9951	88.2904	38.8519
566	92.0746	33.6241	115.394	46.1117	91.4723	37.4236	94.565	50.6675	95.8349	14.0356	88.4054	38.8651
565	92.1136	33.6139	114.911	45.9857	91.4464	37.3064	94.4651	50.5028	95.7542	14.0173	88.2619	38.8691
564	92.1776	33.6097	114.818	45.9034	91.56	37.3072	94.445	50.2846	95.909	14.0327	88.2379	38.8344
563	92.11	33.58	114.591	45.6569	91.3388	37.247	94.4645	50.2203	95.8497	14.0617	88.2564	38.7698
562	92.2951	33.5724	114.549	45.5864	91.2095	37.2784	94.2656	50.1471	95.7044	14.0186	88.1206	38.7244
561	92.2247	33.5986	114.274	45.5172	91.0994	37.2942	94.2935	50.0512	95.7538	14.0151	88.0721	38.735
560	92.4337	33.5359	114.184	45.4718	91.16	37.2369	94.2307	49.9317	95.6538	14.0199	87.9788	38.6889
559	92.435	33.5467	114.035	45.2478	91.504	37.308	94.3387	49.8689	95.6865	14.0405	87.9534	38.6569
558	92.6237	33.5063	113.881	45.1018	91.2873	37.2725	94.3191	49.6565	95.7113	14.0438	87.8863	38.6909
557	92.5474	33.5336	113.593	45.1014	91.1484	37.258	94.1206	49.6473	95.6871	14.0369	87.8233	38.7066
556	92.7107	33.5599	113.449	44.9739	91.1247	37.274	94.11	49.5048	95.714	14.0586	87.8218	38.6452
555	92.6617	33.5545	113.29	44.8239	91.1515	37.3466	94.1149	49.5052	95.7513	14.0947	87.8523	38.7231
554	92.7944	33.5146	113.183	44.6153	91.1579	37.3535	94.254	49.5351	95.6787	14.0845	87.7538	38.6035
553	92.7852	33.5687	112.735	44.5969	91.1779	37.3082	94.0973	49.3738	95.7899	14.0817	87.7009	38.515
552	92.8236	33.5199	112.81	44.5085	91.2234	37.2967	94.0528	49.2743	95.5654	14.086	87.5685	38.5929
551	93.0672	33.5705	112.948	44.3914	91.0586	37.3015	93.8842	49.1626	95.6561	14.0999	87.4417	38.5278
550	92.9411	33.5192	112.463	44.281	90.9475	37.26	93.7291	49.0451	95.6761	14.1241	87.4539	38.4691
549	93.025	33.5252	112.542	44.1886	91.0226	37.2553	93.9355	49.0011	95.6385	14.1124	87.3831	38.475
548	93.1404	33.5695	112.402	44.0841	90.9656	37.2915	93.7638	48.9549	95.6069	14.1233	87.3783	38.4352
547	93.1076	33.5545	112.28	43.959	91.0337	37.3138	93.7642	48.8926	95.7087	14.1554	87.4276	38.4309
546	93.2943	33.6105	112.195	43.8552	90.916	37.2594	93.8363	48.7694	95.6681	14.134	87.2689	38.3673
545	93.19	33.5848	111.985	43.7582	90.9161	37.2625	93.6875	48.6309	95.6148	14.1553	87.2793	38.3787
544	93.3518	33.5036	112.134	43.6486	90.7723	37.2578	93.4441	48.6002	95.6924	14.1758	87.3179	38.3139
543	93.2051	33.5716	111.819	43.5765	90.6115	37.1962	93.4716	48.4764	95.6272	14.1853	87.3149	38.2624
542	93.3637	33.5264	111.91	43.547	90.8146	37.2553	93.5377	48.4126	95.6082	14.1747	87.0596	38.3132
541	93.3836	33.5943	111.788	43.3868	90.8921	37.2439	93.6043	48.3128	95.6369	14.1958	87.1011	38.2528
540	93.2836	33.6433	111.454	43.361	90.7812	37.1985	93.5437	48.214	95.6263	14.2151	87.107	38.2544
539	93.3412	33.629	111.397	43.254	90.6632	37.2161	93.3618	48.2138	95.5727	14.2182	87.0077	38.2038
538	93.5493	33.6261	111.556	43.1578	90.6253	37.2471	93.308	48.2553	95.5992	14.2298	87.0393	38.1596
537	93.7063	33.6504	111.597	43.0631	90.6503	37.2568	93.2863	48.0921	95.6031	14.2557	86.9391	38.13
536	93.6478	33.5845	111.238	43.0337	90.5983	37.1871	93.1865	48.0606	95.6551	14.259	86.8878	38.161
535	93.715	33.5997	111.379	42.9816	90.652	37.1665	93.3844	48.0278	95.488	14.2666	86.8115	38.2117
534	93.5938	33.6576	111.245	42.9027	90.543	37.154	93.1438	47.9739	95.5821	14.2763	86.8897	38.1042
533	93.6534	33.6292	111.275	42.7559	90.5652	37.2437	93.1325	47.9275	95.5595	14.2607	86.9037	38.113
532	93.821	33.6681	111.322	42.7997	90.3884	37.1493	93.0358	47.8548	95.5042	14.299	86.7689	38.0976
531	93.7546	33.6289	111.28	42.7055	90.3107	37.1952	92.8696	47.86	95.4405	14.2762	86.6987	38.0497
530	93.881	33.6946	111.228	42.7095	90.3619	37.1623	92.8161	47.7886	95.5944	14.2853	86.7016	38.0459
529	93.807	33.7027	111.07	42.6067	90.4384	37.2248	92.9293	47.8192	95.4979	14.3005	86.5842	37.9192
528	93.6774	33.6855	111.175	42.5112	90.3729	37.1548	92.9085	47.6912	95.5218	14.3088	86.5692	37.9785
527	93.7496	33.7152	111.026	42.4945	90.2539	37.1598	92.7662	47.7243	95.4959	14.3177	86.5598	38.0186
526	93.8067	33.7294	111.112	42.3904	90.3066	37.1736	92.9424	47.6624	95.4857	14.3245	86.4913	37.9491
525	93.7838	33.6577	110.983	42.4046	90.1834	37.1228	92.748	47.5807	95.5079	14.328	86.5634	37.8857
524	93.8724	33.7224	111.009	42.3486	90.2011	37.1534	92.6651	47.5906	95.4091	14.3265	86.3775	37.9521
523	93.9546	33.7113	111.18	42.3694	90.0571	37.17	92.7039	47.5978	95.5382	14.3335	86.473	37.8972
522	93.9291	33.7114	111.091	42.3038	90.0952	37.1166	92.595	47.5192	95.3877	14.326	86.4043	37.8209
521	93.8782	33.7499	111.177	42.2518	89.9432	37.1463	92.4174	47.5388	95.462	14.3695	86.2849	37.8387
520	93.8967	33.7001	111.124	42.1713	90.0721	37.1056	92.5592	47.5084	95.5346	14.3265	86.393	37.8433
519	93.8843	33.6958	111.196	42.1086	89.9513	37.1098	92.4029	47.5283	95.4145	14.3221	86.3404	37.7757
518	93.8892	33.7272	111.133	42.1056	89.9562	37.0889	92.4218	47.4342	95.4505	14.3617	86.3207	37.7725
517	93.9436	33.758	111.146	41.9899	89.9143	37.1568	92.3346	47.508	95.3887	14.3267	86.2304	37.7869
516	93.9993	33.7941	111.148	42.0454	89.8361	37.0805	92.2966	47.4257	95.1912	14.3515	86.137	37.7786
515	93.8919	33.755	111.224	42.0395	89.7449	37.0908	92.3083	47.3982	95.3171	14.3516	86.3017	37.7942
514	93.8766	33.8774	111.196	42.1233	89.754	37.1013	92.3142	47.4072	95.2807	14.3591	86.1452	37.7831
513	93.8239	33.8151	111.293	42.0212	89.6938	37.0867	92.0502	47.4301	95.326	14.3689	86.1602	37.7589
512	93.9129	33.7866	111.23	41.9339	89.5235	37.0656	92.0602	47.39	95.4292	14.3921	86.075	37.6384
511	93.9473	33.8163	111.375	41.9655	89.5297	37.0779	92.0031	47.3453	95.3181	14.3979	86.1437	37.6584
510	93.8412	33.7992	111.425	41.9519	89.5407	37.0879	92.0948	47.4177	95.2855	14.3907	86.0924	37.6366
509	93.8597	33.8365	111.418	41.9418	89.4073	37.1209	91.8744	47.3981	95.3362	14.402	86.13	37.6087
508	93.817	33.891	111.315	41.9064	89.3643	37.0927	91.8059	47.3466	95.2829	14.3982	86.0164	37.6078
507	93.8768	33.8584	111.371	41.9491	89.3674	37.0732	91.8469	47.2917	95.2373	14.402	85.9893	37.603
506	93.9758	33.8292	111.597	41.9361	89.2906	37.018	91.8411	47.3467	95.3055	14.4337	86.0082	37.6093
505	93.8949	33.863	111.612	41.9499	89.1755	36.9648	91.6941	47.2817	95.2295	14.4124	85.9562	37.6039
504	93.8072	33.874	111.545	41.8577	89.3592	36.9959	91.6789	47.2682	95.2737	14.3923	86.0152	37.4786
503	93.6866	33.8886	111.468	41.8839	89.1393	37.0171	91.5798	47.3209	95.2212	14.402	86.0103	37.549
502	93.8787	33.8759	111.537	41.8272	89.1031	36.9145	91.4353	47.2453	95.234	14.4008	85.9856	37.4655
501	93.9149	33.9237	111.718	41.8926	89.0387	36.9683	91.4499	47.2955	95.2128	14.359	85.8615	37.4809
500	93.6932	33.8859	111.494	41.8504	88.9736	36.9949	91.4191	47.274	95.178	14.3774	85.9223	37.4829
499	93.7751	33.8646	111.818	41.9311	88.847	36.9418	91.2109	47.2405	95.2954	14.4172	86.1292	37.4688
498	93.8677	33.8599	111.652	41.8876	88.8129	36.9051	91.149	47.2296	95.2909	14.3888	86.0416	37.4712
497	93.8909	33.8861	111.894	41.9153	88.642	36.9515	91.0095	47.2183	95.2235	14.3909	85.8512	37.4408
496	93.8278	33.9279	111.916	41.8694	88.7582	36.8834	91.2286	47.2473	95.184	14.3732	85.8574	37.4069
495	93.6188	33.8961	111.769	41.8985	88.876	36.8868	91.1195	47.295	95.2646	14.3722	85.869	37.4129
494	93.7427	33.9224	111.72	41.98	88.6293	36.9025	90.929	47.2043	95.2253	14.373	85.9087	37.336
493	93.6886	33.9422	111.873	41.9602	88.593	36.8527	90.851	47.2308	95.1731	14.3426	85.8135	37.3559
492	93.7901	33.9657	112.036	41.9322	88.6685	36.7688	90.9421	47.2706	95.0847	14.346	85.9268	37.3846
491	93.6955	33.9584	112.081	41.9159	88.5028	36.8469	90.7352	47.3019	95.2417	14.363	85.8803	37.3256
490	93.746	33.8909	112.026	41.9279	88.4205	36.7645	90.7121	47.1982	95.1734	14.3279	85.8899	37.3618
489	93.7551	33.9471	112.187	41.9472	88.3421	36.8713	90.5807	47.2807	95.1034	14.3058	85.7778	37.3023
488	93.7609	33.9286	112.111	41.9502	88.4384	36.8098	90.6413	47.1748	95.1168	14.3154	85.8204	37.3303
487	93.6562	33.9833	111.965	42.0328	88.264	36.834	90.4322	47.2205	95.1741	14.3095	85.8765	37.2971
486	93.6323	34.0294	112.13	42.1061	88.2807	36.7662	90.5373	47.2764	95.0466	14.2797	85.7213	37.326
485	93.7213	33.9703	112.212	42.0502	88.2749	36.8125	90.3358	47.2917	95.1494	14.2927	85.9187	37.2376
484	93.6064	33.977	112.193	42.0436	88.0528	36.7562	90.1798	47.3014	95.1344	14.2894	86.0009	37.2006
483	93.7997	33.9536	112.412	42.0733	87.9714	36.7165	90.1278	47.2386	95.0417	14.2452	85.8292	37.2314
482	93.6802	34.0463	112.294	42.0641	87.9303	36.6984	90.0589	47.2124	95.0883	14.2293	85.9076	37.1251
481	93.5765	33.9735	112.133	42.1401	88.0559	36.7392	90.1365	47.2123	95.1203	14.2139	85.8888	37.1196
480	93.6283	33.9718	112.225	42.143	87.848	36.7506	89.8831	47.2846	95.0865	14.1935	85.8367	37.1394
479	93.7847	34.0345	112.436	42.1576	87.8392	36.6375	89.9667	47.1489	95.1138	14.1858	85.8643	37.1132
478	93.6529	33.9883	112.372	42.1944	87.7089	36.62	90.0055	47.1762	95.0427	14.1563	85.8127	37.1123
477	93.7461	34.0125	112.369	42.2436	87.668	36.6382	89.876	47.2394	94.9443	14.1405	85.8582	37.0818
476	93.7015	34.0009	112.487	42.2602	87.72	36.5355	89.8625	47.1777	94.9706	14.1407	85.9601	37.0822
475	93.7551	33.9636	112.373	42.1433	87.5939	36.6526	89.7526	47.1817	94.9394	14.0812	85.7995	37.1134
474	93.8636	34.0041	112.634	42.3122	87.6543	36.6304	89.7207	47.2553	94.8994	14.0552	85.8284	37.0665
473	93.8885	34.0361	112.596	42.3908	87.5677	36.545	89.7045	47.2078	94.9081	14.0305	85.8054	37.0874
472	93.6747	33.9989	112.632	42.3532	87.4416	36.5242	89.5563	47.1384	94.8883	14.0453	85.8626	37.0506
471	93.7891	34.0272	112.64	42.4092	87.2937	36.5448	89.5019	47.2423	94.9258	13.9673	85.8677	36.9966
470	93.7972	34.0382	112.752	42.4578	87.3925	36.4873	89.4234	47.1927	94.8177	13.9347	85.9276	36.9306
469	93.7979	33.9746	112.6	42.5028	87.2834	36.5384	89.4395	47.2616	94.8528	13.961	85.9861	36.9545
468	93.7193	34.0446	112.658	42.5014	87.175	36.5085	89.4184	47.2003	94.7776	13.9138	85.9752	36.9095
467	93.8169	34.0176	112.735	42.5119	87.1447	36.4445	89.1807	47.1334	94.8621	13.887	85.9211	36.9073
466	93.7101	34.0568	112.508	42.5111	87.1244	36.3913	89.2256	47.1457	94.6605	13.8312	85.895	36.907
465	93.8659	34.0456	112.762	42.5356	87.116	36.3629	89.1682	47.2005	94.6135	13.7976	85.9202	36.9006
464	94.011	34.0709	112.717	42.6768	86.8635	36.3629	89.1739	47.1582	94.7395	13.7779	85.9484	36.8865
463	93.816	34.0856	112.68	42.6833	86.933	36.2862	89.0506	47.1405	94.5552	13.7312	85.8878	36.8035
462	93.9173	34.0277	112.78	42.7429	86.8877	36.3266	89.0672	47.1948	94.5014	13.7139	85.958	36.8394
461	94.094	34.0377	112.937	42.6791	86.8193	36.2718	89.1546	47.0631	94.5952	13.6701	85.9543	36.7989
460	94.0576	34.0594	112.995	42.7101	86.9305	36.2452	89.1498	47.1484	94.551	13.6285	86.0284	36.8527
459	94.0799	34.0852	112.975	42.873	86.6525	36.2482	88.9541	47.0369	94.4135	13.5684	86.0124	36.8131
458	94.0605	34.1007	113.073	42.8165	86.7659	36.1334	88.8982	47.0617	94.313	13.5242	86.0032	36.7798
457	94.0664	34.0978	112.85	42.921	86.6107	36.151	88.8041	47.0252	94.4967	13.5104	86.1714	36.7542
456	94.1695	34.0695	113.013	42.9452	86.584	36.0654	88.7346	46.9898	94.2761	13.4611	85.9003	36.8067
455	94.3029	34.0452	113.185	42.9228	86.3925	36.06	88.7646	47.0745	94.2523	13.4325	86.0526	36.7873
454	94.0376	34.111	113.016	43.0171	86.4716	36.0254	88.9024	46.9694	94.2254	13.3612	86.0755	36.7832
453	94.1027	34.0547	113.003	42.998	86.4107	35.9631	88.7654	47.0035	94.1278	13.3321	86.1006	36.7159
452	94.3123	34.0951	113.156	43.1052	86.3795	35.9036	88.6825	46.9602	94.0801	13.2669	86.013	36.664
451	94.2746	34.1529	113.167	43.1895	86.4211	35.8835	88.6475	46.9864	94.0928	13.2384	86.1491	36.6514
450	94.2689	34.1009	113.041	43.1883	86.3182	35.8297	88.6403	46.9627	93.8902	13.1917	86.1132	36.6678
449	94.3718	34.103	113.255	43.2728	86.2791	35.7085	88.6288	46.8023	93.7432	13.1444	86.0574	36.6683
448	94.2975	34.0528	113.185	43.2726	86.2612	35.7414	88.6444	46.7888	93.7978	13.096	86.1943	36.6827
447	94.4755	34.1213	113.311	43.2809	86.2277	35.6611	88.5675	46.7752	93.6119	13.0371	86.0813	36.628
446	94.4202	34.0805	113.461	43.3327	86.0889	35.6306	88.5188	46.7818	93.6266	12.9961	86.2782	36.5939
445	94.4887	34.1743	113.368	43.4446	85.9873	35.5228	88.5769	46.657	93.4384	12.9463	86.0918	36.625
444	94.5942	34.062	113.383	43.4358	85.9373	35.4713	88.3741	46.6652	93.3325	12.9221	86.082	36.5936
443	94.5413	34.0973	113.512	43.4538	86.0291	35.4202	88.4794	46.5948	93.1357	12.8233	86.0352	36.6285
442	94.4827	34.0976	113.418	43.5217	85.8666	35.3252	88.3169	46.4794	93.0818	12.7757	86.0937	36.4774
441	94.618	34.159	113.382	43.5935	85.9295	35.288	88.4372	46.4522	92.9875	12.7291	86.2454	36.5752
440	94.5875	34.2039	113.605	43.7158	85.8165	35.2364	88.2921	46.4236	92.8416	12.6671	86.1527	36.6342
439	94.6869	34.0909	113.602	43.673	85.8049	35.1675	88.525	46.3795	92.783	12.6227	86.1418	36.5698
438	94.8416	34.2025	113.535	43.7434	85.8171	35.1038	88.3485	46.3427	92.5961	12.5629	86.3267	36.5013
437	94.8216	34.1807	113.663	43.7791	85.7513	35.0427	88.3524	46.2783	92.4965	12.5219	86.2585	36.564
436	94.811	34.1275	113.652	43.8176	85.5725	34.8978	88.2289	46.1321	92.4012	12.4579	86.2528	36.5099
435	94.8392	34.09	113.859	43.7639	85.6236	34.8389	88.3682	46.0206	92.2838	12.3868	86.2553	36.5774
434	94.85	34.0458	113.74	43.905	85.6339	34.785	88.4531	46.0161	92.2008	12.3451	86.2908	36.5176
433	94.7796	33.9872	113.896	43.8746	85.5207	34.69	88.3921	45.9523	92.1563	12.29	86.2586	36.5048
432	94.9528	34.0377	113.672	43.8999	85.5909	34.5899	88.3834	45.789	91.8781	12.2238	86.3209	36.4913
431	95.0013	34.0621	113.701	43.9713	85.546	34.4969	88.4338	45.7985	91.7365	12.1526	86.2265	36.5412
430	95.0243	34.1065	113.725	44.0237	85.5397	34.4182	88.4009	45.5726	91.5704	12.0986	86.1971	36.4264
429	94.9509	34.094	114.052	44.2122	85.4823	34.3368	88.3619	45.5956	91.3489	12.0214	86.123	36.3958
428	95.0776	34.0565	113.969	44.0581	85.4309	34.1784	88.2401	45.3596	91.1652	11.9886	86.185	36.3926
427	95.0554	34.0562	113.902	44.2042	85.3325	34.0269	88.3907	45.3629	91.1952	11.8791	86.3325	36.406
426	95.0423	34.0389	113.882	44.1949	85.2315	34.0002	88.2135	45.2596	90.8713	11.8492	86.291	36.4849
425	95.0612	34.0303	113.982	44.2316	85.1789	33.848	88.3229	45.1206	90.7335	11.7837	86.2294	36.395
424	94.9289	34.0052	113.838	44.3559	85.1978	33.6952	88.1852	44.9176	90.4661	11.7137	86.4342	36.422
423	95.0006	33.9765	113.759	44.2556	85.1606	33.6414	88.3048	44.9141	90.2802	11.616	86.2343	36.4494
422	95.0594	33.984	114.044	44.4592	85.0978	33.506	88.2178	44.7506	90.2768	11.5901	86.454	36.425
421	95.165	33.8949	114.092	44.3383	85.2998	33.4242	88.3483	44.5583	90.0182	11.5091	86.416	36.4523
420	95.0806	33.9516	113.925	44.423	85.2176	33.2566	88.3937	44.4461	89.6919	11.4084	86.2656	36.467
419	95.32	33.9926	114.06	44.472	84.9876	33.0545	88.146	44.3175	89.3711	11.3103	86.1907	36.3132
418	95.1823	33.9206	113.961	44.5569	84.8902	32.9142	88.0704	44.1142	89.3018	11.2526	86.2939	36.3605
417	95.2391	33.9476	114.162	44.4191	84.8605	32.7842	88.1191	43.9981	88.9097	11.205	86.3541	36.3574
416	95.0368	33.8632	113.99	44.4533	84.7675	32.6282	88.236	43.8032	88.5192	11.1194	86.3883	36.2922
415	95.3219	33.9114	113.985	44.5341	84.9046	32.4827	88.2027	43.6706	88.2078	11.0348	86.3618	36.2936
414	95.4116	33.8255	114.04	44.5225	84.6993	32.3686	88.2295	43.5113	87.6783	10.9699	86.2142	36.2779
413	95.1525	33.79	113.812	44.5125	84.6793	32.0753	88.0702	43.3021	87.251	10.9192	86.2659	36.2472
412	95.015	33.8059	113.732	44.6422	84.5977	31.9634	88.1718	42.9879	86.8023	10.835	86.2229	36.2712
411	95.0962	33.6779	113.959	44.4957	84.5135	31.7524	88.1761	42.8649	85.8689	10.7468	86.247	36.2048
410	95.4628	33.7487	114.127	44.694	84.5455	31.5929	88.2452	42.6283	85.3922	10.6724	86.2326	36.2832
409	95.0494	33.6421	113.914	44.592	84.5055	31.4104	88.2772	42.4989	84.6616	10.6286	86.1367	36.2069
408	95.2094	33.5952	113.904	44.5332	84.528	31.2775	88.3403	42.3645	83.6725	10.5425	86.2515	36.1669
407	95.0335	33.5317	114.049	44.5514	84.3042	31.0751	88.015	42.1023	82.4444	10.4147	86.092	36.1818
406	95.2132	33.6159	113.841	44.6464	84.2619	30.8493	88.0588	41.782	81.1515	10.3603	86.0513	36.2811
405	95.0352	33.5259	113.774	44.6251	84.3393	30.7649	88.1525	41.5163	79.8838	10.3073	86.1056	36.2082
404	95.1004	33.3129	113.623	44.738	83.948	30.4877	87.9576	41.378	78.2337	10.2547	85.9706	36.1374
403	95.0307	33.4809	113.463	44.6516	83.8358	30.2816	87.797	41.1791	76.4784	10.1338	85.8714	36.0718
402	95.2128	33.3866	114.033	44.6365	84.0208	30.1173	87.9607	41.0499	74.4215	10.0594	85.6335	36.1677
401	94.9469	33.429	113.713	44.6593	84.0287	29.9092	87.9017	40.7471	72.2028	10.0049	85.463	36.0709
400	94.8138	33.3238	113.684	44.7457	83.7343	29.6853	88.0722	40.5524	69.7922	9.94505	85.2683	35.9654
399	94.9404	33.2328	113.348	44.6432	83.8229	29.5568	87.8957	40.4067	66.9311	9.82368	84.6921	36.0556
398	94.9286	33.2285	113.263	44.716	83.6791	29.3242	87.9441	40.1467	64.4532	9.74107	84.4439	36.1741
397	94.8782	33.0391	113.606	44.7089	83.6061	29.1838	87.6108	39.8934	61.3806	9.66864	83.8765	36.0481
396	94.8191	33.0929	113.456	44.7113	83.5897	28.9706	87.8009	39.6279	58.2343	9.5733	83.2795	35.9196
395	94.8675	33.1066	113.47	44.8081	83.7918	28.6943	88.0637	39.3514	55.145	9.5098	82.4804	35.9801
394	94.6209	32.9199	113.47	44.6542	83.2337	28.5404	87.5806	39.2232	52.0079	9.42177	81.6079	35.9491
393	95.0028	32.9488	113.326	44.6033	83.394	28.3561	87.6859	38.9362	48.8083	9.34763	80.5031	35.9735
392	94.719	32.7882	113.089	44.5796	83.218	28.0453	87.629	38.611	45.6028	9.28826	79.1565	35.9433
391	94.4054	32.7783	113.098	44.5542	83.1335	27.8768	87.3747	38.5446	42.5967	9.17721	77.6597	35.8451
390	94.6219	32.7016	113.222	44.4517	82.9723	27.5733	87.1736	38.2304	39.4163	9.01664	75.8116	35.8907
389	94.5835	32.6753	113.18	44.4906	83.0193	27.4346	87.1805	38.0401	36.6292	8.99404	73.8935	35.7876
388	94.6269	32.5769	113.042	44.4282	82.7495	27.1268	86.8648	37.7148	33.8199	8.85824	71.3118	35.8855
387	94.7993	32.5696	113.192	44.4453	82.4955	27.0513	86.6014	37.5778	31.2667	8.77491	68.9424	35.86
386	94.427	32.4905	112.865	44.515	82.4808	26.8081	86.494	37.2061	28.7103	8.67078	65.9197	35.9128
385	94.3965	32.4119	112.932	44.4264	82.3985	26.5774	85.9164	36.9502	26.3693	8.5694	62.9939	35.7771
384	94.2627	32.3478	112.82	44.4959	82.4497	26.2993	85.6223	36.7406	24.1078	8.38832	59.5617	35.7615
383	94.2301	32.2567	112.727	44.3471	81.9876	26.2741	84.9847	36.496	22.0411	8.26331	56.0027	35.8564
382	94.3619	32.2281	112.98	44.272	81.6855	26.0273	84.2543	36.1817	20.1755	8.1349	52.4758	35.7946
381	94.1706	32.1255	112.91	44.3014	81.3968	25.7485	83.3953	35.8958	18.4724	7.98206	48.7214	35.8355
380	93.9424	31.8992	112.621	44.0876	81.0068	25.5629	82.2645	35.6397	16.9248	7.87004	44.9823	35.7888
379	93.9702	31.8792	112.708	44.2481	80.7576	25.3073	80.9291	35.2031	15.5417	7.6493	41.4039	35.8171
378	94.0115	31.807	113.006	44.0602	80.1412	25.0795	79.5314	34.9981	14.2433	7.48661	38.0176	35.803
377	94.1637	31.8394	113.214	44.2185	79.4727	24.8392	77.6771	34.6027	13.154	7.37657	34.7745	35.8781
376	94.038	31.6694	113.019	44.0493	79.1303	24.6815	76.0307	34.368	12.2501	7.23832	31.6882	35.836
375	93.967	31.5584	113.129	43.9115	78.04	24.508	73.7921	34.0576	11.4019	7.03523	28.8313	35.8415
374	93.7045	31.6551	112.718	43.869	77.3265	24.2896	71.5131	33.535	10.6738	6.94243	26.1925	35.8568
373	93.9416	31.5288	113.049	43.9019	76.0108	23.9708	68.8199	33.1255	9.95867	6.79246	23.6017	35.7613
372	93.5231	31.2713	112.935	44.0306	74.8951	23.8393	66.1246	32.5921	9.48871	6.69726	21.1615	35.8674
371	93.5078	31.3437	112.61	43.8677	73.6841	23.6007	63.1944	32.1657	8.97176	6.59323	19.0777	35.8056
370	93.4234	31.1665	112.9	43.7469	72.1289	23.2511	60.4028	31.4721	8.55848	6.37403	17.097	35.8093
369	93.2587	31.0219	112.818	43.6107	70.4235	22.925	57.3608	30.904	8.19023	6.32499	15.2654	35.7764
368	93.2504	31.0528	112.745	43.484	68.6611	22.6589	54.369	30.2203	7.83806	6.23335	13.6609	35.6962
367	93.051	31.0342	113.025	43.6345	66.5627	22.4325	51.3377	29.5384	7.53385	6.12423	12.3107	35.8796
366	93.1373	30.7243	112.691	43.4457	64.3303	22.1138	48.5709	28.8761	7.29666	6.05469	11.2191	35.8395
365	93.0873	30.7671	113.077	43.3807	62.1882	21.6103	45.7339	28.1355	7.02097	5.94636	10.1993	35.8548
364	92.6756	30.5904	112.559	43.3059	59.7785	21.3083	43.1272	27.3967	6.82629	5.88017	9.43488	35.8867
363	92.7416	30.4884	113.208	43.2266	57.1167	20.9763	40.7587	26.6565	6.57873	5.76952	8.82522	35.869
362	92.5134	30.3654	112.936	43.0586	54.3695	20.5649	38.2746	26.0245	6.43855	5.74524	8.26964	35.9229
361	92.4318	30.374	113.292	43.1518	51.4808	19.9884	35.8445	25.2468	6.3049	5.64998	7.85145	35.9473
360	92.0974	30.1747	112.78	43.088	48.7556	19.3917	34.0951	24.431	6.10948	5.5541	7.47335	36.021
359	91.9117	29.8708	113.2	42.9536	45.8907	18.9555	32.1414	23.9643	6.02367	5.61788	7.25234	35.8215
358	91.8569	29.9008	113.067	42.7877	42.9533	18.2563	30.4134	23.3189	5.86543	5.46472	6.93306	35.8824
357	91.941	29.7946	113.308	42.6954	40.3454	17.7767	28.9567	22.5638	5.81646	5.4633	6.66361	36.0563
356	91.6633	29.7158	112.757	42.482	37.5597	17.064	27.506	22.1308	5.73483	5.39967	6.46355	36.0169
355	91.3306	29.4247	112.882	42.2939	34.969	16.3292	26.275	21.477	5.64902	5.41307	6.33065	35.9977
354	91.2841	29.5052	112.901	42.3045	32.3734	15.5115	25.0609	20.9137	5.56875	5.3562	6.07657	36.14
353	91.4171	29.4799	113.427	42.154	29.7774	15.0599	23.8187	20.4809	5.47012	5.28181	5.97388	36.002
352	91.1799	29.2195	113.61	42.1715	27.6791	14.3498	22.9304	20.0409	5.54845	5.35617	5.71306	36.0484
351	90.5729	29.0011	113.054	41.9136	25.456	13.7622	21.8403	19.5776	5.46246	5.2693	5.62922	35.8637
350	90.2051	29.0161	113.083	41.8039	23.6063	13.0089	20.9	19.161	5.44761	5.28113	5.4657	36.1255
349	89.0098	27.3236	106.946	40.8312	20.1906	11.5395	19.1582	18.2589	5.36607	5.17708	5.23011	35.5106
348	88.3634	26.8387	106.881	41.0751	18.5668	10.834	18.678	17.2831	5.39021	4.86929	5.0717	34.4569
347	87.4717	27.0655	106.395	40.677	17.3972	10.4263	17.6433	17.3875	5.0248	4.88723	4.95945	34.8029
346	88.2258	27.0771	107.124	40.3084	15.7677	9.79411	17.0639	16.6627	5.41809	4.9663	5.05796	35.0469
345	87.5941	26.4654	106.641	40.3848	14.5164	9.03651	16.3954	16.1073	5.19806	4.85396	5.06523	34.8747
344	87.0644	26.2294	107.279	39.9252	13.8626	8.77382	15.9264	16.2217	5.20309	5.18055	4.79034	34.9823
343	86.5826	26.3906	106.621	39.9811	12.6375	8.50069	14.8739	15.7201	4.99008	4.90017	4.56856	34.2648
342	87.1335	26.2111	106.77	39.7871	11.8024	8.24536	15.0777	15.6686	5.11115	5.02401	4.66082	34.5497
341	86.2865	26.0489	106.991	39.3361	11.303	7.94369	14.0473	15.0778	5.16338	5.16964	4.6654	34.495
340	87.0924	25.6586	106.744	39.2031	10.5548	7.37227	13.9529	14.7594	5.31857	5.03133	4.32717	34.9484
339	86.3808	25.6342	106.003	39.1135	10.0974	7.07908	13.2059	14.8113	5.37389	5.11137	4.54341	34.6259
338	85.8689	25.4756	106.679	38.9689	9.47045	6.50953	12.7313	14.3066	5.30897	5.0482	4.36671	34.8109
337	85.2173	25.456	105.751	39.0524	8.97333	6.59196	12.1098	14.0675	5.34408	5.10139	4.38375	34.4222
336	85.018	25.2523	104.953	38.2546	8.62546	6.30822	11.9713	13.5505	5.23707	5.16602	4.25229	34.6357
335	84.8695	25.2355	105.881	38.1615	8.57655	5.83523	11.4264	13.4164	5.18515	5.26854	4.3022	34.7623
334	84.062	25.3195	105.394	38.028	7.78153	5.91938	10.7908	13.4216	5.32872	5.14342	4.17072	35.3223
333	84.2064	25.0572	105.513	37.8098	7.80126	5.53796	10.8327	13.0015	5.34153	5.08755	4.32983	35.0006
332	83.7175	24.5454	105.552	37.6467	7.32232	5.37798	10.4105	12.7783	5.43147	5.38059	4.23163	35.1539
331	82.594	24.6434	105.127	37.8391	7.08315	5.43102	10.0765	12.5285	5.54659	5.25455	4.07919	35.114
330	82.4326	24.4601	103.894	37.0203	6.73007	5.29142	9.78472	12.5248	5.55897	5.25469	3.97591	35.07
329	81.9995	24.2943	104.319	37.1307	7.02848	4.92955	9.36885	12.4593	5.60611	5.30639	4.16605	35.0559
328	81.6359	24.1205	104.316	36.9365	6.45391	5.16748	9.08415	12.4298	5.66937	5.21749	4.1881	35.1741
327	80.738	23.734	104.165	36.3222	6.46214	4.83443	8.77103	11.9359	5.72133	5.12038	4.20678	34.8744
326	80.9059	23.7585	103.727	36.0153	6.06595	4.83223	8.59423	11.5974	5.56513	5.22922	4.20824	35.0888
325	80.3512	23.7524	103.54	35.9029	6.27471	4.65133	8.3013	11.6024	5.72593	5.5252	4.15205	35.0831
324	79.2542	23.4695	103.486	35.666	6.06184	4.61263	8.23537	11.0827	5.70695	5.33753	4.24163	35.3332
323	78.6258	23.2617	103.055	35.5052	6.00947	4.55628	7.93047	11.3005	5.64792	5.45696	4.26821	35.4654
322	78.3204	23.3143	102.598	35.4348	5.98563	4.4121	7.75391	11.1293	5.76536	5.51146	4.18648	35.4171
321	77.1041	22.9638	102.188	34.8827	5.76713	4.6965	7.46735	10.9951	5.75652	5.4386	4.16688	35.4766
320	76.8903	22.9278	103.066	34.7283	5.84055	4.33091	7.56017	10.7694	5.75815	5.40661	4.28086	35.378
319	75.3665	22.3723	101.584	34.3387	5.74653	4.22415	7.30401	10.7169	5.79907	5.50804	4.22415	35.5066
318	74.9369	22.4213	101.113	33.9844	5.72885	4.54363	7.26883	10.471	5.74174	5.55919	4.27703	35.5185
317	73.7497	22.2961	101.308	33.9284	5.83053	4.34125	6.99639	10.7366	5.75669	5.49805	4.26749	35.6695
316	72.799	22.032	100.313	33.2811	5.43369	4.20717	6.95193	10.4961	5.78385	5.62918	4.28389	35.6389
315	72.0737	21.912	100.209	33.3065	5.41814	4.05327	6.7971	10.6206	5.81419	5.50372	4.41601	35.6767
314	71.5257	21.5307	99.9262	32.9963	5.4729	4.19225	6.92485	10.2971	5.89699	5.55646	4.33297	35.7087
313	69.9611	21.3614	99.3433	32.7159	5.5675	4.19911	6.76401	10.2672	5.82798	5.56018	4.39163	35.6058
312	68.769	21.3567	98.8835	32.4625	5.64934	4.1458	6.73072	10.4108	5.74162	5.51233	4.29885	35.6813
311	67.5901	21.2591	98.7481	32.1649	5.45579	4.27857	6.69957	10.3139	5.92815	5.48564	4.46256	35.7947
310	66.0276	20.9597	97.4308	31.737	5.33069	4.29508	6.64988	10.0207	5.88907	5.72493	4.37651	36.1028
309	64.6061	20.7199	96.8015	31.5216	5.37234	4.12296	6.47726	9.98596	5.94007	5.63574	4.34532	35.7189
308	63.2974	20.7339	96.3825	31.5198	5.44021	4.12529	6.45932	9.94802	5.89216	5.60708	4.5116	36.1074
307	62.4264	20.1578	95.8239	31.037	5.21619	4.07779	6.38002	10.0233	6.00723	5.72112	4.42273	36.1256
306	60.4838	19.9602	95.0058	30.7352	5.4043	4.16939	6.50891	9.96793	5.97687	5.76773	4.42667	35.9328
305	59.1217	19.7154	93.9194	30.2772	5.33365	3.99495	6.56876	10.0412	5.88002	5.58614	4.44156	36.0193
304	58.0592	19.8495	93.6883	29.9408	5.39577	4.13814	6.37717	9.96442	5.86815	5.77051	4.3687	35.9914
303	56.5994	19.4075	92.5664	29.4492	5.51927	4.12772	6.30695	9.80846	6.03348	5.73137	4.49176	36.0833
302	54.6198	19.2011	91.7791	29.1946	5.4695	4.06896	6.22167	10.0076	5.94621	5.76207	4.48266	36.0825
301	53.7019	19.0539	90.9436	28.8761	5.42069	4.0097	6.13927	9.63367	5.8548	5.67288	4.37135	35.9513
300	52.2377	18.8926	89.6919	28.7034	5.35535	3.99036	6.25358	9.8376	5.97516	5.68966	4.50265	36.1774
299	51.1881	18.4032	88.8248	28.298	5.24246	4.22623	6.35491	9.90408	5.92326	5.71028	4.4894	36.1616
298	49.9785	18.2854	87.248	27.9628	5.36721	4.05511	6.19176	9.71936	5.93645	5.78332	4.64586	36.2336
297	48.4798	17.9702	85.7795	27.6458	5.46278	4.03424	6.17082	9.74468	5.90079	5.80101	4.46368	36.1891
296	47.5263	17.7797	84.7117	27.3037	5.31848	3.92578	6.07639	9.66683	6.00477	5.80812	4.58093	36.2877
295	46.1796	17.6458	83.1163	27.0326	5.36343	4.16547	6.04849	9.67004	5.95146	5.84409	4.42449	36.2691
294	45.2162	17.2784	81.8587	26.4917	5.438	3.91571	6.1864	9.53172	6.05644	5.81085	4.43774	36.3729
293	43.8246	17.0648	80.2171	26.2556	5.44583	4.04877	6.23276	9.52649	6.06949	5.82333	4.469	36.0686
292	42.7302	16.9683	78.4155	26.0661	5.50232	4.08319	6.16058	9.47783	6.08787	5.87697	4.46129	36.2992
291	41.5417	16.6257	76.8813	25.4596	5.43422	3.94987	6.0109	9.4195	6.09256	5.93181	4.45267	36.3713
290	40.3071	16.4983	74.8763	25.2115	5.31643	4.05339	6.13919	9.43193	6.10782	5.92839	4.4701	36.1012
289	39.0462	16.3718	73.0564	24.9182	5.55415	4.00057	6.28181	9.2653	6.1532	5.89503	4.49056	36.2042
288	37.8667	15.8567	71.0521	24.4041	5.34172	3.98848	6.17217	9.30834	6.09005	5.91863	4.4811	36.3033
287	36.4021	15.659	68.9506	24.0878	5.55149	3.95479	5.9349	9.40673	6.091	5.93599	4.46129	35.9782
286	35.1757	15.4797	67.6294	23.7428	5.46815	4.05706	6.08561	9.35411	6.15943	5.97638	4.2927	35.9873
285	33.7181	15.3677	65.7328	23.226	5.50292	4.01206	6.01966	9.27327	6.18514	6.01351	4.42247	35.7769
284	32.2624	15.0051	63.5918	22.9585	5.41988	4.20033	6.08658	9.30517	6.20009	5.89017	4.63955	35.6011
283	30.885	14.6365	61.8854	22.4257	5.39234	4.08015	6.15339	9.24014	6.11008	5.99694	4.84194	35.6942
282	29.6341	14.2814	60.028	22.0767	5.51192	4.11808	6.01988	9.1924	6.24374	5.96146	4.50496	35.3964
281	28.3116	14.293	58.2972	21.6362	5.46849	4.02131	6.03454	9.18583	6.17428	5.95528	4.44296	35.2188
280	26.9343	13.7811	56.5612	21.3778	5.43306	4.00427	6.0545	9.11006	6.15675	5.99212	4.47157	35.0817
279	25.64	13.5743	54.5144	20.9544	5.40774	4.01554	6.03213	9.04936	6.26608	5.95582	4.48405	34.9269
278	24.4862	13.4744	53.0753	20.4726	5.47669	4.10324	5.91521	9.10328	6.1609	5.96777	4.53912	34.7797
277	23.1328	13.0692	51.258	20.1149	5.48888	4.09379	6.03337	9.11249	6.25282	6.02368	4.47421	34.3488
276	22.0032	12.7325	49.4988	19.6789	5.50657	3.99137	6.13733	9.03121	6.27749	6.0885	4.45708	34.4153
275	20.9431	12.619	47.5967	19.3877	5.44795	4.14111	5.94436	8.93018	6.23865	6.04932	4.5053	33.9654
274	20.0525	12.3314	46.2027	18.9543	5.51487	4.08814	5.8517	9.07994	6.30197	5.9737	4.53095	33.7676
273	19.3267	12.1269	44.5626	18.4394	5.48214	4.04585	5.95554	8.89142	6.28004	6.0035	4.54204	33.3751
272	18.3429	11.8718	42.7198	18.0664	5.50006	4.15668	6.02413	8.91439	6.30809	5.96422	4.55568	32.997
271	17.8939	11.6731	41.1367	17.7268	5.43825	4.08679	5.90059	8.82423	6.32803	5.98984	4.62879	32.6192
270	17.3808	11.4355	39.333	17.4336	5.43074	4.06033	5.94435	8.8744	6.33905	6.0051	4.6248	32.1015
269	16.5711	11.1502	37.576	17.0479	5.66249	4.12027	5.91864	8.78793	6.33158	5.99062	4.63496	31.8909
268	16.1948	10.9346	36.0935	16.5035	5.54278	4.11913	5.89313	8.76739	6.35961	6.02789	4.69727	31.4316
267	15.7928	10.7657	34.2636	16.2829	5.51937	4.04165	5.91679	8.72595	6.3693	5.9572	4.78099	30.9213
266	15.3687	10.7233	32.5493	15.912	5.58008	4.19231	5.95913	8.7447	6.40252	6.05101	4.77261	30.4549
265	15.2283	10.4804	31.2738	15.5069	5.62822	4.18012	5.99149	8.71653	6.45635	6.10966	4.85128	29.8002
264	15.002	10.3328	29.8115	15.0257	5.53835	4.1182	5.94085	8.68355	6.43047	6.08463	4.84833	29.2337
263	14.8122	10.3889	28.2896	14.8123	5.58912	4.13351	6.04813	8.65999	6.49461	6.04409	4.87354	28.6482
262	14.6392	10.15	27.0201	14.6167	5.58261	4.12623	6.10013	8.73963	6.48623	6.12708	4.93945	28.1909
261	14.5403	10.1611	25.8763	14.0303	5.73146	4.17574	6.03919	8.76385	6.55131	6.128	4.99624	27.6055
260	14.5099	10.0421	24.5956	13.828	5.66437	4.17307	6.09076	8.61137	6.51134	6.12155	4.90865	27.0956
259	14.5481	9.92769	23.5393	13.521	5.63693	4.12745	6.12812	8.75774	6.59451	6.1577	5.02082	26.5693
258	14.5041	9.84692	22.5964	13.2832	5.54689	4.14457	6.08379	8.51803	6.67298	6.15847	5.03111	26.1419
257	14.5249	9.85952	21.7846	12.9083	5.64415	4.22897	6.11655	8.63035	6.62776	6.14707	5.00851	25.75
256	14.4015	9.67169	21.1297	12.6406	5.71647	4.17313	6.11474	8.5406	6.59124	6.15871	5.01177	25.2162
255	14.3441	9.61587	20.2547	12.4179	5.66501	4.25163	6.08744	8.57203	6.67802	6.15145	4.96975	24.804
254	14.4303	9.57702	19.4934	12.1553	5.7036	4.17559	6.23378	8.62856	6.62618	6.10193	4.94001	24.3582
253	14.3915	9.537	19.204	12.0753	5.65655	4.20151	6.13783	8.57452	6.64583	6.17373	4.97371	24.0313
252	14.2615	9.506	18.7502	11.8215	5.85654	4.22076	6.08669	8.66115	6.63846	6.17548	4.93701	23.9077
251	14.1224	9.40596	18.2722	11.7429	5.74101	4.31046	6.30303	8.60902	6.72709	6.158	4.97673	23.6968
250	13.8464	9.45399	18.2991	11.5394	5.65106	4.29894	6.19485	8.61246	6.60061	6.0759	4.978	23.5272

## Sheet: Figure 4
Sample								115 -> 115 In ( ISTD ) [ N2O ]			115 -> 115 In ( ISTD ) [ He ]			47 -> 79 Ti [ N2O ]			49 -> 81 Ti [ N2O ]			88 -> 104 Sr [ N2O ]			90 -> 122 Zr [ N2O ]			103 -> 103 Rh [ He ]			118 -> 118 Sn [ N2O ]			118 -> 118 Sn [ He ]			137 -> 153 Ba [ N2O ]			139 -> 155 La [ N2O ]
	Rjct	Data File	Acq. Date-Time	Type	Level	Sample Name	Vial Number	CPS	CPS RSD	ISTD Recovery %	CPS	CPS RSD	ISTD Recovery %	Conc. [ ppb ]	Conc. RSD	CPS	Conc. [ ppb ]	Conc. RSD	CPS	Conc. [ ppb ]	Conc. RSD	CPS	Conc. [ ppb ]	Conc. RSD	CPS	Conc. [ ppb ]	Conc. RSD	CPS	Conc. [ ppb ]	Conc. RSD	CPS	Conc. [ ppb ]	Conc. RSD	CPS	Conc. [ ppb ]	Conc. RSD	CPS	Conc. [ ppb ]	Conc. RSD	CPS
	FALSE	001SMPL.d	2023-09-12 18:11:54	Sample		AM_blank	1307	1387999	4.4		762965	1.1				691			979			1388			394			30			87			27			40			33
	FALSE	002SMPL.d	2023-09-12 18:16:02	Sample		AM_blank	1307	1416071	0.3		745621	2.6				420			507			1271			430			30			147			33			77			33
	FALSE	003SMPL.d	2023-09-12 18:20:04	Sample		AM_blank	1307	1429725	0.9		757910	1.9				357			574			1105			497			30			113			87			43			40
	FALSE	004CALB.d	2023-09-12 18:24:12	CalBlk	1	0ppb	4101	1429256	1.4	100	779690	0.5	100	<0.355	N/A	697	<0.278	N/A	971	<0.170	N/A	129801	<0.007	N/A	1125	<0.003	N/A	270	<0.058	N/A	8265	<0.059	N/A	6696	<0.076	N/A	7901	<0.006	N/A	3848
	FALSE	005CALS.d	2023-09-12 18:28:17	CalStd	2	10ppb	4102	14774807	0.9	103.4	7928835	0.2	101.7	7.331	1.9	25715	9.748	2.6	34748	22.924	0.5	4612935	8.43	0.5	611648	9.787	0.2	1560097	9.654	1.1	366855	9.745	0.6	311298	9.612	1.5	257617	9.258	0.4	2017553
	FALSE	006CALS.d	2023-09-12 18:32:25	CalStd	3	20ppb	4103	5583353	0.5	102.8	2934375	0.4	99	14.854	2.2	51083	19	2.2	66393	21.949	1	4397837	16.947	1.1	1221659	19.804	0.6	3074154	19.169	0.1	716056	19.635	0.9	604117	18.666	0.8	489914	19.327	0.7	4184088
	FALSE	007CALS.d	2023-09-12 18:36:28	CalStd	4	50ppb	4104	10027785	0.6	103.2	5263982	1	99.3	39.105	1.1	133802	49.273	0.4	171220	52.903	1	10449746	43.099	0.7	3116466	49.36	0.2	7680640	48.975	0.5	1822921	49.303	0.4	1510659	46.608	1	1215503	49.03	1.5	10646880
	FALSE	008CALS.d	2023-09-12 18:40:35	CalStd	5	100ppb	4105	18697622	0.4	109	9510803	1	101.7	81.818	0.6	294976	95.748	0.8	350562	98.562	0.6	20448999	96.198	0.6	7348365	96.119	0.7	15312468	94.952	0.6	3725772	95.072	0.4	2976058	89.797	0.5	2466439	94.322	0.3	21638668
	FALSE	009CALS.d	2023-09-12 18:44:37	CalStd	6	200ppb	4106	36594374	0.6	106.7	18094958	0.4	96.7	183.486	1	646406	199.854	1	714890	202.099	0.3	40886848	200.039	0.8	14951797	200.262	0.7	30349480	200.129	1	7674777	200.166	0.5	5953562	200.079	1.3	5367312	199.701	0.3	44828501
	FALSE	010CALS.d	2023-09-12 18:48:44	CalStd	7	500ppb	4107	87612365	0.4	105.7	42583413	0.3	94.2	511.591	0.6	1784243	501.027	0.9	1773996	498.821	0.5	99775292	501.588	0.4	37140187	500.748	0.3	73898511	501.101	0.3	19024807	501.009	0.2	14501480	502.409	0.3	13340114	501.394	0.6	111497224
	FALSE	011SMPL.d	2023-09-12 18:52:47	Sample		AM_blank	1307	1403356	0.6	98.2	742770	1.1	95.3	<0.355	N/A	471	<0.278	N/A	564	<0.170	N/A	1488	<0.007	25.6	1415	0.03	5.3	4779	<0.058	N/A	1465	<0.059	N/A	1638	<0.076	N/A	110	<0.006	N/A	133
	FALSE	012SMPL.d	2023-09-12 18:56:56	Sample		AM_blank	1307	1417902	0.7	99.2	743403	2.2	95.3	<0.355	N/A	410	<0.278	N/A	440	<0.170	N/A	1455	<0.007	N/A	978	0.016	12.5	2616	<0.058	N/A	627	<0.059	N/A	704	<0.076	N/A	93	<0.006	N/A	77
137 -> 153 Ba [ N2O ] : CPS RSD value = 5.70 is over the allowed maximum = 5.00	FALSE	013SMPL.d	2023-09-12 19:00:59	Sample		SrZrO3	4108	1415448	0.9	99	750429	0.7	96.2	<0.355	5.7	1425	<0.278	14.1	1819	208.9	0.7	39227293	230.326	1.1	15980329	0.165	2.6	25097	<0.058	13.7	8926	<0.059	8.3	7657	0.095	23.7	10195	0.016	11	7150
103 -> 103 Rh [ He ] : CPS RSD value = 23.81 is over the allowed maximum = 5.00139 -> 155 La [ N2O ] : CPS RSD value = 5.02 is over the allowed maximum = 5.00	FALSE	014SMPL.d	2023-09-12 19:05:07	Sample		La,Rh:SrZrO3	4109	1419159	2.5	99.3	753042	1.5	96.6	<0.355	22.8	1385	0.303	28.5	1966	231.2	2.9	43495825	262.119	2.8	18226427	9.004	25.1	1360210	<0.058	106.3	8742	<0.059	29.7	7517	0.17	5.1	12082	14.631	3.9	3060712
137 -> 153 Ba [ N2O ] : CPS RSD value = 95.41 is over the allowed maximum = 5.00	FALSE	015SMPL.d	2023-09-12 19:09:10	Sample		SrZr0.5Ti0.5O3	4110	1436623	0.9	100.5	762479	0.9	97.8	47.21	0.4	157225	59.747	1.9	202034	190.636	0.9	36344282	111.247	1.7	7834595	0.1	1.9	15662	<0.058	30.7	9013	<0.059	100.7	6892	0.538	150	21626	<0.006	N/A	2790
103 -> 103 Rh [ He ] : CPS RSD value = 18.58 is over the allowed maximum = 5.00139 -> 155 La [ N2O ] : CPS RSD value = 7.97 is over the allowed maximum = 5.00	FALSE	016SMPL.d	2023-09-12 19:13:18	Sample		La,Rh:SrZr0.5Ti0.5O3	4111	1416174	1	99.1	739816	0.8	94.9	52.18	0.8	171226	66.44	1.3	221386	210.011	0.9	39454807	124.133	1.3	8617326	2.108	18.6	313770	<0.058	79.1	8679	<0.059	38.9	7260	0.264	2.6	14410	14.32	8.9	2987596
103 -> 103 Rh [ He ] : CPS RSD value = 7.37 is over the allowed maximum = 5.00	FALSE	017SMPL.d	2023-09-12 19:17:22	Sample		SrTiO3	4112	1413245	0.9	98.9	789544	1.5	101.3	115.498	1.9	377362	147.355	1.8	488769	255.77	0.6	47927653	1.048	3.3	73679	0.077	6.1	12576	<0.058	113.4	8508	<0.059	N/A	6632	0.213	10.2	13087	<0.006	46.5	4529
	FALSE	018SMPL.d	2023-09-12 19:21:29	Sample		La,Rh:SrTiO3	4201	1418067	0.8	99.2	740109	1	94.9	106.386	1.4	348852	136.367	1.5	453966	232.873	0.3	43795989	0.368	2.6	26695	10.214	2.1	1519876	<0.058	259.2	8295	<0.059	33.3	6946	3.925	4.1	105626	16.657	2.8	3481467
	FALSE	019SMPL.d	2023-09-12 19:25:33	Sample		BaZrO3	4202	1410011	1.1	98.7	750488	0.9	96.3	<0.355	34.7	1372	<0.278	24.2	1615	<0.170	21	130465	231.136	0.2	15976070	0.119	5.4	18257	<0.058	81	8345	<0.059	42.7	6892	380.735	0.8	9437905	0.032	6	10509
103 -> 103 Rh [ He ] : CPS RSD value = 12.49 is over the allowed maximum = 5.00139 -> 155 La [ N2O ] : CPS RSD value = 5.07 is over the allowed maximum = 5.00	FALSE	020SMPL.d	2023-09-12 19:29:41	Sample		La,Rh:BaZrO3	4203	1408891	0.3	98.6	749226	1	96.1	<0.355	7.9	1425	0.29	8.2	1916	0.871	2.4	290170	164.744	0.6	11378182	4.17	13.4	627680	<0.058	N/A	8058	<0.059	19.5	7083	262.443	0.6	6503078	7.077	4.8	1471701
	FALSE	021SMPL.d	2023-09-12 19:33:44	Sample		BaZr0.5Ti0.5O3	4204	1527353	0.4	106.9	806387	0.4	103.4	37.342	1.4	132372	47.102	1.5	169571	0.236	2.3	186368	85.233	1.2	6382292	0.057	3	9534	<0.058	N/A	8101	<0.059	N/A	6886	286.616	1.1	7698356	0.015	4.2	7487
103 -> 103 Rh [ He ] : CPS RSD value = 14.87 is over the allowed maximum = 5.00139 -> 155 La [ N2O ] : CPS RSD value = 15.65 is over the allowed maximum = 5.00	FALSE	022SMPL.d	2023-09-12 19:37:52	Sample		La,Rh:BaZr0.5Ti0.5O3	4205	1388832	0.4	97.2	745346	0.5	95.6	47.873	0.8	154123	60.06	1.9	196345	0.895	1.2	290577	109.053	0.5	7425026	2.928	14.3	439139	<0.058	34.9	8078	<0.059	18.9	6976	342.702	0.4	8368648	11.898	15.3	2437147
	FALSE	023SMPL.d	2023-09-12 19:41:55	Sample		BaTiO3	4206	1405492	0.7	98.3	742506	0.8	95.2	104.188	1.4	338644	131.425	2	433657	<0.170	N/A	116499	1.635	1.6	113719	0.066	2	10145	<0.058	71.7	8438	<0.059	36.2	6859	404.95	0.9	10005927	0.083	1.3	20973
139 -> 155 La [ N2O ] : CPS RSD value = 20.78 is over the allowed maximum = 5.00	FALSE	024SMPL.d	2023-09-12 19:46:02	Sample		La,Rh:BaTiO3	4207	1415548	0.7	99	780127	1.9	100.1	97.628	0.5	319640	120.565	1.1	400753	1.789	2.6	463456	0.371	1	26869	13.891	5.5	2177721	<0.058	49.3	8602	0.21	6.6	13147	382.994	0.5	9531532	30.978	20.9	6457086
	FALSE	025SMPL.d	2023-09-12 19:50:07	Sample		AM_blank	1307	1390581	0.5	97.3	749803	0.4	96.2	<0.355	N/A	297	<0.278	N/A	240	<0.170	N/A	1355	0.02	8	2463	<0.003	49.9	471	<0.058	N/A	140	<0.059	N/A	113	<0.076	N/A	147	<0.006	N/A	87
115 -> 115 In ( ISTD ) [ He ] : ISTD Recovery Percent value = 76.21 is outside the allowed range [80.00, 120.00]	FALSE	026SMPL.d	2023-09-12 19:54:15	Sample		100ppb	2107	1479393	1.4	103.5	594236	0.4	76.2	<0.355	N/A	274	<0.278	N/A	337	242.981	1.1	47664110	0.065	4.2	5851	0.012	7.5	1689	<0.058	N/A	1492	<0.059	N/A	978	284.25	1.2	7394781	284.113	0.9	61877190
	FALSE	027SMPL.d	2023-09-12 19:58:17	Sample		AM_blank	1307	1383074	0.8	96.8	745887	0.8	95.7	<0.355	N/A	274	<0.278	N/A	184	<0.170	N/A	1415	0.012	17.9	1899	<0.003	32.6	471	<0.058	N/A	130	<0.059	N/A	120	<0.076	N/A	143	<0.006	N/A	83
	FALSE	028SMPL.d	2023-09-12 20:02:25	Sample		AM_blank	1307	1382834	1.5	96.8	762893	0.9	97.8	<0.355	N/A	250	<0.278	N/A	441	<0.170	N/A	1348	0.01	15.9	1795	<0.003	38.1	514	<0.058	N/A	160	<0.059	N/A	113	<0.076	N/A	93	<0.006	N/A	53
							Indium corrected back to 0ppb

## Sheet: Figure 6
Sample	mode particle size (nm)
SrZrO3	291.21
La,Rh:SrZrO3	348.64
SrZr0.5Ti0.5O3	334.56
La,Rh:SrZr0.5Ti0.5O3	377.17
SrTiO3	253.05
La,Rh:SrTiO3	350.49
BaZrO3	339.38
La,Rh:BaZrO3	420.15
BaZr0.5Ti0.5O3	381.99
La,Rh:BaZr0.5Ti0.5O3	386.43
BaTiO3	360.13
La,Rh:BaTiO3	450.9

## Sheet: Figure 8a
	Hydrogen Produced	Hydrogen Produced	Hydrogen Produced	Hydrogen Produced	Hydrogen Produced	Hydrogen Produced	Hydrogen Produced	Hydrogen Produced	Hydrogen Produced	Hydrogen Produced	Hydrogen Produced	Hydrogen Produced
	μmol	μmol	μmol	μmol	μmol	μmol	μmol	μmol	μmol	μmol	μmol	μmol
Time	BaZrO3	La,Rh:BaZrO3	SrZrO3	La,Rh:SrZrO3	BaZr0.5Ti0.5O3	La,Rh:BaZr0.5Ti0.5O3	SrZr0.5Ti0.5O3	La,Rh:SrZr0.5Ti0.5O3	BaTiO3	La,Rh:BaTiO3	SrTiO3	La,Rh:SrTiO3
0	0	0	0	0	0	0.000864353	0	0.000850553	0.00204	0.00272	0.02622	0.003
1.5	0	0	0	0	0	0.02482	0	0.10037	0.11933	0.29301	0.28451	0.43363
3	0	0	0	0	0	0.06667	0	0.20593	0.22467	0.5044	0.58846	0.79674

## Sheet: Figure 8b
	Hydrogen Produced	Hydrogen Produced	Hydrogen Produced	Hydrogen Produced	Hydrogen Produced	Hydrogen Produced	Hydrogen Produced	Hydrogen Produced	Hydrogen Produced	Hydrogen Produced	Hydrogen Produced	Hydrogen Produced
	μmol	μmol	μmol	μmol	μmol	μmol	μmol	μmol	μmol	μmol	μmol	μmol
Time	BaZrO3	La,Rh:BaZrO3	SrZrO3	La,Rh:SrZrO3	BaZr0.5Ti0.5O3	La,Rh:BaZr0.5Ti0.5O3	SrZr0.5Ti0.5O3	La,Rh:SrZr0.5Ti0.5O3	BaTiO3	La,Rh:BaTiO3	SrTiO3	La,Rh:SrTiO3
0	0	0	0	0	0	0.000283276	0	0.000588341	0	0.00247	0	0.00258
1.5	0	0	0	0	0	0.00591	0	0.0126	0	0.06333	0	0.1645
3	0	0	0	0	0	0.01009	0	0.0221	0	0.11275	0	0.31847

## Sheet: Figure 9
	Kubelka-Munk	Kubelka-Munk				AQY	AQY
	Normalised	Normalised			Wavelength	La,Rh:SrTiO3	La,Rh:BaTiO3
Wavelength	La,Rh:SrTiO3	La,Rh:BaTiO3			365	0.63619	0.53495
800	0.000819749	9.936e-05			405	0.23947	0.16558
799	8.90297e-05	0			430	0.0974	0.1098
798	0	0.000704006			455	0.05826	0.09092
797	0.000899883	0.00329			470	0.02744	0.06039
796	0.000603082	0.00326			505	0.015	0.05582
795	0.000264271	0.00279
794	0.0011	0.00396
793	0.00148	0.00388
792	0.00168	0.00553
791	0.00159	0.00479
790	0.00161	0.00739
789	0.00206	0.00755
788	0.00187	0.00752
787	0.00199	0.0086
786	0.00314	0.01046
785	0.00226	0.0099
784	0.00326	0.01206
783	0.00361	0.01212
782	0.00404	0.01299
781	0.00429	0.01312
780	0.00469	0.01489
779	0.00525	0.01589
778	0.00484	0.01604
777	0.00505	0.01679
776	0.00573	0.01813
775	0.00523	0.0176
774	0.00591	0.0198
773	0.00637	0.02021
772	0.00639	0.02153
771	0.00671	0.02135
770	0.00768	0.02284
769	0.00715	0.02324
768	0.00797	0.02466
767	0.00791	0.02493
766	0.00834	0.02635
765	0.00852	0.02659
764	0.00888	0.02838
763	0.00901	0.02817
762	0.0093	0.02876
761	0.01003	0.02993
760	0.00945	0.0314
759	0.01043	0.03186
758	0.00989	0.03236
757	0.01028	0.03259
756	0.011	0.03403
755	0.01156	0.03619
754	0.01162	0.03568
753	0.01181	0.03721
752	0.01177	0.03751
751	0.01216	0.03865
750	0.01298	0.04041
749	0.0131	0.04103
748	0.0134	0.04197
747	0.01432	0.04379
746	0.01425	0.04364
745	0.01466	0.04556
744	0.01488	0.04607
743	0.01519	0.04685
742	0.01596	0.04809
741	0.01583	0.04881
740	0.01637	0.04964
739	0.01692	0.05053
738	0.0174	0.05238
737	0.01727	0.0535
736	0.01793	0.05473
735	0.01838	0.05502
734	0.01865	0.05529
733	0.01914	0.05752
732	0.01997	0.0582
731	0.02019	0.05933
730	0.02024	0.06043
729	0.0206	0.06118
728	0.02112	0.06253
727	0.02162	0.06357
726	0.02176	0.06426
725	0.0221	0.06574
724	0.02257	0.06684
723	0.02312	0.06831
722	0.0235	0.06842
721	0.02365	0.0694
720	0.02412	0.07091
719	0.02478	0.07224
718	0.02519	0.07321
717	0.02575	0.07396
716	0.02619	0.07523
715	0.02663	0.07707
714	0.02709	0.07754
713	0.02758	0.07858
712	0.02772	0.07962
711	0.02852	0.08085
710	0.02926	0.08218
709	0.02932	0.08338
708	0.03031	0.08418
707	0.03054	0.08508
706	0.03087	0.08611
705	0.03187	0.08776
704	0.03202	0.08857
703	0.03256	0.09025
702	0.03299	0.09117
701	0.0336	0.09193
700	0.03401	0.09267
699	0.03446	0.09405
698	0.03491	0.09572
697	0.03561	0.09673
696	0.03622	0.09828
695	0.03675	0.09921
694	0.03742	0.10028
693	0.03794	0.10119
692	0.03833	0.10278
691	0.03916	0.10381
690	0.03925	0.10499
689	0.0398	0.10554
688	0.04058	0.10712
687	0.04129	0.10775
686	0.04193	0.10911
685	0.04218	0.11053
684	0.04273	0.11093
683	0.04346	0.1124
682	0.04415	0.11355
681	0.04465	0.11438
680	0.04545	0.11622
679	0.04584	0.1167
678	0.04631	0.11841
677	0.04713	0.12
676	0.04766	0.12052
675	0.04788	0.12138
674	0.0486	0.12307
673	0.04933	0.12365
672	0.05003	0.12512
671	0.0505	0.12594
670	0.05121	0.12735
669	0.05188	0.12834
668	0.05266	0.12956
667	0.0532	0.1304
666	0.05384	0.13137
665	0.05448	0.13245
664	0.05523	0.13369
663	0.0558	0.13486
662	0.05663	0.1354
661	0.0572	0.13658
660	0.05809	0.13746
659	0.05857	0.13923
658	0.05932	0.14001
657	0.05971	0.14085
656	0.06081	0.14232
655	0.06143	0.14336
654	0.06206	0.1437
653	0.06266	0.14512
652	0.06343	0.14652
651	0.06396	0.14739
650	0.06475	0.14764
649	0.06564	0.14883
648	0.06636	0.15017
647	0.06686	0.15072
646	0.06774	0.15199
645	0.06862	0.15261
644	0.06933	0.15359
643	0.06991	0.1544
642	0.07045	0.15517
641	0.07127	0.15611
640	0.07205	0.15655
639	0.07294	0.15819
638	0.07348	0.15912
637	0.07421	0.15988
636	0.07513	0.16034
635	0.07572	0.1615
634	0.07646	0.16257
633	0.07748	0.16346
632	0.07844	0.16468
631	0.07893	0.16518
630	0.07978	0.16609
629	0.08036	0.16661
628	0.08088	0.16701
627	0.08186	0.16825
626	0.08273	0.16876
625	0.08336	0.16991
624	0.08414	0.17073
623	0.08516	0.17105
622	0.08591	0.17137
621	0.08655	0.17243
620	0.08757	0.17311
619	0.08834	0.17354
618	0.08879	0.17452
617	0.09009	0.17556
616	0.09035	0.17581
615	0.09127	0.17627
614	0.09212	0.17668
613	0.09285	0.17718
612	0.09383	0.17785
611	0.09459	0.17829
610	0.09509	0.17866
609	0.09588	0.17913
608	0.09679	0.18029
607	0.09781	0.18064
606	0.09835	0.18138
605	0.09885	0.18129
604	0.09999	0.18205
603	0.10064	0.1823
602	0.10141	0.18265
601	0.1022	0.18326
600	0.10329	0.18353
599	0.10364	0.18415
598	0.10455	0.18426
597	0.1053	0.18514
596	0.10614	0.18544
595	0.10659	0.18597
594	0.10738	0.18596
593	0.10817	0.18717
592	0.10911	0.18774
591	0.1098	0.18783
590	0.11058	0.18823
589	0.11088	0.18852
588	0.11227	0.18903
587	0.11298	0.18936
586	0.11317	0.18966
585	0.11424	0.19056
584	0.11511	0.19163
583	0.1158	0.19116
582	0.11636	0.19123
581	0.11727	0.19209
580	0.11811	0.19246
579	0.11859	0.19306
578	0.11896	0.19341
577	0.11977	0.19328
576	0.12067	0.19357
575	0.12197	0.19394
574	0.12221	0.19513
573	0.12303	0.19545
572	0.1231	0.1953
571	0.12492	0.19592
570	0.12563	0.19685
569	0.12615	0.19631
568	0.1265	0.19612
567	0.12769	0.19662
566	0.12812	0.19607
565	0.12868	0.19701
564	0.12939	0.19709
563	0.13008	0.19683
562	0.13062	0.19841
561	0.13153	0.19898
560	0.13286	0.19934
559	0.13316	0.19929
558	0.13391	0.19969
557	0.1348	0.20035
556	0.1354	0.20028
555	0.13575	0.19985
554	0.13653	0.2006
553	0.13727	0.20116
552	0.13836	0.20154
551	0.13854	0.20168
550	0.13969	0.20155
549	0.14005	0.20234
548	0.14073	0.20256
547	0.14131	0.20224
546	0.14211	0.20328
545	0.14299	0.20323
544	0.14294	0.20321
543	0.1439	0.20347
542	0.14495	0.20424
541	0.14549	0.2042
540	0.14587	0.20421
539	0.14649	0.20464
538	0.14689	0.20485
537	0.14757	0.2047
536	0.1485	0.20512
535	0.14939	0.20544
534	0.14993	0.2057
533	0.15021	0.20661
532	0.15075	0.20615
531	0.15158	0.20724
530	0.15218	0.20753
529	0.15263	0.20766
528	0.15329	0.20796
527	0.15361	0.20825
526	0.15432	0.2086
525	0.15504	0.20903
524	0.15551	0.2096
523	0.15577	0.20994
522	0.15654	0.21066
521	0.15729	0.21008
520	0.15762	0.21171
519	0.15897	0.21235
518	0.15871	0.21187
517	0.15946	0.2133
516	0.16046	0.2132
515	0.16069	0.21373
514	0.16121	0.21408
513	0.1616	0.21437
512	0.16186	0.21431
511	0.16265	0.2147
510	0.16311	0.21543
509	0.16346	0.21569
508	0.16439	0.21633
507	0.16473	0.21678
506	0.16531	0.21651
505	0.16558	0.21762
504	0.16649	0.21869
503	0.16698	0.21899
502	0.16753	0.21958
501	0.16808	0.22123
500	0.16832	0.22131
499	0.16817	0.22083
498	0.16896	0.22214
497	0.1697	0.22265
496	0.17016	0.22368
495	0.17067	0.22428
494	0.1716	0.22482
493	0.17182	0.2262
492	0.17237	0.22669
491	0.17282	0.22681
490	0.17356	0.22832
489	0.17432	0.22949
488	0.17484	0.22982
487	0.17492	0.23056
486	0.17626	0.23194
485	0.17561	0.23218
484	0.17679	0.23286
483	0.17703	0.23464
482	0.17747	0.23567
481	0.17811	0.23668
480	0.17886	0.23783
479	0.17885	0.23865
478	0.18012	0.24005
477	0.18101	0.24109
476	0.18108	0.2417
475	0.18156	0.24394
474	0.18257	0.24528
473	0.18348	0.24658
472	0.18368	0.24679
471	0.18413	0.24959
470	0.18516	0.25113
469	0.18479	0.25102
468	0.18646	0.25298
467	0.18657	0.25438
466	0.18765	0.2566
465	0.18852	0.2582
464	0.18899	0.25941
463	0.18967	0.2614
462	0.19099	0.26256
461	0.19123	0.26448
460	0.1922	0.26636
459	0.19322	0.26878
458	0.19372	0.27076
457	0.19399	0.27184
456	0.19564	0.27398
455	0.19587	0.27551
454	0.19708	0.27834
453	0.19745	0.27991
452	0.19884	0.28258
451	0.19945	0.28415
450	0.20102	0.28629
449	0.20222	0.28845
448	0.20267	0.29067
447	0.20394	0.29323
446	0.2048	0.29524
445	0.20611	0.29754
444	0.20734	0.29903
443	0.20886	0.30294
442	0.21065	0.30522
441	0.21103	0.30748
440	0.21222	0.31026
439	0.21342	0.31248
438	0.21491	0.31523
437	0.21647	0.31736
436	0.21826	0.32029
435	0.21968	0.32348
434	0.22073	0.32568
433	0.22313	0.32837
432	0.22408	0.33146
431	0.22646	0.33475
430	0.22826	0.33746
429	0.23015	0.34102
428	0.23142	0.343
427	0.23333	0.3478
426	0.23526	0.34971
425	0.23739	0.35296
424	0.23947	0.3564
423	0.24179	0.36092
422	0.2432	0.36274
421	0.24635	0.3667
420	0.24903	0.37147
419	0.25047	0.37619
418	0.25267	0.37935
417	0.25555	0.38213
416	0.25744	0.38648
415	0.2605	0.39084
414	0.26311	0.39442
413	0.26602	0.39743
412	0.26846	0.40189
411	0.27162	0.40657
410	0.27358	0.41071
409	0.27801	0.41354
408	0.28043	0.41828
407	0.28209	0.42495
406	0.28594	0.42836
405	0.28907	0.43174
404	0.2927	0.43514
403	0.29593	0.44176
402	0.29977	0.44628
401	0.30229	0.44988
400	0.30698	0.45377
399	0.31004	0.46074
398	0.31355	0.46588
397	0.31798	0.47056
396	0.32057	0.47648
395	0.32482	0.48082
394	0.32972	0.48649
393	0.33058	0.4915
392	0.33574	0.49577
391	0.3387	0.50292
390	0.3448	0.51299
389	0.34813	0.51537
388	0.35188	0.5243
387	0.3559	0.53032
386	0.36086	0.53766
385	0.36527	0.54497
384	0.37092	0.55741
383	0.37677	0.56659
382	0.38274	0.5762
381	0.38857	0.58769
380	0.39528	0.59664
379	0.40328	0.6136
378	0.41343	0.62688
377	0.41974	0.63652
376	0.4289	0.64859
375	0.44101	0.6663
374	0.45386	0.67537
373	0.46983	0.68956
372	0.48617	0.69931
371	0.50064	0.71006
370	0.52157	0.73192
369	0.54006	0.73809
368	0.5667	0.74853
367	0.58501	0.76096
366	0.61073	0.7696
365	0.63227	0.78249
364	0.65385	0.79114
363	0.67558	0.80486
362	0.6948	0.80915
361	0.70779	0.82158
360	0.72229	0.83439
359	0.73882	0.82854
358	0.75187	0.84838
357	0.76825	0.85022
356	0.77164	0.8597
355	0.78452	0.85973
354	0.79416	0.86852
353	0.79898	0.87968
352	0.81579	0.87195
351	0.8283	0.88476
350	0.83319	0.88499
349	0.85924	0.90037
348	0.92347	0.94498
347	0.91507	0.94422
346	0.89802	0.93474
345	0.90301	0.9528
344	0.93144	0.90889
343	0.91536	0.94981
342	0.92633	0.93401
341	0.9374	0.91584
340	0.92568	0.93672
339	0.96077	0.92748
338	0.96549	0.93813
337	0.94643	0.93262
336	0.94493	0.92565
335	0.98011	0.91378
334	0.97396	0.93252
333	0.97377	0.94217
332	0.95885	0.90477
331	1	0.9232
330	0.97564	0.9251
329	0.98262	0.92014
328	0.95575	0.93396
327	0.96859	0.94928
326	0.97789	0.93628
325	0.9823	0.89963
324	0.96139	0.9257
323	0.96251	0.91212
322	0.9762	0.90713
321	0.96387	0.91838
320	0.9603	0.9245
319	0.96601	0.91342
318	0.98004	0.90892
317	0.98587	0.91864
316	0.97725	0.90413
315	0.983	0.92191
314	0.97256	0.9172
313	0.98054	0.91873
312	0.99032	0.92685
311	0.96902	0.93233
310	0.97093	0.9043
309	0.97598	0.91733
308	0.97132	0.92297
307	0.97486	0.91083
306	0.98219	0.90718
305	0.977	0.93182
304	0.9903	0.91094
303	0.98596	0.9178
302	0.98598	0.91611
301	0.99395	0.92925
300	0.9997	0.92926
